# Supplementary material for: Pd-catalysed C–H alkynylation of benzophospholes
Source: Royal Society of Chemistry journal article supplement (doi:10.1039/d3cc05994d), 2024-01-01
Supplement: d3cc05994d1.pdf [file d3cc05994d1.pdf]

## Supplementary Information

### Pd-catalysed C–H alkynylation of benzophospholes

Yu Tokura,<sup>†</sup> Shibo Xu,<sup>‡</sup> Kosuke Yasui,<sup>†</sup> Yuji Nishii,<sup>†</sup> and Koji Hirano<sup>\*,†,‡</sup>

<sup>†</sup>*Department of Applied Chemistry, Graduate School of Engineering, Osaka University, Suita, Osaka 565-0871, Japan*

<sup>‡</sup>*Innovative Catalysis Science Division, Institute for Open and Transdisciplinary Research Initiatives (ICS-OTRI), Osaka University, Suita, Osaka 565-0871, Japan*

*E-mail: k\_hirano@chem.eng.osaka-u.ac.jp (K.H.)*

## Contents

|                                                                       |         |
|-----------------------------------------------------------------------|---------|
| <b>Instrumentation and Chemicals</b>                                  | S2      |
| <b>Experimental Procedures and Characterization Data for Products</b> | S4–S18  |
| <b>X-Ray Analysis</b>                                                 | S19–S22 |
| <b>Detailed Optimisation Studies</b>                                  | S23–S26 |
| <b>Chiral HPLC Charts</b>                                             | S27     |
| <b>Control Experiments</b>                                            | S28     |
| <b>Plausible Mechanism</b>                                            | S29     |
| <b>Photoluminescence Properties</b>                                   | S30     |
| <b>Cyclic Voltammetry and Differential Pulse Voltammetry</b>          | S31–S37 |
| <b>Robustness Screen</b>                                              | S38     |
| <b>Copies of NMR spectra</b>                                          | S39–S80 |
| <b>References</b>                                                     | S81     |

### Instrumentation and Chemicals

$^1\text{H}$ ,  $^{13}\text{C}\{^1\text{H}\}$ ,  $^{19}\text{F}\{^1\text{H}\}$ , and  $^{31}\text{P}\{^1\text{H}\}$  NMR spectra were recorded at 400 MHz, 100 MHz, 376 MHz, and 162 MHz, respectively, for  $\text{CDCl}_3$  solutions. HRMS data were obtained by APCI using TOF. GC analysis was carried out using a silicon OV-17 column (i. d. 2.6 mm x 1.5 m) or a CBP-1 capillary column (i. d. 0.5 mm x 25 m). TLC analyses were performed on commercial glass plates bearing a 0.25 mm layer of Merck silica gel 60F<sub>254</sub>. Silica gel (60 N, spherical neutral, Kanto Chemical Co.) was used for column chromatography. Gel permeation chromatography (GPC) was performed by LC-20AR (pump, SHIMADZU, 7.5 mL/min  $\text{CHCl}_3$ ) and SPD-20A (UV detector, SHIMADZU, 254 nm) with two in-line YMC-GPC T2000 (20 x 600 mm, particle size: 10  $\mu\text{m}$ ) (preparative columns, YMC). UV-vis spectra were acquired with JASCO V-750 spectrometer. Photoluminescence spectra and quantum yield measurements were conducted with JASCO FP-8500 spectrometer equipped with an integration sphere system. The crystal measurement was performed with XtaLAB Synergy-S/Cu or Mo (Rigaku). Cyclic voltammograms and differential pulse voltammograms were recorded on ALS Electrochemical Analyzer Model 600E equipped with SVC-3 Voltammetry cell. Counter and working electrodes were made of Pt, and the reference electrode was  $\text{Ag}/\text{Ag}^+$ . The working electrodes were polished on a cloth polishing pad in an alumina slurry and then washed in  $\text{H}_2\text{O}$  under sonication before use. The measurements were conducted in MeCN solvent (degassed by  $\text{N}_2$  gas bubbling) containing tetrabutylammonium hexafluorophosphate as a supporting

electrolyte at an indicated scan rate. All the potentials were calibrated with the standard ferrocene/ferrocenium (Fc/Fc<sup>+</sup>) redox couple measured in identical conditions.

Unless otherwise noted, materials obtained from commercial suppliers were used without further purification. 1,4-Dioxane was dried on a Glass Contour Solvent dispensing system (Nikko Hansen & Co., Ltd.) prior to use. Pd(OPiv)<sub>2</sub> and NaOPiv were purchased from Sigma-Aldrich. The C2-H benzophospholes **1**<sup>S1</sup> and alkynyl bromides **2**<sup>S2</sup> were prepared according to the literature methods. Unless otherwise noted, all reactions were performed under nitrogen atmosphere.

## Experimental Procedures and Characterization Data for Products

### Pd-Catalysed C2-H Alkynylation of Benzophospholes (Scheme 2: general procedure A)

A 0.10 mmol scale synthesis of 3: The benzophosphole oxide **1** (0.10 mmol), Pd(OPiv)<sub>2</sub> (3.1 mg, 0.010 mmol), and NaOPiv · xH<sub>2</sub>O (25 mg, 0.20 mmol) were placed in a Schlenk tube, which was filled with N<sub>2</sub> by using the standard Schlenk technique. 1,4-Dioxane (1.5 mL) and the alkynyl bromide **2** (0.20 mmol) were finally added via syringe. The mixture was stirred at 60 °C for 48 h (oil bath). The resulting mixture was cooled to room temperature and then quenched with water and brine. Extraction with ethyl acetate three times, filtration through a short pad of Na<sub>2</sub>SO<sub>4</sub> and cerite, and evaporation under reduced pressure formed a crude material. The residue was purified by column chromatography on silica gel with hexane/ethyl acetate to give the corresponding C2–H alkynylated benzophosphole.

A 1.0 mmol scale synthesis of 3aa: 1,3-Diphenylphosphindole 1-oxide (**1a**; 303 mg, 1.0 mmol), Pd(OPiv)<sub>2</sub> (31 mg, 0.10 mmol), NaOPiv · xH<sub>2</sub>O (248 mg, 2.0 mmol), and 1,4-dioxane (15 mL) were placed in a Schlenk tube, which was filled with N<sub>2</sub> by using the standard Schlenk technique. 1,4-Dioxane (15 mL) and tri(isopropyl)silyl (TIPS)-substituted alkynyl bromide **2a** (523 mg, 2.0 mmol) were finally added via syringe. The mixture was stirred at 60 °C for 48 h (oil bath). The resulting mixture was cooled to room temperature and then quenched with water and brine. Extraction with ethyl acetate three times, filtration through a short pad of Na<sub>2</sub>SO<sub>4</sub> and cerite, and evaporation under reduced pressure formed a crude material. The residue was purified by column chromatography on silica gel with hexane/ethyl acetate (2:1, v/v) then GPC (CHCl<sub>3</sub>) to give 1,3-diphenyl-2-((triisopropylsilyl)ethynyl)phosphindole 1-oxide (**3aa**; 329 mg, 0.68 mmol) in 68% yield.

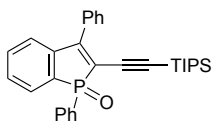

**1,3-Diphenyl-2-((triisopropylsilyl)ethynyl)phosphindole 1-oxide (3aa)**: Synthesized from **1a** (31 mg, 0.10 mmol) and **2a** (52 mg, 0.20 mmol) according to the general procedure A, purified by silica gel column chromatography with hexane/ethyl acetate (2/1, v/v): 35 mg (72%, 0.10 mmol scale); Yellow solid; m.p. 111.1-111.8 °C; <sup>1</sup>H NMR (400 MHz, CDCl<sub>3</sub>) δ 7.83-7.78 (m, 2H), 7.73 (dd, *J* = 9.8, 7.2 Hz, 1H), 7.64-7.61 (m, 2H), 7.56-7.42 (m, 9H), 0.96-0.88 (m, 21H); <sup>13</sup>C{<sup>1</sup>H} NMR (100 MHz, CDCl<sub>3</sub>) δ

157.1 (d,  $J = 20.7$  Hz, 1C), 142.3 (d,  $J = 24.4$  Hz, 1C), 133.2 (d,  $J = 13.2$  Hz, 1C), 133.0 (d,  $J = 1.8$  Hz, 1C), 132.5 (d,  $J = 2.8$  Hz, 1C), 131.3 (1C), 131.2 (1C), 131.1 (d,  $J = 104.9$  Hz, 1C), 129.9 (d,  $J = 10.8$  Hz, 1C), 129.8 (d,  $J = 9.2$  Hz, 1C), 129.5 (1C), 129.0 (d,  $J = 103.8$ , 1C), 128.9 (2C), 128.8 (1C), 128.7 (1C), 128.4 (2C), 124.6 (d,  $J = 10.3$  Hz, 1C), 119.8 (d,  $J = 102.6$  Hz, 1C), 104.8 (d,  $J = 5.8$  Hz, 1C), 99.5 (d,  $J = 9.2$  Hz, 1C), 18.5 (6C), 11.1 (3C);  $^{31}\text{P}\{^1\text{H}\}$  NMR (162 MHz,  $\text{CDCl}_3$ )  $\delta$  36.30; HRMS (APCI)  $m/z$  ( $[\text{M}+\text{H}]^+$ ) calcd for  $\text{C}_{31}\text{H}_{36}\text{OPSi}$ : 483.2268, found: 483.2287.

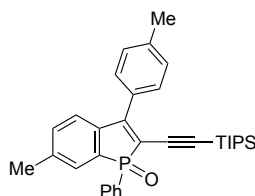

**6-Methyl-1-phenyl-3-(*p*-tolyl)-2-((triisopropylsilyl)ethynyl)phosphindole 1-oxide (3ba):**

Synthesized from **1b** (33 mg, 0.10 mmol) and **2a** (52 mg, 0.20 mmol) according to the general procedure A, purified by silica gel column chromatography with hexane/ethyl acetate (1/1, v/v): 37 mg (72%, 0.10 mmol scale); Yellow solid; m.p. 135.8-136.5 °C;  $^1\text{H}$  NMR (400 MHz,  $\text{CDCl}_3$ )  $\delta$  7.83-7.77 (m, 2H), 7.56-7.51 (m, 4H), 7.46-7.41 (m, 2H), 7.34 (dd,  $J = 7.9, 3.3$  Hz, 1H), 7.29-7.27 (m, 3H), 2.42 (s, 3H), 2.36 (s, 3H), 0.99-0.86 (m, 21H);  $^{13}\text{C}\{^1\text{H}\}$  NMR (100 MHz,  $\text{CDCl}_3$ )  $\delta$  157.3 (dd,  $J = 20.7$  Hz, 1C), 140.3 (d,  $J = 10.4$  Hz, 1C), 139.7 (d,  $J = 24.4$  Hz, 1C), 139.6 (1C), 133.4 (d,  $J = 1.5$  Hz, 1C), 132.3 (d,  $J = 2.8$  Hz, 1C), 131.4 (d,  $J = 104.3$  Hz, 1C), 131.3 (1C), 131.2 (1C), 130.52 (d,  $J = 9.3$  Hz, 1C), 130.46 (d,  $J = 13.3$  Hz, 1C), 129.3 (d,  $J = 103.3$  Hz, 1C), 129.0 (2C), 128.8 (2C), 128.7 (1C), 128.6 (1C), 124.5 (d,  $J = 11.0$  Hz, 1C), 117.9 (d,  $J = 103.7$  Hz, 1C), 103.9 (d,  $J = 5.8$  Hz, 1C), 99.9 (d,  $J = 9.4$  Hz, 1C), 21.5 (1C), 21.3 (1C), 18.5 (6C), 11.2 (3C);  $^{31}\text{P}\{^1\text{H}\}$  NMR (162 MHz,  $\text{CDCl}_3$ )  $\delta$  36.37; HRMS (APCI)  $m/z$  ( $[\text{M}+\text{H}]^+$ ) calcd for  $\text{C}_{33}\text{H}_{40}\text{OPSi}$ : 511.2581, found: 511.2585.

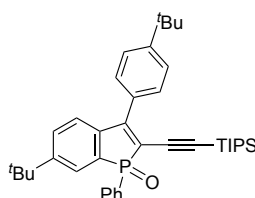

**6-(*tert*-Butyl)-3-(4-(*tert*-butyl)phenyl)-1-phenyl-2-((triisopropylsilyl)ethynyl)phosphindole 1-oxide (3ca):**

Synthesized from **1c** (41 mg, 0.10 mmol) and **2a** (52 mg, 0.20 mmol) according to the general procedure A, purified by silica gel column chromatography with hexane/ethyl acetate (2/1, v/v) and GPC ( $\text{CHCl}_3$ ): 50 mg (84%, 0.10 mmol scale); Yellow solid; m.p. 191.9-192.6 °C;  $^1\text{H}$  NMR (400 MHz,

CDCl<sub>3</sub>) δ 7.84-7.77 (m, 3H), 7.61-7.58 (m, 2H), 7.55-7.41 (m, 7H), 1.36 (s, 9H), 1.32 (s, 9H), 0.92-0.88 (m, 21H); <sup>13</sup>C{<sup>1</sup>H} NMR (100 MHz, CDCl<sub>3</sub>) δ 157.5 (dd, *J* = 20.9 Hz, 1C), 153.6 (d, *J* = 9.7 Hz, 1C), 152.6 (1C), 139.7 (d, *J* = 24.6 Hz, 1C), 132.3 (d, *J* = 2.8 Hz, 1C), 131.3 (1C), 131.2 (1C), 131.1 (d, *J* = 101.1 Hz, 1C), 130.5 (d, *J* = 9.9 Hz, 1C), 129.9 (d, *J* = 1.4 Hz, 1C), 129.4 (d, *J* = 103.2 Hz, 1C), 128.71 (1C), 128.67 (2C), 128.6 (1C), 126.9 (d, *J* = 9.7 Hz, 1C), 125.3 (2C), 124.4 (d, *J* = 11.0 Hz, 1C), 118.4 (d, *J* = 103.7 Hz, 1C), 103.4 (d, *J* = 5.8 Hz, 1C), 100.1 (d, *J* = 9.5 Hz, 1C), 35.1 (1C), 34.8 (1C), 31.25 (3C), 31.18 (3C), 18.5 (6C), 11.2 (3C); <sup>31</sup>P{<sup>1</sup>H} NMR (162 MHz, CDCl<sub>3</sub>) δ 36.64; HRMS (APCI) *m/z* ([*M*+*H*]<sup>+</sup>) calcd for C<sub>39</sub>H<sub>52</sub>OPSi: 595.3520, found: 595.3509.

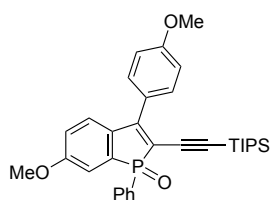

**6-Methoxy-3-(4-methoxyphenyl)-1-phenyl-2-((triisopropylsilyl)ethynyl)phosphindole 1-oxide (3da):**

Synthesized from **1d** (36 mg, 0.10 mmol) and **2a** (52 mg, 0.20 mmol) according to the general procedure A, purified by silica gel column chromatography with hexane/ethyl acetate (1/1, v/v): 52 mg (95%, 0.10 mmol scale); Orange solid; m.p. 165.2-165.9 °C; <sup>1</sup>H NMR (400 MHz, CDCl<sub>3</sub>) δ 7.83-7.77 (m, 2H), 7.66-7.63 (m, 2H), 7.59-7.55 (m, 1H), 7.44 (td, *J* = 7.7, 3.1 Hz, 2H), 7.40 (dd, *J* = 8.6, 3.8 Hz, 1H), 7.28 (dd, *J* = 11.1, 2.5 Hz, 1H), 7.01-6.96 (m, 3H), 3.87 (s, 3H), 3.83 (s, 3H), 0.97-0.87 (m, 21H); <sup>13</sup>C{<sup>1</sup>H} NMR (100 MHz, CDCl<sub>3</sub>) δ 161.4 (d, *J* = 13.7 Hz, 1C), 160.5 (1C), 156.9 (d, *J* = 21.0 Hz, 1C), 134.7 (d, *J* = 24.3 Hz, 1C), 133.5 (d, *J* = 103.5 Hz, 1C), 132.4 (d, *J* = 2.8 Hz, 1C), 131.3 (1C), 131.2 (1C), 130.5 (2C), 129.3 (d, *J* = 103.7 Hz, 1C), 128.7 (1C), 128.6 (1C), 125.9 (d, *J* = 12.2 Hz, 1C), 125.8 (d, *J* = 12.6 Hz, 1C), 117.9 (1C), 115.7 (d, *J* = 105.6 Hz, 1C), 115.4 (d, *J* = 10.4 Hz, 1C), 113.8 (2C), 102.7 (d, *J* = 5.9 Hz, 1C), 100.1 (d, *J* = 9.5 Hz, 1C), 55.7 (1C), 55.4 (1C), 18.5 (6C), 11.2 (3C); <sup>31</sup>P{<sup>1</sup>H} NMR (162 MHz, CDCl<sub>3</sub>) δ 35.94; HRMS (APCI) *m/z* ([*M*+*H*]<sup>+</sup>) calcd for C<sub>33</sub>H<sub>40</sub>O<sub>3</sub>PSi: 543.2479, found: 543.2469.

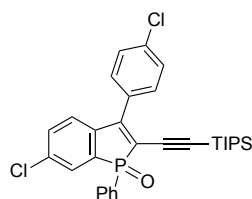

**6-Chloro-3-(4-chlorophenyl)-1-phenyl-2-((triisopropylsilyl)ethynyl)phosphindole 1-oxide (3ea):**

Synthesized from **1e** (37 mg, 0.10 mmol) and **2a** (52 mg, 0.20 mmol) according to the general procedure A, purified by silica gel column chromatography with hexane/ethyl acetate (2/1, v/v): 39 mg (71%, 0.10 mmol scale); Yellow solid; m.p. 138.5-139.2 °C; <sup>1</sup>H NMR (400 MHz, CDCl<sub>3</sub>) δ 7.81-7.76 (m, 2H), 7.69 (dd, *J* = 10.0, 1.96 Hz, 1H), 7.61-7.55 (m, 3H), 7.50-7.45 (m, 5H), 7.32 (dd, *J* = 8.3, 3.4 Hz, 1H), 1.00-0.86 (m, 21H); <sup>13</sup>C{<sup>1</sup>H} NMR (100 MHz, CDCl<sub>3</sub>) δ 154.8 (d, *J* = 20.3 Hz, 1C), 140.7 (d, *J* = 24.0 Hz, 1C), 136.7 (d, *J* = 14.0 Hz, 1C), 135.7 (1C), 133.2 (d, *J* = 102.3 Hz, 1C), 133.0 (d, *J* = 1.3 Hz, 1C), 132.9 (d, *J* = 2.9 Hz, 1C), 131.23 (d, *J* = 13.3 Hz, 1C), 131.21 (1C), 131.1 (1C), 130.2 (2C), 130.1 (d, *J* = 10.3, 1C), 129.0 (1C), 128.90 (2C), 128.88 (1C), 127.9 (d, *J* = 104.9 Hz, 1C), 125.3 (d, *J* = 11.2 Hz, 1C), 120.4 (d, *J* = 102.7 Hz, 1C), 106.6 (d, *J* = 5.9 Hz, 1C), 98.9 (d, *J* = 9.2 Hz, 1C), 18.4 (6C), 11.1 (3C); <sup>31</sup>P{<sup>1</sup>H} NMR (162 MHz, CDCl<sub>3</sub>) δ 35.10; HRMS (APCI) *m/z* ([*M*+*H*]<sup>+</sup>) calcd for C<sub>31</sub>H<sub>34</sub>Cl<sub>2</sub>OPSi: 551.1488, found: 551.1480.

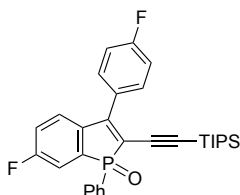

**6-Fluoro-3-(4-fluorophenyl)-1-phenyl-2-((triisopropylsilyl)ethynyl)phosphindole 1-oxide (3fa):**

Synthesized from **1f** (34 mg, 0.10 mmol) and **2a** (52 mg, 0.20 mmol) according to the general procedure A, purified by silica gel column chromatography with hexane/ethyl acetate (2/1, v/v): 51 mg (97%, 0.10 mmol scale); Pale yellow solid; m.p. 107.8-108.5 °C; <sup>1</sup>H NMR (400 MHz, CDCl<sub>3</sub>) δ 7.81-7.76 (m, 2H), 7.64-7.56 (m, 3H), 7.49-7.35 (m, 4H), 7.21-7.16 (m, 3H), 0.99-0.87 (m, 21H); <sup>13</sup>C{<sup>1</sup>H} NMR (100 MHz, CDCl<sub>3</sub>) δ 163.1 (dd, *J* = 253.1, 15.3 Hz, 1C), 162.3 (d, *J* = 248.7 Hz, 1C), 154.1 (dd, *J* = 20.3, 1.8 Hz, 1C), 136.9 (dd, *J* = 23.8, 3.1 Hz, 1C), 133.0 (dd, *J* = 103.2, 6.7 Hz, 1C), 131.8 (d, *J* = 2.8 Hz, 1C), 130.1 (d, *J* = 10.9 Hz, 2C), 129.8 (d, *J* = 8.2 Hz, 2C), 128.0 (dd, *J* = 16.8, 3.4 Hz, 1C), 127.9 (1C), 127.8 (1C), 127.1 (d, *J* = 104.8 Hz, 1C), 125.0 (dd, *J* = 12.1, 7.8 Hz, 1C), 118.62 (dd, *J* = 22.5, 1.1 Hz, 1C), 118.58 (dd, *J* = 103.9, 4.0 Hz, 1C), 116.6 (dd, *J* = 23.9, 10.3 Hz, 1C), 114.7 (d, *J* = 21.7 Hz, 2C), 104.3 (d, *J* = 5.9 Hz, 1C), 98.0 (d, *J* = 9.3 Hz, 1C), 17.4 (6C), 10.1 (3C); <sup>19</sup>F{<sup>1</sup>H} NMR (376 MHz, CDCl<sub>3</sub>) δ -109.6 (d, *J* = 4.8 Hz), -110.3; <sup>31</sup>P{<sup>1</sup>H} NMR (162 MHz, CDCl<sub>3</sub>) δ 34.76 (d, *J* = 5.4 Hz); HRMS (APCI) *m/z* ([*M*+*H*]<sup>+</sup>) calcd for C<sub>31</sub>H<sub>34</sub>F<sub>2</sub>OPSi: 519.2079, found: 519.2080.

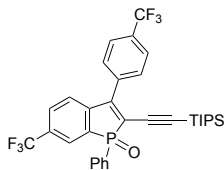

**1-Phenyl-6-(trifluoromethyl)-3-(4-(trifluoromethyl)phenyl)-2-((triisopropylsilyl)ethynyl)phosphindole 1-oxide (3ga):** Synthesized from **1g** (44 mg, 0.10 mmol) and **2a** (52 mg, 0.20 mmol) according to the general procedure A, purified by silica gel column chromatography with hexane/ethyl acetate (2/1, v/v): 39 mg (63%, 0.10 mmol scale); Pale yellow solid; m.p. 148.5-149.2 °C;  $^1\text{H}$  NMR (400 MHz,  $\text{CDCl}_3$ )  $\delta$  7.99 (d,  $J = 10.0$  Hz, 1H), 7.83-7.71 (m, 7H), 7.64-7.59 (m, 1H), 7.52-7.45 (m, 3H), 0.98-0.85 (m, 21H);  $^{13}\text{C}\{^1\text{H}\}$  NMR (100 MHz,  $\text{CDCl}_3$ )  $\delta$  154.2 (d,  $J = 20.2$  Hz, 1C), 145.0 (d,  $J = 24.0$  Hz, 1C), 136.3 (d,  $J = 13.1$  Hz, 1C), 133.2 (d,  $J = 2.9$  Hz, 1C), 133.1 (1C), 132.7, 132.6, 132.5, 132.4, 132.3, 132.2, 132.1, 131.94, 131.88, 131.7, 131.61, 131.55, 131.50, 131.2 (1C), 130.5 (dd,  $J = 3.4, 2.2$  Hz, 1C), 129.20 (2C), 129.16 (1C), 129.0 (1C), 127.8, 127.7, 127.5, 126.9, 126.83, 126.80, 126.76, 126.73, 126.67, 125.8 (dd,  $J = 7.2, 3.6$  Hz, 1C), 125.1, 124.81, 124.79, 124.6, 124.2 (d,  $J = 10.1$  Hz, 1C), 123.6, 122.4, 122.10, 122.08, 119.7, 119.4, 108.7 (d,  $J = 5.8$  Hz, 1C), 98.4 (d,  $J = 9.0$  Hz, 1C), 18.4 (6C), 11.0 (3C) (All observed signals cannot be completely assigned because of complexity associated with C–F and C–P couplings.);  $^{19}\text{F}\{^1\text{H}\}$  NMR ( $\text{CDCl}_3$ , 376 MHz)  $\delta$  -62.7, -62.9;  $^{31}\text{P}\{^1\text{H}\}$  NMR (162 MHz,  $\text{CDCl}_3$ )  $\delta$  34.96; HRMS (APCI)  $m/z$  ( $[\text{M}+\text{H}]^+$ ) calcd for  $\text{C}_{33}\text{H}_{34}\text{F}_6\text{OPSi}$ : 619.2015, found: 619.2018.

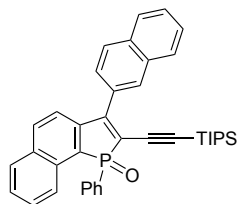

**3-(Naphthalen-2-yl)-1-phenyl-2-((triisopropylsilyl)ethynyl)benzo[g]phosphindole 1-oxide (3ha):** Synthesized from **1h** (40 mg, 0.10 mmol) and **2a** (52 mg, 0.20 mmol) according to the general procedure A, purified by silica gel column chromatography with hexane/ethyl acetate (2/1, v/v): 51 mg (88%, 0.10 mmol scale); Yellow solid; m.p. 105.8-106.5 °C;  $^1\text{H}$  NMR (400 MHz,  $\text{CDCl}_3$ )  $\delta$  8.21 (s, 1H), 8.13-8.11 (m, 1H), 8.02 (d,  $J = 8.5$  Hz, 1H), 7.97 (d,  $J = 8.5$  Hz, 1H), 7.93-7.83 (m, 5H), 7.77 (dd,  $J = 8.4, 1.6$  Hz, 1H), 7.65 (dd,  $J = 8.5, 2.7$  Hz, 1H), 7.59-7.48 (m, 5H), 7.46-7.41 (m, 2H), 0.97-0.84 (m, 21H);  $^{13}\text{C}\{^1\text{H}\}$  NMR (100 MHz,  $\text{CDCl}_3$ )  $\delta$  156.4 (d,  $J = 22.3$  Hz, 1C), 141.9 (d,  $J = 23.7$  Hz, 1C), 133.93 (d,  $J = 10.0$  Hz, 1C), 133.89 (1C), 133.7 (1C), 133.0 (1C), 132.5 (d,  $J = 2.8$  Hz, 1C), 132.4 (d,  $J$



= 8.6 Hz, 1C), 131.3 (1C), 131.2 (1C), 130.9 (d,  $J = 13.8$  Hz, 1C), 129.3 (d,  $J = 100.2$  Hz, 1C), 129.0 (1C), 128.9 (1C), 128.8 (1C), 128.75 (1C), 128.68 (1C), 128.5 (1C), 128.1 (1C), 127.8 (1C), 127.3 (1C), 127.1 (1C), 126.8 (d,  $J = 102.8$  Hz, 1C), 126.5 (1C), 126.2 (1C), 126.1 (d,  $J = 4.6$  Hz, 1C), 121.8 (d,  $J = 11.9$  Hz, 1C), 120.8 (d,  $J = 102.8$  Hz, 1C), 105.1 (d,  $J = 5.9$  Hz, 1C), 99.9 (d,  $J = 9.8$  Hz, 1C) 18.5 (6C), 11.3 (3C);  $^{31}\text{P}\{^1\text{H}\}$  NMR (162 MHz,  $\text{CDCl}_3$ )  $\delta$  36.96; HRMS (APCI)  $m/z$  ( $[\text{M}+\text{H}]^+$ ) calcd for  $\text{C}_{39}\text{H}_{40}\text{OPSi}$ : 583.2581, found: 583.2562.

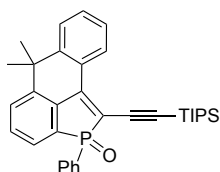

**6,6-Dimethyl-2-phenyl-1-((triisopropylsilyl)ethynyl)-6H-naphtho[1,2,3-cd]phosphindole 2-oxide (3ia):** Synthesized from **1i** (34 mg, 0.10 mmol) and **2a** (52 mg, 0.20 mmol) according to the general procedure A, purified by silica gel column chromatography with hexane/ethyl acetate (1/1, v/v): 51 mg (97%, 0.10 mmol scale); Yellow solid; m.p. 176.6-177.2 °C;  $^1\text{H}$  NMR (400 MHz,  $\text{CDCl}_3$ )  $\delta$  9.44 (dd,  $J = 2.0, 0.30$  Hz, 1H), 7.79-7.73 (m, 2H), 7.71-7.67 (m, 2H), 7.63-7.59 (m, 1H), 7.55-7.47 (m, 3H), 7.42-7.38 (m, 2H), 7.34-7.30 (m, 1H), 1.74 (s, 3H), 1.69 (s, 3H), 1.17-1.00 (m, 21H);  $^{13}\text{C}\{^1\text{H}\}$  NMR (100 MHz,  $\text{CDCl}_3$ )  $\delta$  146.5 (1C), 145.1 (d,  $J = 21.5$  Hz, 1C), 142.3 (d,  $J = 11.0$  Hz, 1C), 136.1 (d,  $J = 27.0$  Hz, 1C), 132.2 (d,  $J = 2.8$  Hz, 1C), 131.5 (1C), 131.4 (1C), 131.3 (1C), 130.9 (d,  $J = 13.8$  Hz, 1C), 130.8 (d,  $J = 3.4$  Hz, 1C), 130.5 (d,  $J = 11.4$  Hz, 1C), 129.61 (d,  $J = 103.6$  Hz, 1C), 129.60 (d,  $J = 104.6$  Hz, 1C), 128.6 (1C), 128.5 (1C), 128.0 (1C), 127.7 (d,  $J = 9.2$  Hz, 1C), 127.481 (1C), 127.479 (d,  $J = 14.7$  Hz, 1C), 111.4 (d,  $J = 106.3$  Hz, 1C), 109.2 (d,  $J = 6.4$  Hz, 1C), 102.1 (d,  $J = 8.2$  Hz, 1C), 38.7 (1C), 33.7 (1C), 32.7 (1C), 18.6 (6C), 11.3 (3C);  $^{31}\text{P}\{^1\text{H}\}$  NMR (162 MHz,  $\text{CDCl}_3$ )  $\delta$  38.79; HRMS (APCI)  $m/z$  ( $[\text{M}+\text{H}]^+$ ) calcd for  $\text{C}_{34}\text{H}_{40}\text{OPSi}$ : 523.2581, found: 523.2588.

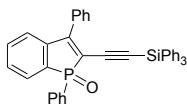

**1,3-Diphenyl-2-((triphenylsilyl)ethynyl)phosphindole 1-oxide (3ab):** Synthesized from **1a** (31 mg, 0.10 mmol) and **2b** (73 mg, 0.20 mmol) according to the general procedure A, purified by silica gel column chromatography with hexane/ethyl acetate (1/2, v/v) and GPC ( $\text{CHCl}_3$ ): 35 mg (59%, 0.10 mmol scale); Pale yellow solid; m.p. 228.6-229.2 °C;  $^1\text{H}$  NMR (400 MHz,  $\text{CDCl}_3$ )  $\delta$  7.85-7.75 (m, 3H), 7.66-7.64 (m, 2H), 7.61-7.57 (m, 1H), 7.55-7.42 (m, 14H), 7.39-7.34 (m, 3H), 7.28-7.24 (m, 6H);

$^{13}\text{C}\{^1\text{H}\}$  NMR (100 MHz,  $\text{CDCl}_3$ )  $\delta$  159.0 (d,  $J = 20.4$  Hz, 1C), 142.2 (d,  $J = 24.5$  Hz, 1C), 135.5 (6C), 133.2 (d,  $J = 1.8$  Hz, 1C), 133.1 (d,  $J = 12.9$  Hz, 1C), 133.0 (3C), 132.7 (d,  $J = 2.8$  Hz, 1C), 131.4 (1C), 131.3 (1C), 131.1 (d,  $J = 105.5$  Hz, 1C), 130.3 (d,  $J = 10.8$  Hz, 1C), 129.9 (d,  $J = 9.1$  Hz, 1C), 129.84 (3C), 129.76 (1C), 129.0 (1C), 128.92 (2C), 128.88 (1C), 128.8 (d,  $J = 104.1$  Hz, 1C), 128.6 (2C), 127.9 (6C), 125.0 (d,  $J = 10.3$  Hz, 1C), 118.9 (d,  $J = 102.2$  Hz, 1C), 102.1 (d,  $J = 9.5$  Hz, 1C), 102.0 (d,  $J = 5.5$  Hz, 1C);  $^{31}\text{P}\{^1\text{H}\}$  NMR (162 MHz,  $\text{CDCl}_3$ )  $\delta$  36.48; HRMS (APCI)  $m/z$  ( $[\text{M}+\text{H}]^+$ ) calcd for  $\text{C}_{40}\text{H}_{30}\text{OPSi}$ : 585.1798, found: 585.1799.

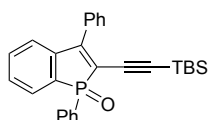

**2-((*tert*-Butyldimethylsilyl)ethynyl)-1,3-diphenylphosphindole 1-oxide (3ac):** Synthesized from **1a** (31 mg, 0.10 mmol) and **2c** (52 mg, 0.20 mmol) according to the general procedure A, purified by silica gel column chromatography with hexane/ethyl acetate (1/2, v/v) and GPC ( $\text{CHCl}_3$ ): 20 mg (46%, 0.10 mmol scale); Yellow solid; m.p. 145.2-145.9  $^\circ\text{C}$ ;  $^1\text{H}$  NMR (400 MHz,  $\text{CDCl}_3$ )  $\delta$  7.84-7.78 (m, 2H), 7.77-7.72 (m, 1H), 7.63-7.60 (m, 2H), 7.59-7.54 (m, 1H), 7.53-7.42 (m, 8H), 0.77 (s, 9H), 0.015 (s, 3H), 0.00 (s, 3H);  $^{13}\text{C}\{^1\text{H}\}$  NMR (100 MHz,  $\text{CDCl}_3$ )  $\delta$  157.4 (d,  $J = 20.7$  Hz, 1C), 142.2 (d,  $J = 24.4$  Hz, 1C), 133.1 (d,  $J = 13.2$  Hz, 1C), 133.0 (d,  $J = 1.2$  Hz, 1C), 132.5 (d,  $J = 2.8$  Hz, 1C), 131.2 (1C), 131.1 (1C), 131.0 (d,  $J = 105.2$  Hz, 1C), 129.9 (d,  $J = 10.7$  Hz, 1C), 129.8 (d,  $J = 9.4$  Hz, 1C), 129.5 (1C), 129.0 (d,  $J = 103.9$  Hz, 1C), 128.8 (2C+1C), 128.7 (1C), 128.4 (2C), 124.7 (d,  $J = 10.3$  Hz, 1C), 119.3 (d,  $J = 103.0$  Hz, 1C), 106.6 (d,  $J = 5.6$  Hz, 1C), 98.2 (d,  $J = 9.4$  Hz, 1C), 25.9 (3C), 16.6 (1C), -4.94 (2C);  $^{31}\text{P}\{^1\text{H}\}$  NMR (162 MHz,  $\text{CDCl}_3$ )  $\delta$  36.32; HRMS (APCI)  $m/z$  ( $[\text{M}+\text{H}]^+$ ) calcd for  $\text{C}_{28}\text{H}_{30}\text{OPSi}$ : 441.1798, found: 441.1798.

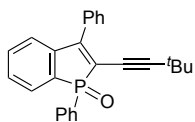

**2-(3,3-Dimethylbut-1-yn-1-yl)-1,3-diphenylphosphindole 1-oxide (3ad):** Synthesized from **1a** (31 mg, 0.10 mmol) and **2d** (32 mg, 0.20 mmol) according to the general procedure A, purified by silica gel column chromatography with hexane/ethyl acetate (1/2, v/v): 12 mg (30%, 0.10 mmol scale); Pale yellow solid; m.p. 184.3-185.0  $^\circ\text{C}$ ;  $^1\text{H}$  NMR (400 MHz,  $\text{CDCl}_3$ )  $\delta$  7.83-7.77 (m, 2H), 7.75-7.70 (m, 1H), 7.62-7.60 (m, 2H), 7.58-7.53 (m, 1H), 7.51-7.39 (m, 8H), 1.12 (s, 9H);  $^{13}\text{C}\{^1\text{H}\}$  NMR (100 MHz,

CDCl<sub>3</sub>)  $\delta$  154.9 (d,  $J$  = 21.7 Hz, 1C), 142.5 (d,  $J$  = 24.9 Hz, 1C), 133.3 (d,  $J$  = 13.5 Hz, 1C), 132.9 (d,  $J$  = 1.9 Hz, 1C), 132.4 (d,  $J$  = 2.8 Hz, 1C), 131.2 (1C), 131.1 (1C), 130.9 (d,  $J$  = 105.0 Hz, 1C), 129.7 (d,  $J$  = 9.1 Hz, 1C), 129.39 (d,  $J$  = 10.7 Hz, 1C), 129.38 (d,  $J$  = 102.1 Hz, 1C), 129.3 (1C), 128.9 (2C), 128.8 (1C), 128.7 (1C), 128.2 (2C), 124.2 (d,  $J$  = 10.4 Hz, 1C), 119.8 (d,  $J$  = 104.9 Hz, 1C), 112.3 (d,  $J$  = 7.0 Hz, 1C), 72.6 (d,  $J$  = 9.6 Hz, 1C), 30.5 (3C), 28.6 (1C); <sup>31</sup>P{<sup>1</sup>H} NMR (162 MHz, CDCl<sub>3</sub>)  $\delta$  36.17; HRMS (APCI)  $m/z$  ([M+H]<sup>+</sup>) calcd for C<sub>26</sub>H<sub>24</sub>OP: 383.1559, found: 383.1559.

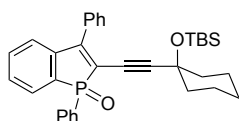

**2-((1-((*tert*-Butyldimethylsilyloxy)cyclohexyl)ethynyl)-1,3-diphenylphosphindole 1-oxide (3ae):**

Synthesized from **1a** (31 mg, 0.10 mmol) and **2e** (63 mg, 0.20 mmol) according to the general procedure A, purified by silica gel column chromatography with hexane/ethyl acetate (2/1, v/v) and GPC (CHCl<sub>3</sub>): 13 mg (25%, 0.10 mmol scale); White solid; m.p. 115.8-116.4 °C; <sup>1</sup>H NMR (400 MHz, CDCl<sub>3</sub>)  $\delta$  7.82-7.77 (m, 2H), 7.70-7.66 (m, 1H), 7.58-7.34 (m, 11H), 1.71-1.13 (m, 10H), 0.73 (s, 9H), -0.20 (s, 3H), -0.23 (s, 3H); <sup>13</sup>C{<sup>1</sup>H} NMR (100 MHz, CDCl<sub>3</sub>)  $\delta$  156.9 (d,  $J$  = 21.2 Hz, 1C), 142.4 (d,  $J$  = 24.2 Hz, 1C), 133.5 (d,  $J$  = 13.2 Hz, 1C), 133.0 (d,  $J$  = 1.8 Hz, 1C), 132.5 (d,  $J$  = 2.8 Hz, 1C), 131.5 (d,  $J$  = 105.0 Hz, 1C), 131.4 (1C), 131.3 (1C), 129.8 (d,  $J$  = 10.8 Hz, 1C), 129.6 (d,  $J$  = 9.5 Hz, 1C), 129.4 (1C), 128.9 (1C), 128.8 (1C), 128.71 (2C), 128.69 (d,  $J$  = 102.8 Hz, 1C), 128.5 (2C), 124.3 (d,  $J$  = 10.3 Hz, 1C), 119.3 (d,  $J$  = 103.9 Hz, 1C), 105.5 (d,  $J$  = 6.6 Hz, 1C), 78.4 (d,  $J$  = 11.4 Hz, 1C), 70.0 (1C), 40.9 (2C), 25.7 (3C), 25.1 (1C), 22.7 (2C), 17.9 (1C), -3.25 (1C), -3.35 (1C); <sup>31</sup>P{<sup>1</sup>H} NMR (162 MHz, CDCl<sub>3</sub>)  $\delta$  36.02; HRMS (APCI)  $m/z$  ([M+H]<sup>+</sup>) calcd for C<sub>34</sub>H<sub>40</sub>O<sub>2</sub>PSi: 539.2530, found: 539.2520.

**Protodesilylation of 3aa (Scheme 3)**

In a Schlenk tube, 1,3-diphenyl-2-((triisopropylsilyl)ethynyl)phosphindole 1-oxide (**3aa**; 48 mg, 1.0 mmol) was dissolved in THF (1.0 mL), and MeOH (0.10 mmol, 4.1  $\mu$ L) was added under N<sub>2</sub>. The tube was cooled to 0 °C with an ice bath, and tetrabutylammonium fluoride (TBAF, 1 mol/L in THF, 0.105 mmol, 0.105 mL) was slowly added. The mixture was stirred at 0 °C for 30 min. After quenching with water, extraction with ethyl acetate three times, filtration through a short pad of Na<sub>2</sub>SO<sub>4</sub> and cerite, and evaporation under reduced pressure formed a crude material. The residue was purified by silica gel

column chromatography with hexane/EtOAc (1:2, v/v) to give 2-ethynyl-1,3-diphenylphosphindole 1-oxide (**4**; 83%, 27.5 mg).

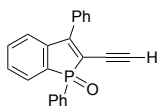

**2-Ethynyl-1,3-diphenylphosphindole 1-oxide (4):** Purified by silica gel column chromatography with hexane/ethyl acetate (1/2, v/v): 28 mg (83%, 0.10 mmol scale); Brown solid; m.p. 228.3-229.0 °C; <sup>1</sup>H NMR (400 MHz, CDCl<sub>3</sub>) δ 7.84-7.78 (m, 2H), 7.75-7.71 (m, 1H), 7.63-7.41 (m, 11H), 3.36 (d, *J* = 4.2 Hz, 1H); <sup>13</sup>C{<sup>1</sup>H} NMR (100 MHz, CDCl<sub>3</sub>) δ 158.7 (d, *J* = 20.3 Hz, 1C), 141.9 (d, *J* = 24.6 Hz, 1C), 133.2 (1C), 132.9 (d, *J* = 13.1 Hz, 1C), 132.7 (d, *J* = 2.8 Hz, 1C), 131.24 (d, *J* = 105.5 Hz, 1C), 131.21 (1C), 131.1 (1C), 130.2 (d, *J* = 10.8 Hz, 1C), 129.8 (1C), 129.7 (d, *J* = 9.5 Hz, 1C), 129.0 (1C), 128.9 (1C), 128.6 (2C+2C), 128.4 (d, *J* = 102.0 Hz, 1C), 124.9 (d, *J* = 10.4 Hz, 1C), 118.1 (d, *J* = 103.8 Hz, 1C), 89.1 (d, *J* = 6.7 Hz, 1C), 76.6 (d, *J* = 9.9 Hz, 1C); <sup>31</sup>P{<sup>1</sup>H} NMR (162 MHz, CDCl<sub>3</sub>) δ 36.90; HRMS (APCI) *m/z* ([*M*+*H*]<sup>+</sup>) calcd for C<sub>22</sub>H<sub>16</sub>OP: 327.0933, found: 327.0914.

### Protodesilylation/Cu-Catalysed Azide-Alkyne Cycloaddition of **3aa** (Scheme 3)

In a Schlenk tube, 1,3-diphenyl-2-((triisopropylsilyl)ethynyl)phosphindole 1-oxide (**3aa**; 48 mg, 0.10 mmol) was dissolved in THF (1.0 mL), and MeOH (0.10 mmol, 4.1 μL) was added under N<sub>2</sub>. The tube was cooled to 0 °C with an ice bath, and tetrabutylammonium fluoride (TBAF, 1 mol/L in THF, 0.105 mmol, 0.105 mL) was slowly added. The mixture was stirred at 0 °C for 30 min. After quenching with water, extraction with ethyl acetate three times, filtration through a short pad of Na<sub>2</sub>SO<sub>4</sub> and cerite, and evaporation under reduced pressure formed a crude material. The residue was directly transferred to another Schlenk tube. CuI (3.8 mg, 0.020 mmol), THF (1.0 mL), DIPEA (3.5 μL, 0.20 mmol), and benzyl azide (13 mg, 0.10 mmol) were added under N<sub>2</sub>. The mixture was stirred at room temperature for 28 h. After quenching with water, extraction with ethyl acetate three times, filtration through a short pad of Na<sub>2</sub>SO<sub>4</sub> and cerite, and evaporation under reduced pressure formed a crude material. The residue was purified by column chromatography on silica gel with ethyl acetate then GPC (CHCl<sub>3</sub>) to give 2-(1-benzyl-1*H*-1,2,3-triazol-4-yl)-1,3-diphenylphosphindole 1-oxide (**5**; 37.5 mg, 0.082 mmol) in 81% yield.

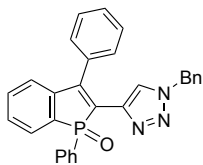

**2-(1-Benzyl-1H-1,2,3-triazol-4-yl)-1,3-diphenylphosphindole 1-oxide (5):** Purified by silica gel column chromatography with ethyl acetate and GPC (CHCl<sub>3</sub>): 38 mg (81%, 0.10 mmol scale); White solid; m.p. 208.6-209.2 °C; <sup>1</sup>H NMR (400 MHz, CDCl<sub>3</sub>) δ 7.89-7.84 (m, 2H), 7.73 (dd, *J* = 9.2, 7.2 Hz, 1H), 7.67-7.25 (m, 13H), 7.12-7.03 (m, 3H), 6.80 (s, 1H), 5.33 (d, *J* = 14.9 Hz, 1H) 5.26 (d, *J* = 14.9 Hz, 1H); <sup>13</sup>C{<sup>1</sup>H} NMR (100 MHz, CDCl<sub>3</sub>) δ 149.4 (d, *J* = 18.9 Hz, 1C), 143.9 (d, *J* = 25.7 Hz, 1C), 141.0 (d, *J* = 11.1 Hz, 1C), 134.4 (d, *J* = 14.3 Hz, 1C), 134.3 (1C), 133.0 (d, *J* = 1.8 Hz, 1C), 132.2 (d, *J* = 2.8 Hz, 1C), 131.8 (d, *J* = 106.4 Hz, 1C), 131.4 (1C), 131.3 (1C), 129.9 (d, *J* = 102.2 Hz, 1C), 129.3 (d, *J* = 2.8 Hz, 1C), 129.24 (2C), 129.22 (d, *J* = 4.2 Hz, 1C), 129.0 (1C), 128.9 (2C), 128.8 (1C), 128.64 (1C), 128.60 (1C), 128.2 (2C), 128.0 (2C), 125.6 (d, *J* = 98.1 Hz, 1C), 124.0 (d, *J* = 10.6 Hz, 1C), 122.4 (d, *J* = 6.8 Hz, 1C), 53.9 (1C); <sup>31</sup>P{<sup>1</sup>H} NMR (162 MHz, CDCl<sub>3</sub>) δ 38.63; HRMS (APCI) *m/z* ([*M*+*H*]<sup>+</sup>) calcd for C<sub>29</sub>H<sub>23</sub>N<sub>3</sub>OP: 460.1573, found: 460.1566.

### Protodesilylation/Cu-Catalysed Glaser Coupling of 3aa (Scheme 3)

In a Schlenk tube, 1,3-diphenyl-2-((triisopropylsilyl)ethynyl)phosphindole 1-oxide (**3aa**; 48 mg, 0.10 mmol) was dissolved in THF (1.0 mL), and MeOH (0.10 mmol, 4.1 μL) was added under N<sub>2</sub>. The tube was cooled to 0 °C with an ice bath, and tetrabutylammonium fluoride (TBAF, 1 mol/L in THF, 0.105 mmol, 0.105 mL) was slowly added. The mixture was stirred at 0 °C for 30 min. After quenching with water, extraction with ethyl acetate three times, filtration through a short pad of Na<sub>2</sub>SO<sub>4</sub> and cerite, and evaporation under reduced pressure formed a crude material. The residue was directly transferred to another Schlenk tube. In a vial, CuCl (2.0 mg, 0.020 mmol) and TMEDA (2.0 μL, 0.013 mmol) were dissolved in acetone (0.050 mL) under N<sub>2</sub>. The mixture was stirred at room temperature for 15 minutes. The mixture was transferred to the Schlenk tube with acetone (0.050 mL). The mixture was stirred at room temperature for 1 h under O<sub>2</sub> (1 atm, balloon). After quenching with water, extraction with CHCl<sub>3</sub> three times, filtration through a short pad of Na<sub>2</sub>SO<sub>4</sub> and cerite, and evaporation under reduced pressure formed a crude material. The residue was purified by column chromatography on silica gel with ethyl acetate to give 2,2'-(buta-1,3-diyne-1,4-diyl)bis(1,3-diphenylphosphindole 1-oxide) (**6**; 31.9 mg, 0.049 mmol) in 97% yield.

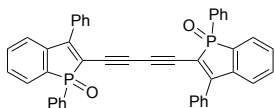

**2,2'-(Buta-1,3-diyne-1,4-diyl)bis(1,3-diphenylphosphindole 1-oxide) (6, 1:1 diastereomixture):**

Purified by silica gel column chromatography with ethyl acetate: 32 mg (97%, 0.050 mmol scale); Yellow solid; m.p. 128.4-129.1 °C;  $^1\text{H}$  NMR (400 MHz,  $\text{CDCl}_3$ )  $\delta$  7.82-7.76-7.67 (m, 6H), 7.59-7.42 (m, 22H);  $^{13}\text{C}\{^1\text{H}\}$  NMR (100 MHz,  $\text{CDCl}_3$ )  $\delta$  160.4 (d,  $J = 20.8$  Hz, 2C), 160.2 (d,  $J = 20.7$  Hz, 2C), 141.7 (d,  $J = 23.9$  Hz, 4C), 133.3 (4C), 132.85 (d,  $J = 2.6$  Hz, 4C), 132.81 (d,  $J = 11.0$  Hz, 4C), 131.4 (d,  $J = 105.1$  Hz, 4C), 131.2 (4C), 131.1 (4C), 130.5 (d,  $J = 10.8$  Hz, 4C), 130.1 (4C), 129.8 (d,  $J = 9.4$  Hz, 4C), 129.1 (4C), 129.0 (4C), 128.8 (4C), 128.6 (8C), 128.3 (d,  $J = 103.7$  Hz, 2C), 128.2 (d,  $J = 103.3$  Hz, 2C), 125.1 (d,  $J = 10.1$  Hz, 4C), 117.8 (d,  $J = 101.9$  Hz, 4C), 85.4 (dd,  $J = 6.6, 5.1$  Hz, 2C), 85.3 (dd,  $J = 6.5, 5.1$  Hz, 2C), 78.94 (d,  $J = 8.7$  Hz, 2C), 78.85 (d,  $J = 8.4$  Hz, 2C);  $^{31}\text{P}\{^1\text{H}\}$  NMR (162 MHz,  $\text{CDCl}_3$ )  $\delta$  36.46, 36.42; HRMS (APCI)  $m/z$  ( $[\text{M}+\text{H}]^+$ ) calcd for  $\text{C}_{44}\text{H}_{29}\text{O}_2\text{P}_2$ : 651.1637, found: 651.1610.

**Cyclization of 1,3-Diyne 4 with TIPS-SH (Scheme 3)**

2,2'-(Buta-1,3-diyne-1,4-diyl)bis(1,3-diphenylphosphindole 1-oxide) (**6**; 33 mg, 0.050 mmol) and CsF (36 mg, 0.20 mmol) were placed in a Schlenk tube, which was filled with  $\text{N}_2$  by using the standard Schlenk technique. DMF (2.0 mL) and triisopropylsilanethiol (19 mg, 0.10 mmol) were finally added via syringe. The mixture was stirred at room temperature for 4 h. After quenching with water, extraction with ethyl acetate three times, filtration through a short pad of  $\text{Na}_2\text{SO}_4$  and cerite, and evaporation under reduced pressure formed a crude material. The residue was purified by preparative thin-layer chromatography with ethyl acetate and GPC ( $\text{CHCl}_3$ ) to give (1*R'*,1*S'*)-2,2'-(Thiophene-2,5-diyl)bis(1,3-diphenylphosphindole 1-oxide) (*syn*-**7**; 5.9 mg, 0.0086 mmol) in 17% yield and (1*R'*,1*R'*)-2,2'-(thiophene-2,5-diyl)bis(1,3-diphenylphosphindole 1-oxide) (*anti*-**7**; 6.7 mg, 0.0098 mmol) in 19% yield.

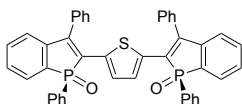

**(1*R'*,1*S'*)-2,2'-(Thiophene-2,5-diyl)bis(1,3-diphenylphosphindole 1-oxide) (*syn*-**7**):** Purified by preparative thin-layer chromatography with ethyl acetate and GPC ( $\text{CHCl}_3$ ): 5.9 mg (17%, 0.050 mmol scale); Orange solid; m.p. 139.1-139.8 °C;  $^1\text{H}$  NMR (400 MHz,  $\text{CDCl}_3$ )  $\delta$  7.71-7.66 (m, 4H), 7.58 (dd,

$J = 9.8, 7.1$  Hz, 2H), 7.51-7.47 (m, 4H), 7.44-7.34 (m, 10H), 7.30-7.25 (m, 2H), 7.19-7.17 (m, 4H), 7.02 (s, 2H), 6.87 (dd,  $J = 7.6, 2.9$  Hz, 2H);  $^{13}\text{C}\{^1\text{H}\}$  NMR (100 MHz,  $\text{CDCl}_3$ )  $\delta$  147.0 (d,  $J = 20.4$  Hz, 2C), 144.4 (d,  $J = 25.7$  Hz, 2C), 137.1 (d,  $J = 14.1$  Hz, 2C), 133.6 (d,  $J = 14.3$  Hz, 2C), 133.1 (d,  $J = 1.9$  Hz, 2C), 132.2 (d,  $J = 2.8$  Hz, 2C), 131.3 (d,  $J = 106.8$  Hz, 2C), 131.0 (2C), 130.9 (2C), 130.0 (d,  $J = 99.2$  Hz, 2C), 129.44 (4C), 129.39 (2C), 129.2 (2C), 129.0 (2C), 128.9 (2C), 128.816 (d,  $J = 21.0$  Hz, 2C), 128.812 (2C), 128.6 (4C), 128.4 (d,  $J = 95.2$  Hz, 2C), 123.8 (d,  $J = 10.6$  Hz, 2C);  $^{31}\text{P}\{^1\text{H}\}$  NMR (162 MHz,  $\text{CDCl}_3$ )  $\delta$  38.34; HRMS (APCI)  $m/z$  ( $[\text{M}+\text{H}]^+$ ) calcd for  $\text{C}_{44}\text{H}_{31}\text{O}_2\text{P}_2\text{S}$ : 685.1515, found: 685.1520.

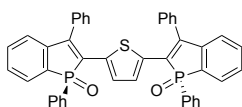

**(1R',1'R')-2,2'-(Thiophene-2,5-diyl)bis(1,3-diphenylphosphindole 1-oxide) (*anti*-7):** Purified by preparative thin-layer chromatography with ethyl acetate and GPC ( $\text{CHCl}_3$ ): 6.7 mg (19%, 0.050 mmol scale); Orange solid; m.p. 143.8-144.4 °C;  $^1\text{H}$  NMR (400 MHz,  $\text{CDCl}_3$ )  $\delta$  7.76-7.70 (m, 4H), 7.58 (dd,  $J = 10.0, 7.5$  Hz, 2H), 7.54-7.47 (m, 4H), 7.44-7.33 (m, 10H), 7.29-7.24 (m, 2H), 7.14 (d,  $J = 7.2$  Hz, 4H), 7.11 (s, 2H), 6.83 (dd,  $J = 7.6, 2.9$  Hz, 2H);  $^{13}\text{C}\{^1\text{H}\}$  NMR (100 MHz,  $\text{CDCl}_3$ )  $\delta$  146.6 (d,  $J = 20.3$  Hz, 2C), 144.5 (d,  $J = 25.9$  Hz, 2C), 137.3 (d,  $J = 15.1$  Hz, 2C), 133.4 (d,  $J = 14.2$  Hz, 2C), 133.1 (d,  $J = 2.3$  Hz, 2C), 132.4 (d,  $J = 2.8$  Hz, 2C), 131.1 (d,  $J = 106.9$  Hz, 2C), 130.9 (2C), 130.8 (2C), 130.0 (d,  $J = 99.2$  Hz, 2C), 129.8 (d,  $J = 5.0$  Hz, 2C), 129.4 (4C), 129.3 (2C), 129.1 (2C), 129.0 (2C), 128.9 (d,  $J = 5.5$  Hz, 2C), 128.8 (d,  $J = 6.4$  Hz, 2C), 128.6 (4C), 128.3 (d,  $J = 93.3$  Hz, 2C), 123.8 (d,  $J = 10.9$  Hz, 2C);  $^{31}\text{P}\{^1\text{H}\}$  NMR (162 MHz,  $\text{CDCl}_3$ )  $\delta$  38.76; HRMS (APCI)  $m/z$  ( $[\text{M}+\text{H}]^+$ ) calcd for  $\text{C}_{44}\text{H}_{31}\text{O}_2\text{P}_2\text{S}$ : 685.1515, found: 685.1524.

### Desilylative Sonogashira Coupling of **3aa** with Aryl Iodides (Scheme 3, **3ag**)

In a Schlenk tube, 1,3-diphenyl-2-((triisopropylsilyl)ethynyl)phosphindole 1-oxide (**3aa**; 48 mg, 0.10 mmol), 4-iodotoluene (44 mg, 0.20 mmol),  $\text{PdCl}_2(\text{PPh}_3)_2$  (7.1 mg, 0.010 mmol),  $\text{CuI}$  (3.8 mg, 0.020 mmol) were dissolved in THF (1.0 mL), and  $\text{Et}_3\text{N}$  (0.18 mL, 1.3 mmol) was added under  $\text{N}_2$ . The tube was cooled to 0 °C with an ice bath, and tetrabutylammonium fluoride (TBAF, 1 mol/L in THF, 0.105 mmol, 0.105 mL) was slowly added. The mixture was stirred at 0 °C for 30 min and then heated at 50 °C for 16.5 h (oil bath). The resulting mixture was cooled to room temperature. After quenching with water, extraction with ethyl acetate three times, filtration through a short pad of  $\text{Na}_2\text{SO}_4$  and cerite, and evaporation under reduced pressure formed a crude material. The residue was purified by column

chromatography on silica gel with hexane/ethyl acetate (1:2, v/v) to give 1,3-diphenyl-2-(*p*-tolylethynyl)phosphindole 1-oxide (**3ag**; 31.7 mg, 0.076 mmol) in 76% yield.

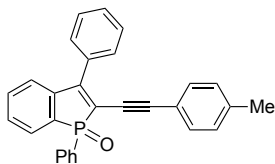

**1,3-Diphenyl-2-(*p*-tolylethynyl)phosphindole 1-oxide (3ag):** Purified by silica gel column chromatography with hexane/ethyl acetate (1/2, v/v): 32 mg (76%, 0.10 mmol scale); Yellow solid; m.p. 157.8-158.5 °C; <sup>1</sup>H NMR (400 MHz, CDCl<sub>3</sub>) δ 7.88-7.83 (m, 2H), 7.76-7.69 (m, 3H), 7.58-7.41 (m, 9H), 7.18 (d, *J* = 7.9 Hz, 2H), 7.05 (d, *J* = 7.9 Hz, 2H), 2.30 (s, 3H); <sup>13</sup>C{<sup>1</sup>H} NMR (100 MHz, CDCl<sub>3</sub>) δ 155.9 (d, *J* = 21.2 Hz, 1C), 142.4 (d, *J* = 24.3 Hz, 1C), 139.0 (1C), 133.4 (d, *J* = 13.2 Hz, 1C), 133.1 (d, *J* = 1.4 Hz, 1C), 132.6 (d, *J* = 2.8 Hz, 1C), 131.78 (1C), 131.76 (1C), 131.3 (d, *J* = 105.1 Hz, 1C), 131.2 (1C), 131.1 (1C), 129.8 (1C), 129.7 (d, *J* = 2.0 Hz, 1C), 129.6 (1C), 129.0 (d, *J* = 103.6 Hz, 1C), 129.0 (3C), 128.94 (2C), 128.86 (1C), 128.5 (2C), 124.5 (d, *J* = 10.4 Hz, 1C), 119.8 (d, *J* = 2.2 Hz, 1C), 119.1 (d, *J* = 103.9 Hz, 1C), 101.5 (d, *J* = 6.6 Hz, 1C), 82.8 (d, *J* = 9.6 Hz, 1C), 21.6 (1C); <sup>31</sup>P{<sup>1</sup>H} NMR (162 MHz, CDCl<sub>3</sub>) δ 36.34; HRMS (APCI) *m/z* ([*M*+*H*]<sup>+</sup>) calcd for C<sub>29</sub>H<sub>22</sub>OP: 417.1403, found: 417.1390.

### Desilylative Sonogashira Coupling of **3aa** with Aryl Iodides (Scheme 3, **3ah**)

In a Schlenk tube, 1,3-Diphenyl-2-((triisopropylsilyl)ethynyl)phosphindole 1-oxide (**3aa**; 483 mg, 1.0 mmol), 4-iodoanisole (468 mg, 2.0 mmol), PdCl<sub>2</sub>(PPh<sub>3</sub>)<sub>2</sub> (72 mg, 0.10 mmol), CuI (38 mg, 0.20 mmol) were dissolved in THF (1.0 mL), and Et<sub>3</sub>N (1.8 mL, 13 mmol) was added under N<sub>2</sub>. The tube was cooled to 0 °C with an ice bath, and tetrabutylammonium fluoride (TBAF, 1 mol/L in THF, 1.05 mmol, 1.05 mL) was slowly added. The mixture was stirred at 0 °C for 30 min and then heated at 50 °C for 16.5 h (oil bath). The resulting mixture was cooled to room temperature. After quenching with water, extraction with ethyl acetate three times, filtration through a short pad of Na<sub>2</sub>SO<sub>4</sub> and cerite, and evaporation under reduced pressure formed a crude material. The residue was purified by column chromatography on silica gel with hexane/ethyl acetate (1:2, v/v) to give 2-((4-methoxyphenyl)ethynyl)-1,3-diphenylphosphindole 1-oxide (**3ah**; 326 mg, 0.75 mmol) in 75% yield.



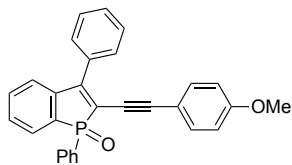

**2-((4-Methoxyphenyl)ethynyl)-1,3-diphenylphosphindole 1-oxide (3ah):** Purified by silica gel column chromatography with hexane/ethyl acetate (1/2, v/v): 326 mg (75%, 1.0 mmol scale); Yellow solid; m.p. 167.8-168.5 °C;  $^1\text{H}$  NMR (400 MHz,  $\text{CDCl}_3$ )  $\delta$  7.85-7.83 (m, 2H), 7.76-7.68 (m, 3H), 7.58-7.40 (m, 9H), 7.26-7.21 (m, 2H), 6.79-6.75 (m, 2H), 3.78 (s, 3H);  $^{13}\text{C}\{^1\text{H}\}$  NMR (100 MHz,  $\text{CDCl}_3$ )  $\delta$  160.0 (1C), 155.3 (d,  $J = 21.2$  Hz, 1C), 142.5 (d,  $J = 24.6$  Hz, 1C), 133.4 (d,  $J = 13.1$  Hz, 1C), 133.45 (1C), 133.43 (1C), 133.1 (d,  $J = 1.6$  Hz, 1C), 132.6 (d,  $J = 2.8$  Hz, 1C), 131.3 (d,  $J = 105.3$  Hz, 1C), 131.2 (1C), 131.1 (1C), 129.7 (d,  $J = 9.0$  Hz, 1C), 129.6 (d,  $J = 10.4$  Hz, 1C), 129.5 (1C), 129.1 (d,  $J = 103.3$  Hz, 1C), 129.0 (1C), 128.9 (2C), 128.8 (1C), 128.5 (2C), 124.3 (d,  $J = 10.3$  Hz, 1C), 119.2 (d,  $J = 103.8$  Hz, 1C), 115.0 (d,  $J = 2.4$  Hz, 1C), 113.9 (2C), 101.5 (d,  $J = 6.6$  Hz, 1C), 82.2 (d,  $J = 9.5$  Hz, 1C), 55.3 (1C);  $^{31}\text{P}\{^1\text{H}\}$  NMR (162 MHz,  $\text{CDCl}_3$ )  $\delta$  36.34; HRMS (APCI)  $m/z$  ( $[\text{M}+\text{H}]^+$ ) calcd for  $\text{C}_{29}\text{H}_{22}\text{O}_2\text{P}$ : 433.1352, found: 433.1338.

### Pt-Catalysed Cycloisomerization of 3ah (Scheme 3)

In a Schlenk tube, 2-((4-methoxyphenyl)ethynyl)-1,3-diphenylphosphindole 1-oxide (**3ah**; 22 mg, 0.050 mmol) and  $\text{PtCl}_2$  (2.7 mg, 0.010 mmol) were dissolved in TCE (1.0 mL) under  $\text{N}_2$ . The mixture was refluxed at 150 °C for 20 h (oil bath). The resulting mixture was cooled to room temperature. After quenching with water, extraction with ethyl acetate three times, filtration through a short pad of  $\text{Na}_2\text{SO}_4$  and cerite, and evaporation under reduced pressure formed a crude material. The residue was purified by column chromatography on silica gel with hexane/ethyl acetate (1:2, v/v) to give 6-(4-methoxyphenyl)-7-phenyldibenzo[*b,e*]phosphindole 7-oxide (**8**; 18 mg, 0.042 mmol) in 83% yield.

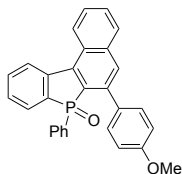

**6-(4-Methoxyphenyl)-7-phenyldibenzo[*b,e*]phosphindole 7-oxide (8):** Purified by silica gel column chromatography with hexane/ethyl acetate (1/2, v/v): 18 mg (83%, 0.050 mmol scale); Yellow solid;

m.p. 189.9-190.5 °C;  $^1\text{H}$  NMR (400 MHz,  $\text{CDCl}_3$ )  $\delta$  8.90 (d,  $J = 8.5$  Hz, 1H), 8.54 (dd,  $J = 8.0, 3.3$  Hz, 1H), 7.93 (dd,  $J = 7.9, 1.2$  Hz, 1H), 7.77-7.61 (m, 5H), 7.46-7.38 (m, 3H), 7.32-7.28 (m, 1H), 7.19-7.09 (m, 4H), 6.88-6.85 (m, 2H), 3.86 (s, 3H);  $^{13}\text{C}\{^1\text{H}\}$  NMR (100 MHz,  $\text{CDCl}_3$ )  $\delta$  159.3 (1C), 142.9 (d,  $J = 21.6$  Hz, 1C), 141.1 (d,  $J = 8.8$  Hz, 1C), 139.8 (d,  $J = 21.5$  Hz, 1C), 137.0 (d,  $J = 1.4$  Hz, 1C), 134.3 (d,  $J = 106.4$  Hz, 1C), 133.0 (d,  $J = 1.6$  Hz, 1C), 132.4 (d,  $J = 101.4$  Hz, 1C), 131.6 (d,  $J = 3.1$  Hz, 1C), 131.5 (d,  $J = 2.7$  Hz, 1C), 131.2 (2C), 130.9 (1C), 130.8 (1C), 130.5 (d,  $J = 9.1$  Hz, 1C), 130.2 (d,  $J = 9.6$  Hz, 1C), 130.0 (d,  $J = 105.9$  Hz, 1C), 129.5 (1C), 128.9 (d,  $J = 11.2$  Hz, 1C), 128.3 (d,  $J = 11.0$  Hz, 1C), 128.0 (1C), 127.9 (2C), 127.4 (1C), 125.4 (d,  $J = 10.4$  Hz, 1C), 124.7 (1C), 113.2 (2C), 55.3 (1C);  $^{31}\text{P}\{^1\text{H}\}$  NMR (162 MHz,  $\text{CDCl}_3$ )  $\delta$  33.20; HRMS (APCI)  $m/z$  ( $[\text{M}+\text{H}]^+$ ) calcd for  $\text{C}_{29}\text{H}_{22}\text{O}_2\text{P}$ : 433.1352, found: 433.1364.

## X-Ray Analysis

The single X-ray quality crystals of **3ac** were grown from pentane/ $\text{CHCl}_3$  by slow evaporation at room temperature. The structure was refined by full-matrix least-squares method using SHELXL-2017/1.

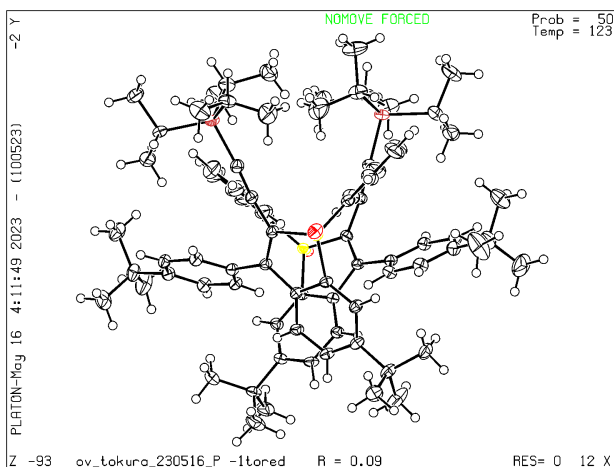

**Figure S1.** ORTEP drawing of **3ac** (CCDC 2279968, 50% thermal probability).

**Table S1.** Crystal data for **3ac**

|                               |            |
|-------------------------------|------------|
| Crystal system                | triclinic  |
| Space group IT number         | 2          |
| Space group name H-M alt      | P -1       |
| Space group name Hall         | -P 1       |
| Cell length a                 | 14.1352(4) |
| Cell length b                 | 15.4491(5) |
| Cell length c                 | 19.4502(6) |
| Cell angle alpha              | 85.750(2)  |
| Cell angle beta               | 69.641(2)  |
| Cell angle gamma              | 64.337(3)  |
| Cell volume                   | 3574.6(2)  |
| Cell formula units Z          | 2          |
| Refine ls R factor all        | 0.1073     |
| Refine ls R factor gt         | 0.0916     |
| Refine ls wR factor gt        | 0.2915     |
| Refine ls wR factor ref       | 0.3000     |
| Refine ls goodness of fit ref | 1.095      |

The single X-ray quality crystals of **5** were grown from pentane/EtOAc by slow evaporation at room temperature. The structure was refined by full-matrix least-squares method using SHELXL-2017/1.

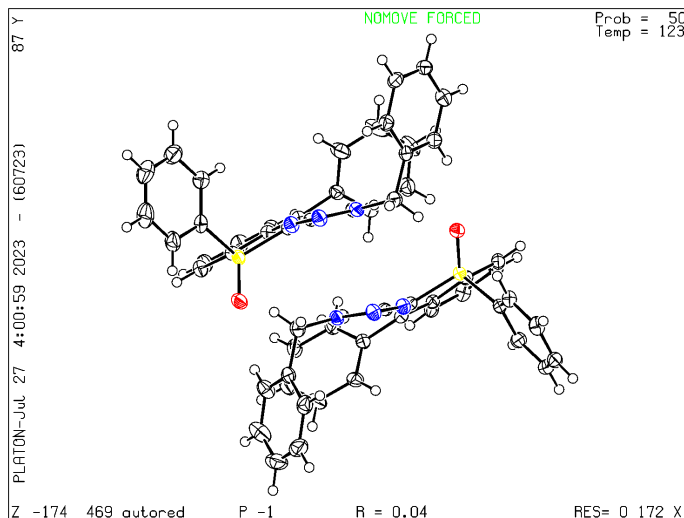

**Figure S2.** ORTEP drawing of **5** (CCDC 2285491, 50% thermal probability).

**Table S2.** Crystal data for **5**

|                               |            |
|-------------------------------|------------|
| Crystal system                | triclinic  |
| Space group IT number         | 2          |
| Space group name H-M alt      | P -1       |
| Space group name Hall         | -P 1       |
| Cell length a                 | 9.9714(2)  |
| Cell length b                 | 10.8463(2) |
| Cell length c                 | 22.5248(4) |
| Cell angle alpha              | 77.043(2)  |
| Cell angle beta               | 86.915(2)  |
| Cell angle gamma              | 82.273(2)  |
| Cell volume                   | 2351.83(8) |
| Cell formula units Z          | 2          |
| Refine ls R factor all        | 0.0464     |
| Refine ls R factor gt         | 0.0417     |
| Refine ls wR factor gt        | 0.1109     |
| Refine ls wR factor ref       | 0.1152     |
| Refine ls goodness of fit ref | 1.054      |

The single X-ray quality crystals of **7** were grown from pentane/CHCl<sub>3</sub> by slow evaporation at room temperature. The structure was refined by full-matrix least-squares method using SHELXL-2017/1.

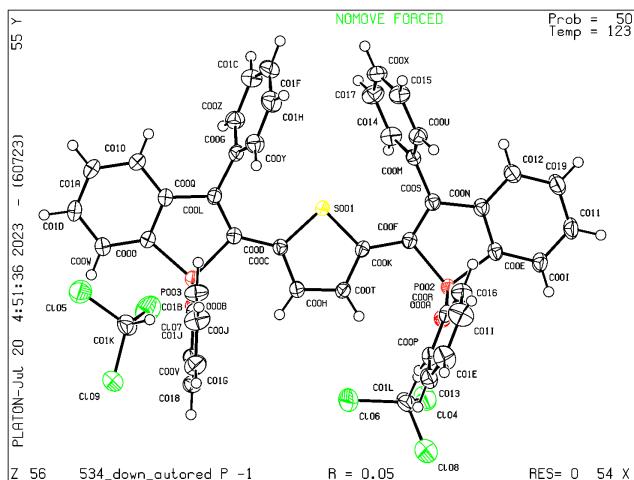

**Figure S3.** ORTEP drawing of **7** (CCDC 2283132, 50% thermal probability).

**Table S3.** Crystal data for **7**

|                               |             |
|-------------------------------|-------------|
| Crystal system                | triclinic   |
| Space group IT number         | 2           |
| Space group name H-M alt      | P -1        |
| Space group name Hall         | -P 1        |
| Cell length a                 | 14.0465(2)  |
| Cell length b                 | 14.1358(2)  |
| Cell length c                 | 14.4268(2)  |
| Cell angle alpha              | 118.189(2)  |
| Cell angle beta               | 92.5060(10) |
| Cell angle gamma              | 114.771(2)  |
| Cell volume                   | 2185.49(7)  |
| Cell formula units Z          | 2           |
| Refine ls R factor all        | 0.0496      |
| Refine ls R factor gt         | 0.0450      |
| Refine ls wR factor gt        | 0.1195      |
| Refine ls wR factor ref       | 0.1234      |
| Refine ls goodness of fit ref | 1.068       |

The single X-ray quality crystals of **8** were grown from pentane/EtOAc by slow evaporation at room temperature. The structure was refined by full-matrix least-squares method using SHELXL-2017/1.

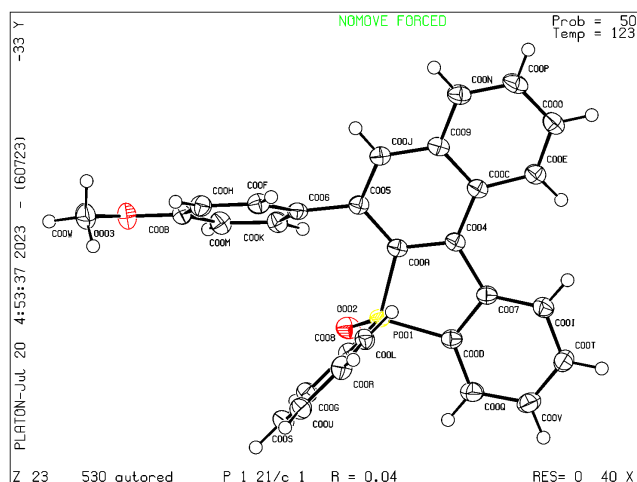

**Figure S4.** ORTEP drawing of **8** (CCDC 2283133, 50% thermal probability).

**Table S4.** Crystal data for **8**

|                               |            |
|-------------------------------|------------|
| Crystal system                | monoclinic |
| Space group IT number         | 14         |
| Space group name H-M alt      | P 1 21/c 1 |
| Space group name Hall         | -P 2ybc    |
| Cell length a                 | 9.4750(2)  |
| Cell length b                 | 18.8265(3) |
| Cell length c                 | 12.4890(2) |
| Cell angle alpha              | 90         |
| Cell angle beta               | 109.249(2) |
| Cell angle gamma              | 90         |
| Cell volume                   | 2103.25(7) |
| Cell formula units Z          | 4          |
| Refine ls R factor all        | 0.0421     |
| Refine ls R factor gt         | 0.0377     |
| Refine ls wR factor gt        | 0.1013     |
| Refine ls wR factor ref       | 0.1052     |
| Refine ls goodness of fit ref | 1.060      |

## Detailed Optimisation Studies

**Table S5.** Pd-Catalysed C2–H Alkynylation of **1a** with **2a**: Screening of Bases.<sup>[a]</sup>

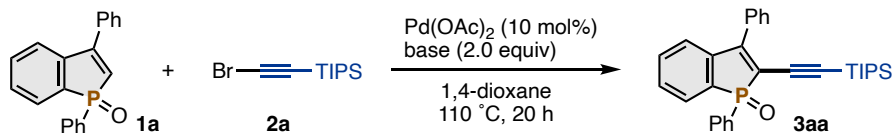

| entry | base                            | yield (%) <sup>[b]</sup> | entry    | base                            | yield (%) <sup>[b]</sup> |
|-------|---------------------------------|--------------------------|----------|---------------------------------|--------------------------|
| 1     | CsOPiv                          | 7                        | <b>9</b> | <b>NaOPiv</b>                   | <b>38</b>                |
| 2     | CsOAc                           | 2                        | 10       | NaOAc                           | 20                       |
| 3     | Cs <sub>2</sub> CO <sub>3</sub> | 2                        | 11       | Na <sub>2</sub> CO <sub>3</sub> | 11                       |
| 4     | KOPiv                           | 8                        | 12       | NaHCO <sub>3</sub>              | 0                        |
| 5     | KOAc                            | 10                       | 13       | NaTFA                           | 1                        |
| 6     | K <sub>2</sub> CO <sub>3</sub>  | 5                        | 14       | LiOAc                           | 7                        |
| 7     | KHCO <sub>3</sub>               | 9                        | 15       | Li <sub>2</sub> CO <sub>3</sub> | 0                        |
| 8     | K <sub>3</sub> PO <sub>4</sub>  | 6                        | 16       | none                            | 0                        |

[a] Reaction conditions: Pd(OAc)<sub>2</sub> (0.010 mmol), base (0.20 mmol), **1a** (0.10 mmol), **2a** (0.20 mmol), 1,4-dioxane (1.0 mL), 110 °C, 20 h, N<sub>2</sub>. [b] Estimated by <sup>31</sup>P{<sup>1</sup>H} NMR with P(O)(OEt)<sub>3</sub> as the internal standard.

**Table S6.** Pd-Catalysed C2–H Alkynylation of **1a** with **2a**: Screening of Solvents and Temperature.<sup>[a]</sup>

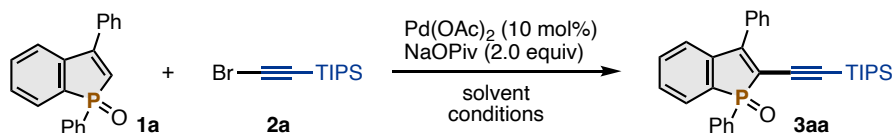

| entry    | solvent, conditions                | yield (%) <sup>[b]</sup> |
|----------|------------------------------------|--------------------------|
| 1        | 1,4-dioxane (1.0 mL), 110 °C       | 38                       |
| 2        | DMSO (1.0 mL), 110 °C              | 0                        |
| 3        | toluene (1.0 mL), 110 °C           | 41                       |
| <b>4</b> | <b>1,4-dioxane (1.0 mL), 60 °C</b> | <b>60</b>                |
| 5        | THF (1.0 mL), 60 °C                | 54                       |
| 6        | MeCN (1.0 mL), 60 °C               | 5                        |
| 7        | toluene (1.0 mL), 60 °C            | 33                       |
| 8        | CPME (1.0 mL), 60 °C               | 57                       |
| 9        | MTBE (1.0 mL), 60 °C               | 17                       |

|    |                                                        |    |
|----|--------------------------------------------------------|----|
| 10 | 2-MeTHF (1.0 mL), 60 °C                                | 41 |
| 11 | <i>i</i> -Pr <sub>2</sub> O (1.0 mL), 60 °C            | 5  |
| 12 | hexane (1.0 mL), 60 °C                                 | 4  |
| 13 | cyclohexane (1.0 mL), 60 °C                            | 15 |
| 14 | 1,4-dioxane (1.0 mL)/H <sub>2</sub> O (0.20 mL), 60 °C | 0  |
| 15 | 1,4-dioxane (1.0 mL), 80 °C                            | 52 |
| 16 | 1,4-dioxane (1.0 mL), 40 °C                            | 28 |
| 17 | 1,4-dioxane (1.0 mL), rt                               | 7  |

[a] Reaction conditions: Pd(OAc)<sub>2</sub> (0.010 mmol), NaOPiv (0.20 mmol), **1a** (0.10 mmol), **2a** (0.20 mmol), solvent, 20 h, N<sub>2</sub>. [b] Estimated by <sup>31</sup>P{<sup>1</sup>H} NMR with P(O)(OEt)<sub>3</sub> as the internal standard.

**Table S7.** Pd-Catalysed C2–H Alkynylation of **1a** with **2a**: Screening of Pd sources and additives.<sup>[a]</sup>

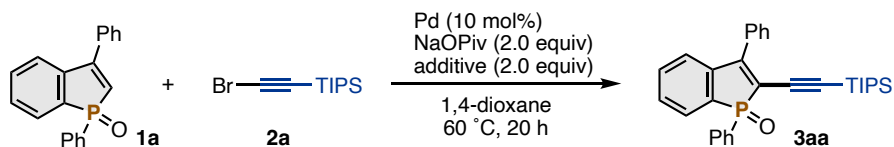

| entry | Pd                                 | additive    | yield (%) <sup>[b]</sup> |
|-------|------------------------------------|-------------|--------------------------|
| 1     | Pd(OAc) <sub>2</sub>               | none        | 60                       |
| 2     | Pd(OAc) <sub>2</sub>               | AcOH        | 5                        |
| 3     | Pd(OAc) <sub>2</sub>               | AgTFA       | 0                        |
| 4     | <b>Pd(OPiv)<sub>2</sub></b>        | <b>none</b> | <b>73</b>                |
| 5     | Pd(TFA) <sub>2</sub>               | none        | 65                       |
| 6     | PdCl <sub>2</sub>                  | none        | 64                       |
| 7     | Pd <sub>2</sub> (dba) <sub>3</sub> | none        | 64                       |

[a] Reaction conditions: Pd (0.010 mmol), NaOPiv (0.20 mmol), **1a** (0.10 mmol), **2a** (0.20 mmol), 1,4-dioxane (1.0 mL), 60 °C, 20 h, N<sub>2</sub>. [b] Estimated by <sup>31</sup>P{<sup>1</sup>H} NMR with P(O)(OEt)<sub>3</sub> as the internal standard.

**Table S8.** Pd-Catalysed C2–H Alkynylation of **1a** with **2a**: Concentration Effect.<sup>[a]</sup>

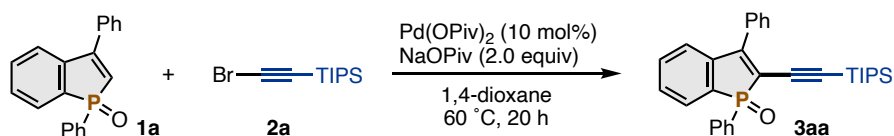

| entry | solvent amount (mL) | yield (%) <sup>[b]</sup> | entry            | solvent amount (mL) | yield (%) <sup>[b]</sup> |
|-------|---------------------|--------------------------|------------------|---------------------|--------------------------|
| 1     | 1.0                 | 73                       | 4 <sup>[c]</sup> | 1.5                 | 84 (72)                  |



|   |     |    |                    |     |                   |
|---|-----|----|--------------------|-----|-------------------|
| 2 | 0.5 | 6  | 5 <sup>[c,d]</sup> | 1.5 | 40 <sup>[e]</sup> |
| 3 | 1.5 | 68 |                    |     |                   |

[a] Reaction conditions: Pd(OPiv)<sub>2</sub> (0.010 mmol), NaOPiv (0.20 mmol), **1a** (0.10 mmol), **2a** (0.20 mmol), 1,4-dioxane, 60 °C, 20 h, N<sub>2</sub>. [b] Estimated by <sup>31</sup>P{<sup>1</sup>H} NMR with P(O)(OEt)<sub>3</sub> as the internal standard. Isolated yield is in parentheses. [c] For 48 h. [d] With 5 mol% Pd(OPiv)<sub>2</sub> (0.0050 mmol). [e] The unreacted **1a** was recovered in 44% yield.

**Scheme S1.** Effect of Phosphorus Moiety.

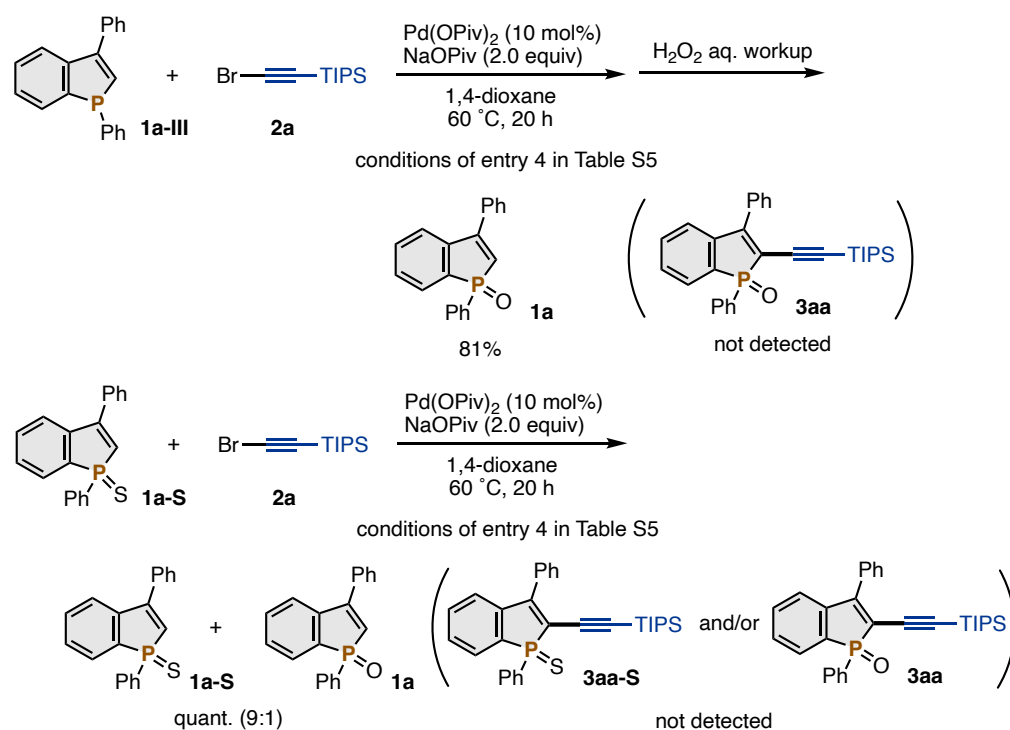

**Scheme S2.** Effect of Alkynyl Sources.

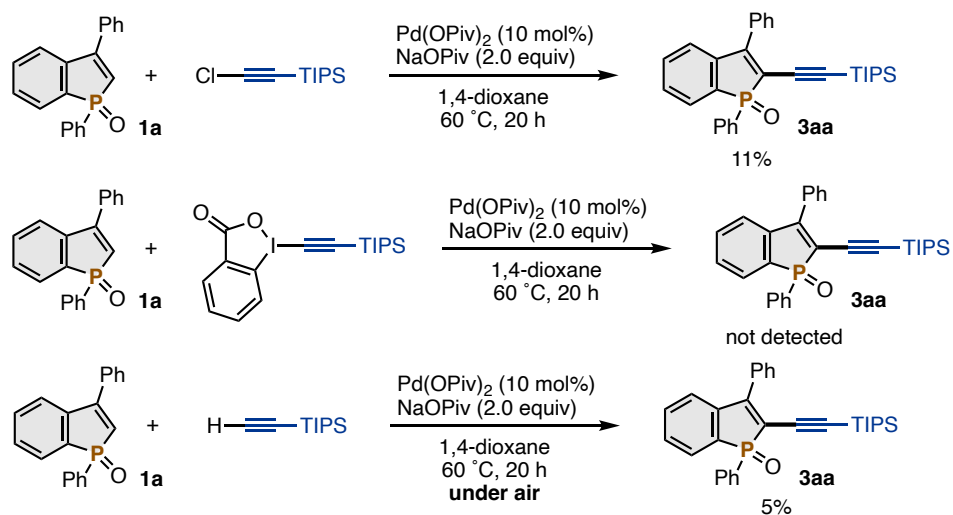

**Scheme S3.** Other Attempts.

a) attempt to apply asymmetric catalysis

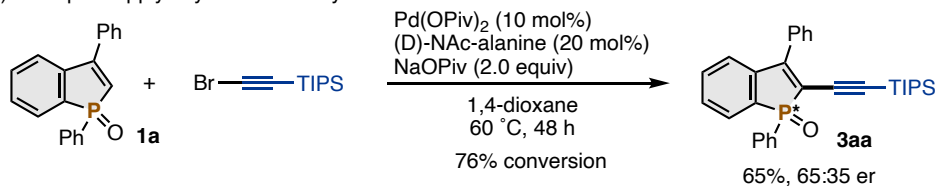

b) attempt to apply double C-H alkylation

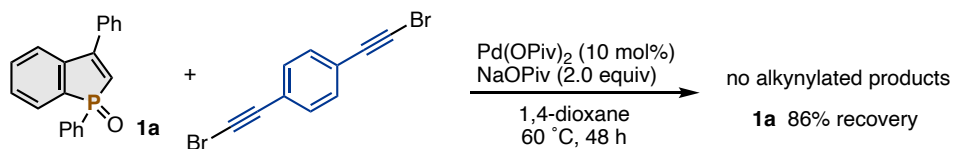

c) attempt to apply C2,C3-free benzophosphole

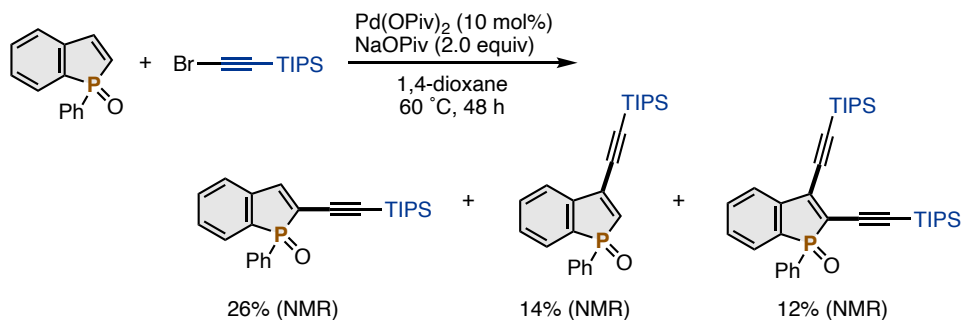

### Chiral HPLC Charts

**3aa**: The enantiomeric ratio was determined by HPLC analysis in comparison with authentic racemic material (CHIRALPAK AS-H column, 95/5 hexane/isopropyl alcohol, 0.5 mL/min,  $t_R = 15.0, 26.1$  min, UV detection at 258 nm, 30 °C).

**3aa** synthesized under nonenantioselective conditions

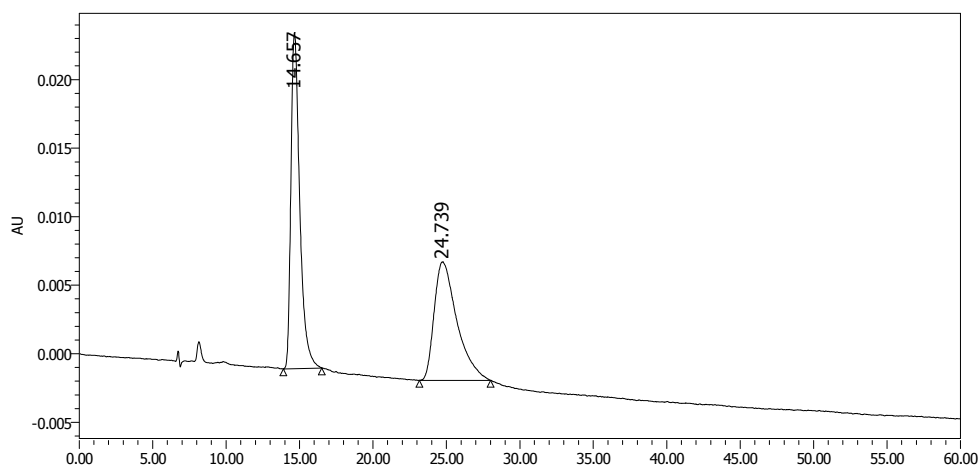

| Peak # | Ret. Time | Area    | Area % |
|--------|-----------|---------|--------|
| 1      | 14.657    | 1026332 | 52.37  |
| 2      | 24.739    | 933579  | 47.63  |

**3aa** synthesized under enantioselective conditions using (D)-*N*-Ac-alanine

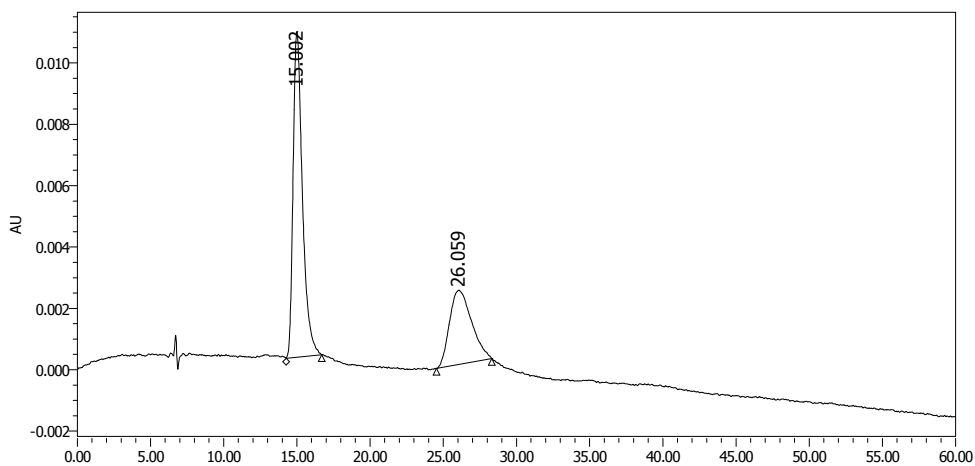

| Peak # | Ret. Time | Area   | Area % |
|--------|-----------|--------|--------|
| 1      | 15.002    | 470011 | 65.01  |
| 2      | 26.059    | 252973 | 34.99  |

## Control Experiments

*Scheme S4.* Stoichiometric Reaction with Isolated Pd(II)-Alkynyl Complex.<sup>S3</sup>

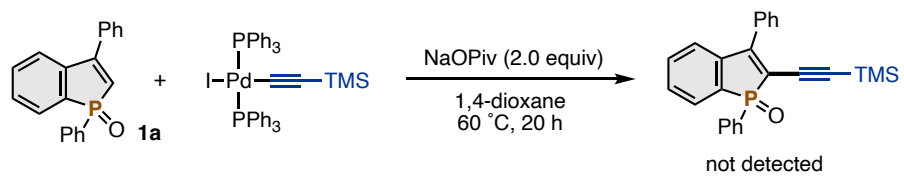

## Plausible Reaction Mechanism

**Scheme S5.** Plausible Catalytic Cycle.

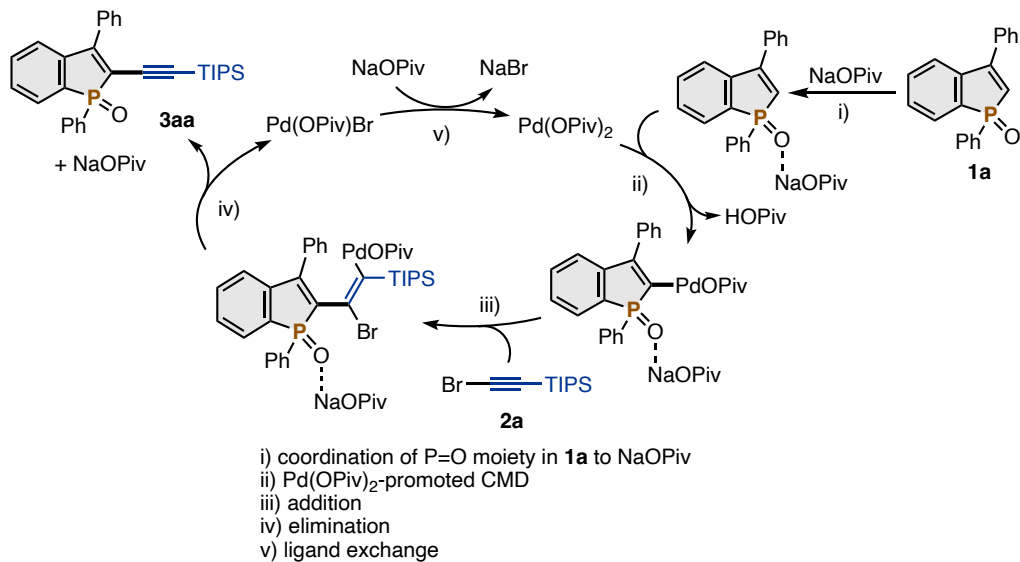

Notably, a trans elimination process similar to the step iv) was proposed in the Rh-catalyzed C-H alkylation reaction with the alkynyl bromide, where the effective abstraction with the Ag cation was observed in the calculated transition state.<sup>S4</sup> Thus, the related abstraction with Na cation might be involved also in the present Pd-catalyzed reaction.

In addition, we also investigated the effect of additional NaBr under otherwise identical conditions (see below). However, the almost same result was obtained (86% NMR yield w/ NaBr vs 84% NMR yield w/o NaBr), thus suggesting the negligible role of NaBr in the catalytic reaction.

**Scheme S6.** Effects of NaBr.

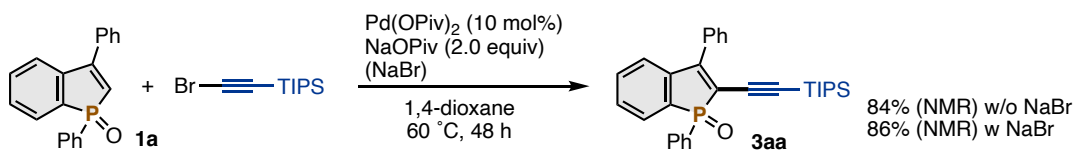

## Photoluminescence Properties

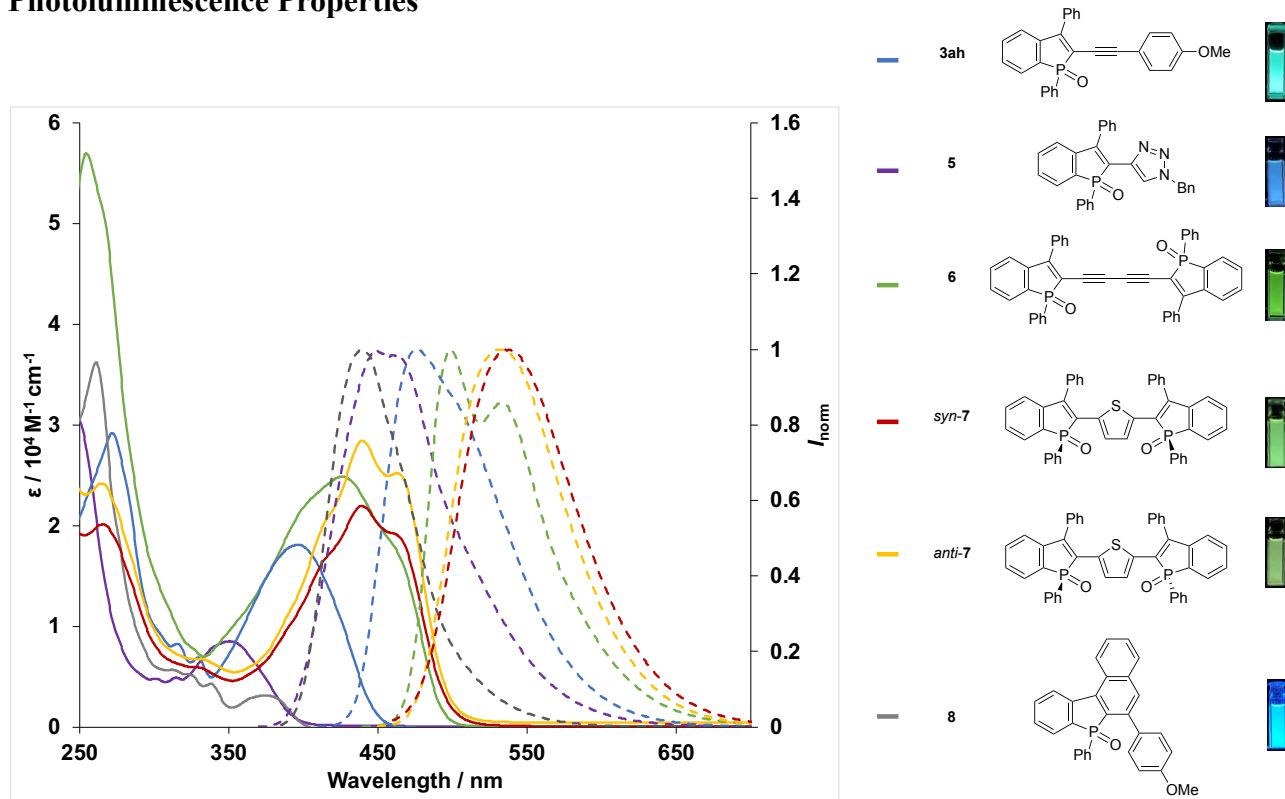

**Figure S1.** UV-vis absorption spectra (solid line), emission (dotted line) spectra, and fluorescence images of **3ah**, **5**, **6**, *syn-7*, *anti-7*, and **8** ( $1.0 \times 10^{-5}$  M in  $\text{CHCl}_3$ ). Excited at the absorption maxima for the emission spectrum.

**Table S10.** Photoluminescence properties of selected compounds in  $\text{CHCl}_3$  ( $1.0 \times 10^{-5}$  M).

| compd         | $\lambda_{\text{abs}}$ (nm) ( $\epsilon$ ( $10^4 \text{ M}^{-1} \text{ cm}^{-1}$ )) | $\lambda_{\text{em}}^a$ (nm) | $\Phi_{\text{F}}^b$ | $\Delta\nu$ ( $\text{cm}^{-1}$ ) <sup>c</sup> |
|---------------|-------------------------------------------------------------------------------------|------------------------------|---------------------|-----------------------------------------------|
| <b>3ah</b>    | 273 (2.91), 396 (1.81)                                                              | 475                          | 0.74                | 4200                                          |
| <b>5</b>      | 350 (0.85)                                                                          | 450, 461                     | 0.15                | 6349                                          |
| <b>6</b>      | 256 (5.67), 426 (2.49)                                                              | 500, 534                     | 0.11                | 3474                                          |
| <i>syn-7</i>  | 266 (2.01), 440 (2.20), 463 (1.91)                                                  | 537                          | 0.16                | 2976                                          |
| <i>anti-7</i> | 265 (2.41), 440 (2.84), 465 (2.51)                                                  | 532                          | 0.19                | 2708                                          |
| <b>8</b>      | 262 (3.60), 373 (0.31)                                                              | 439                          | 0.51                | 4031                                          |

<sup>a</sup> Excited at 396 nm (**3ah**), 350 nm (**5**), 426 nm (**6**), 463 nm (*syn-7*), 465 nm (*anti-7*), and 373 nm (**8**).

<sup>b</sup> Absolute fluorescence quantum yields. <sup>c</sup> Stokes shifts.

## Cyclic Voltammetry and Differential Pulse Voltammetry

The IUPAC convention was used to report the CV and DPV data. The CV and DPV of the indicated compounds were recorded in MeCN (0.01 M, degassed by N<sub>2</sub> gas bubbling) containing 0.1 M n-Bu<sub>4</sub>NPF<sub>6</sub> with a Pt working electrode, a Pt counter electrode, and a Ag/Ag<sup>+</sup> reference electrode. The measurements were performed at room temperature.

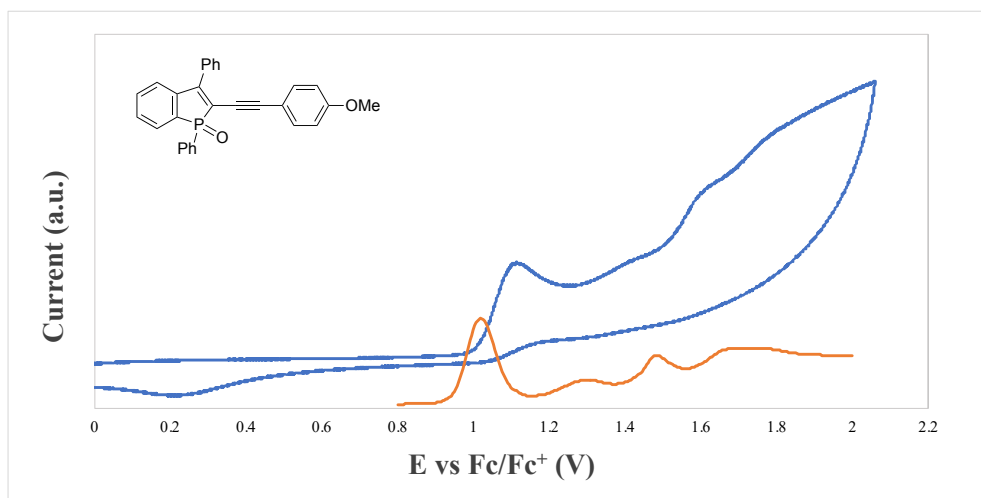

**Figure S2.** Cyclic voltammograms (blue line, from 0 V to 2.0 V then back to 0 V) and differential pulse voltammograms (orange line) of **3ah** in MeCN containing 0.1 M n-Bu<sub>4</sub>NPF<sub>6</sub> at a scan rate of 0.10 V/s.

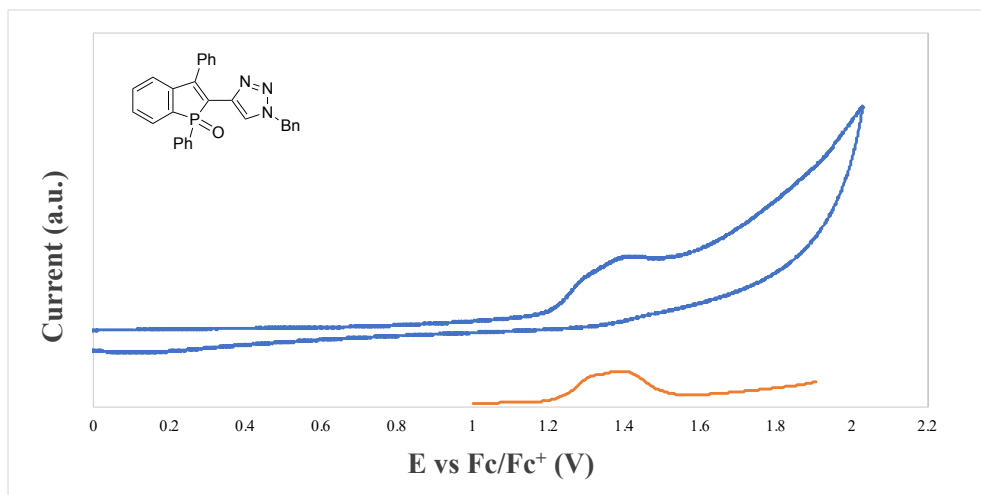

**Figure S3.** Cyclic voltammograms (blue line, from 0 V to 2.0 V then back to 0 V) and differential pulse voltammograms (orange line) of **5** in MeCN containing 0.1 M n-Bu<sub>4</sub>NPF<sub>6</sub> at a scan rate of 0.10 V/s.

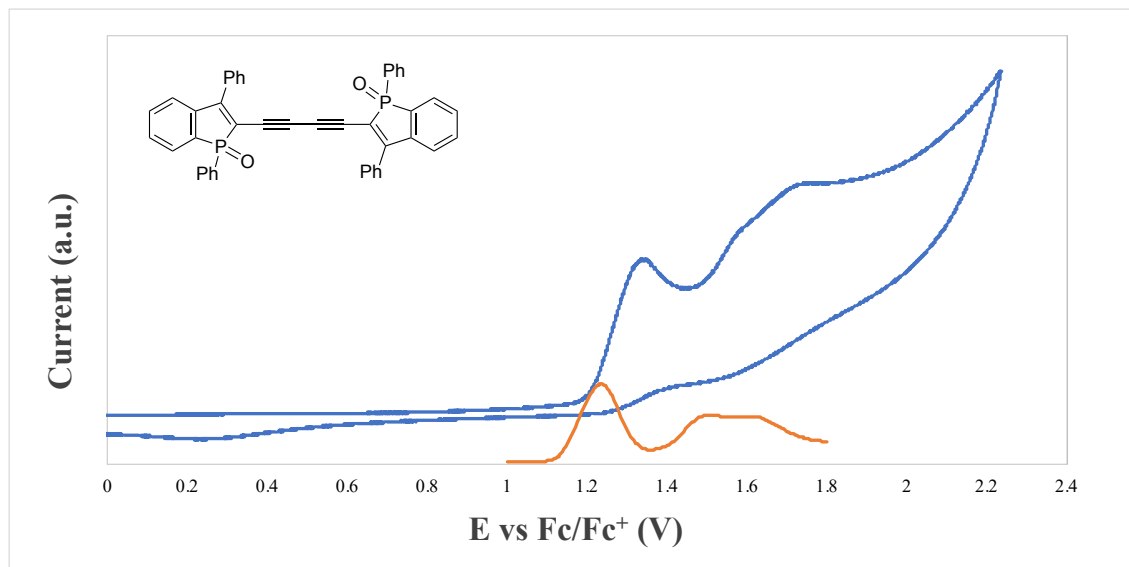

**Figure S4.** Cyclic voltammograms (blue line, from 0 V to 2.2 V then back to 0 V) and differential pulse voltammograms (orange line) of **6** in MeCN containing 0.1 M n-Bu<sub>4</sub>NPF<sub>6</sub> at a scan rate of 0.10 V/s.

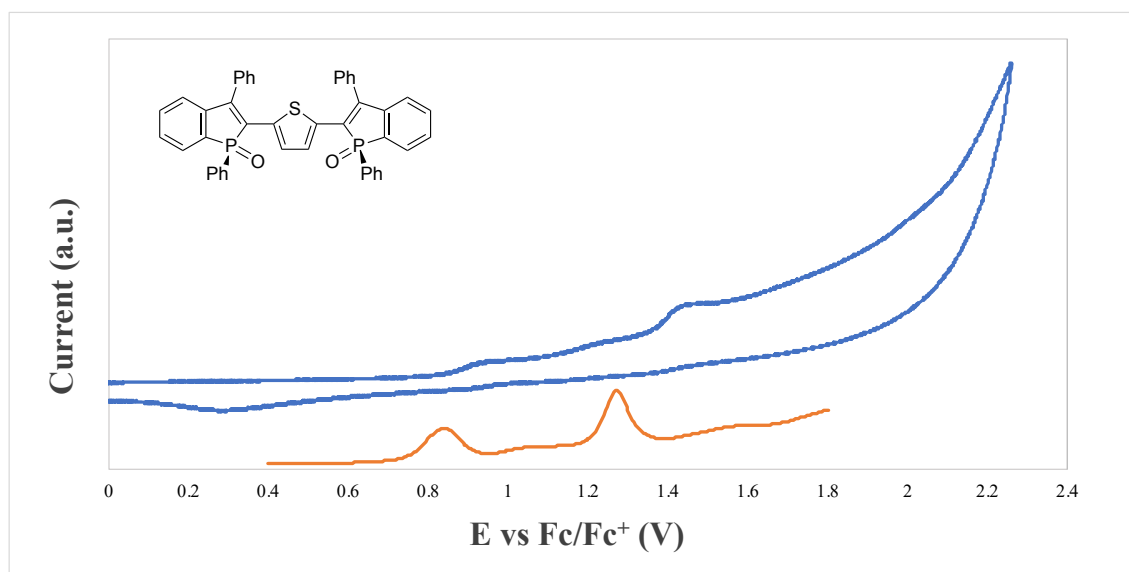

**Figure S5.** Cyclic voltammograms (blue line, from 0 V to 2.2 V then back to 0 V) and differential pulse voltammograms (orange line) of **syn-7** in MeCN containing 0.1 M n-Bu<sub>4</sub>NPF<sub>6</sub> at a scan rate of 0.10 V/s.



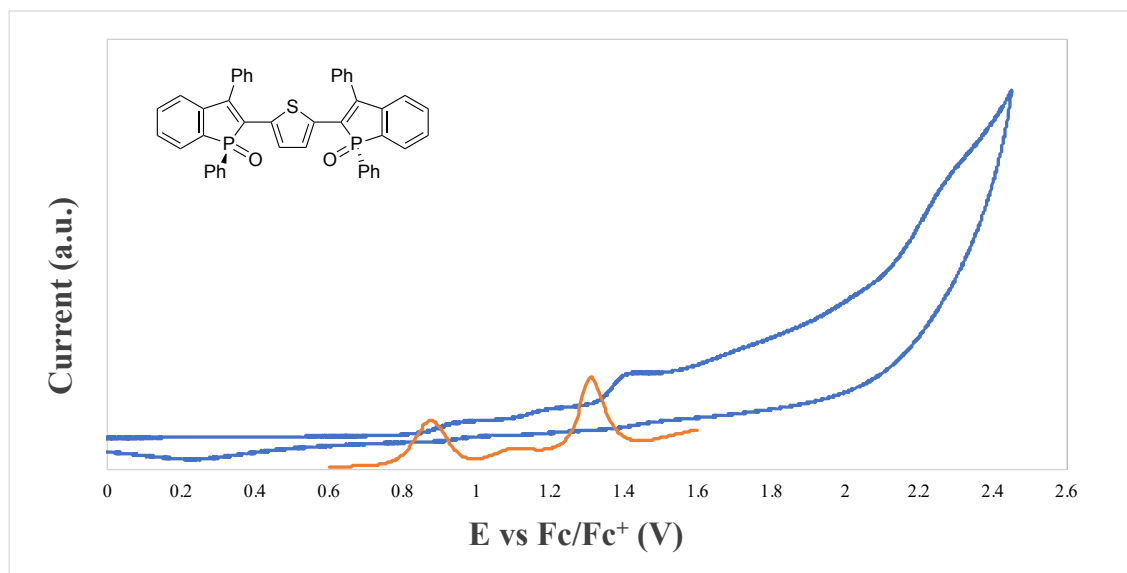

**Figure S6.** Cyclic voltammograms (blue line, from 0 V to 2.4 V then back to 0 V) and differential pulse voltammograms (orange line) of *anti-7* in MeCN containing 0.1 M n-Bu<sub>4</sub>NPF<sub>6</sub> at a scan rate of 0.10 V/s.

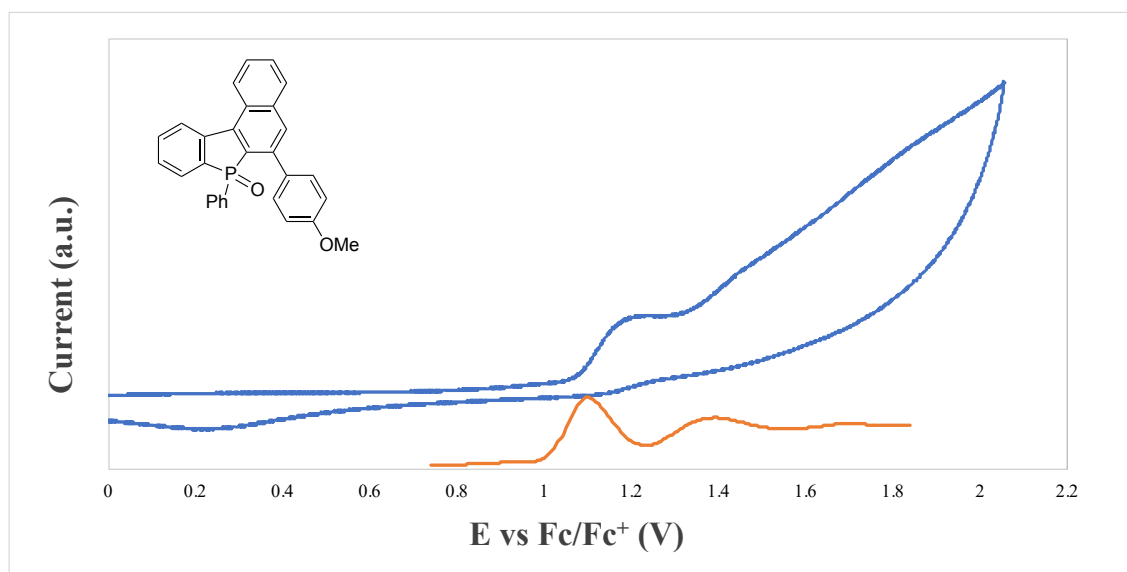

**Figure S7.** Cyclic voltammograms (blue line, from 0 V to 2.0 V then back to 0 V) and differential pulse voltammograms (orange line) of **8** in MeCN containing 0.1 M n-Bu<sub>4</sub>NPF<sub>6</sub> at a scan rate of 0.10 V/s.

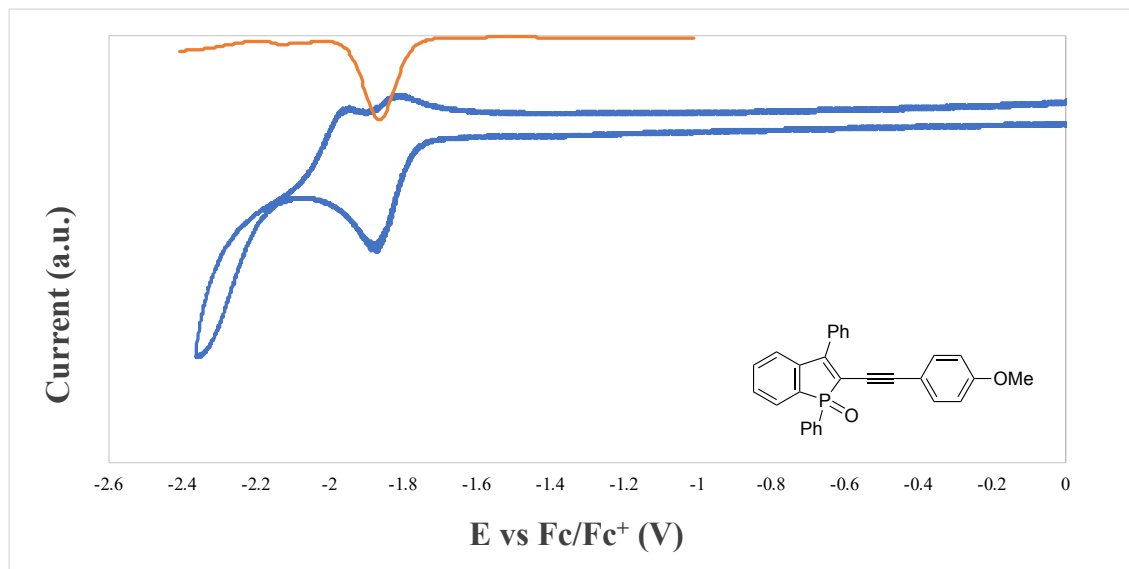

**Figure S8.** Cyclic voltammograms (blue line, from 0 V to  $-2.4$  V then back to 0 V) and differential pulse voltammograms (orange line) of **3ah** in MeCN containing 0.1 M  $n\text{-Bu}_4\text{NPF}_6$  at a scan rate of 0.10 V/s.

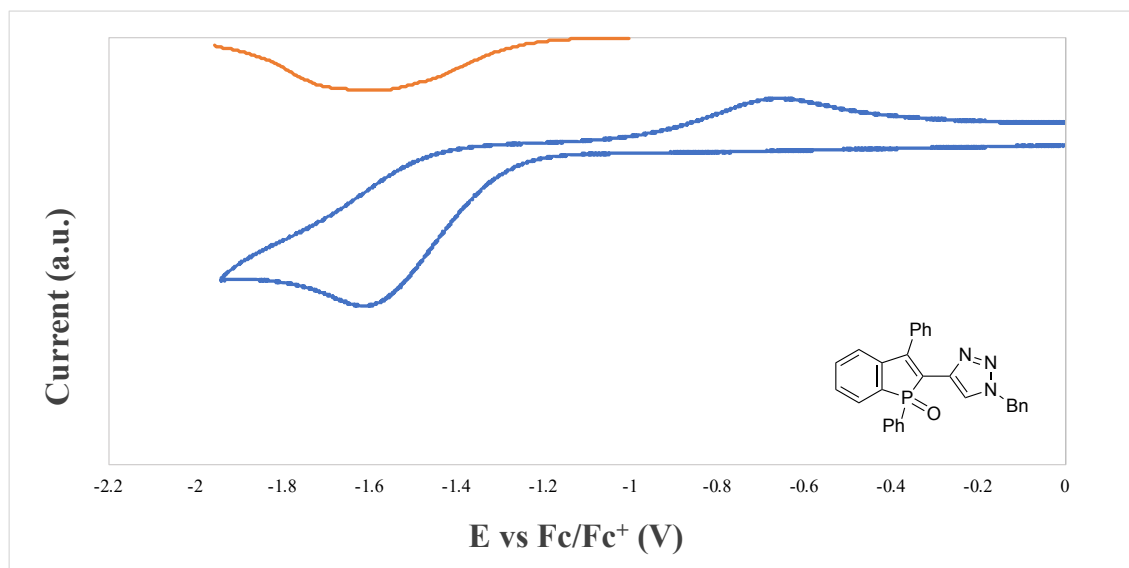

**Figure S9.** Cyclic voltammograms (blue line, from 0 V to  $-2.0$  V then back to 0 V) and differential pulse voltammograms (orange line) of **5** in MeCN containing 0.1 M  $n\text{-Bu}_4\text{NPF}_6$  at a scan rate of 0.10 V/s.

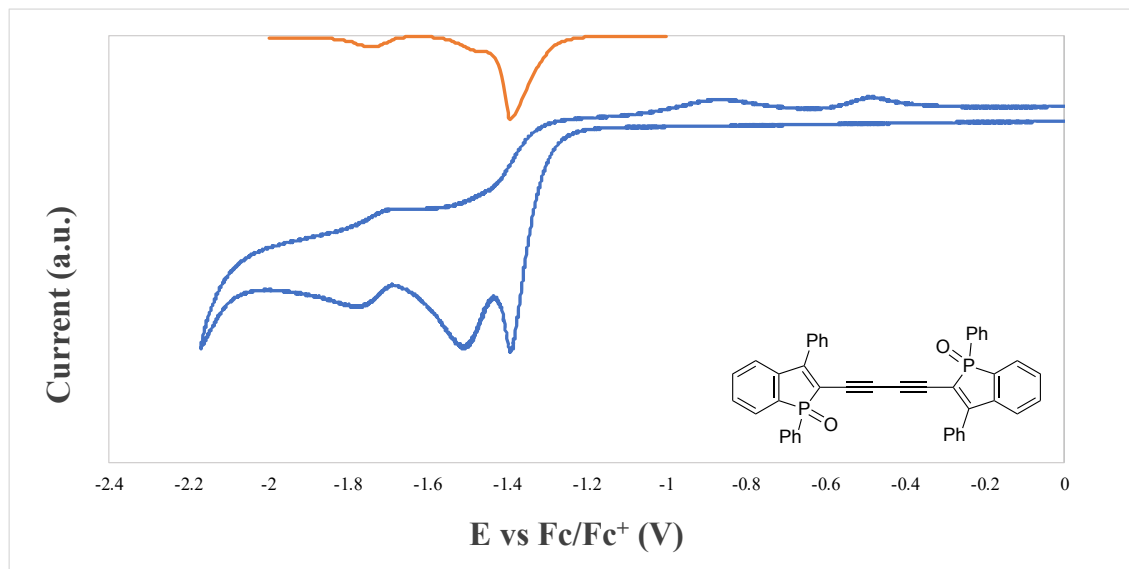

**Figure S10.** Cyclic voltammograms (blue line, from 0 V to  $-2.2$  V then back to 0 V) and differential pulse voltammograms (orange line) of **6** in MeCN containing 0.1 M  $n\text{-Bu}_4\text{NPF}_6$  at a scan rate of 0.10 V/s.

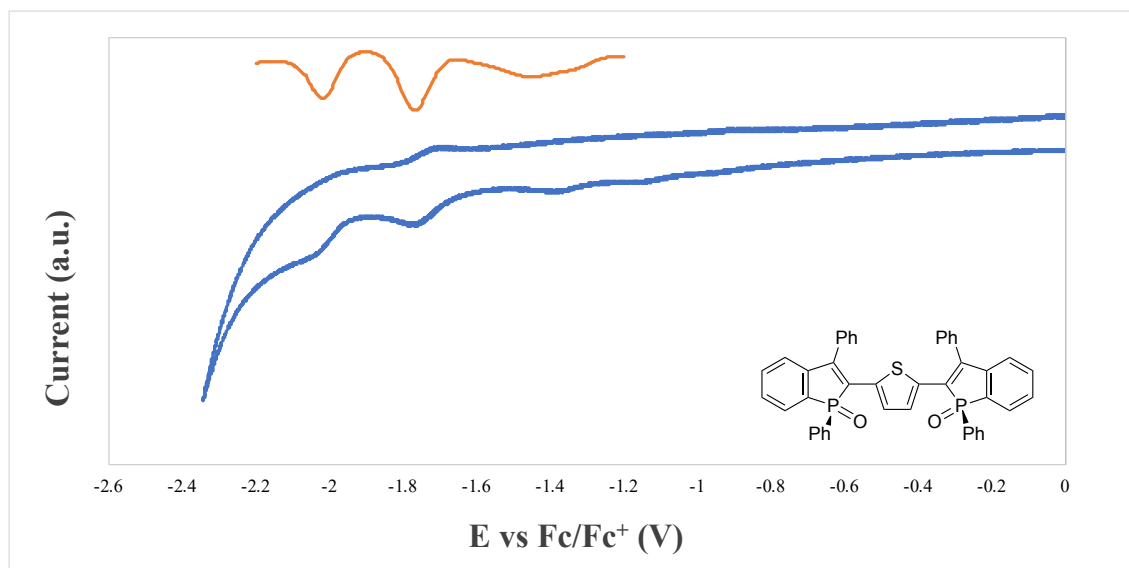

**Figure S11.** Cyclic voltammograms (blue line, from 0 V to  $-2.4$  V then back to 0 V) and differential pulse voltammograms (orange line) of **syn-7** in MeCN containing 0.1 M  $n\text{-Bu}_4\text{NPF}_6$  at a scan rate of 0.10 V/s.

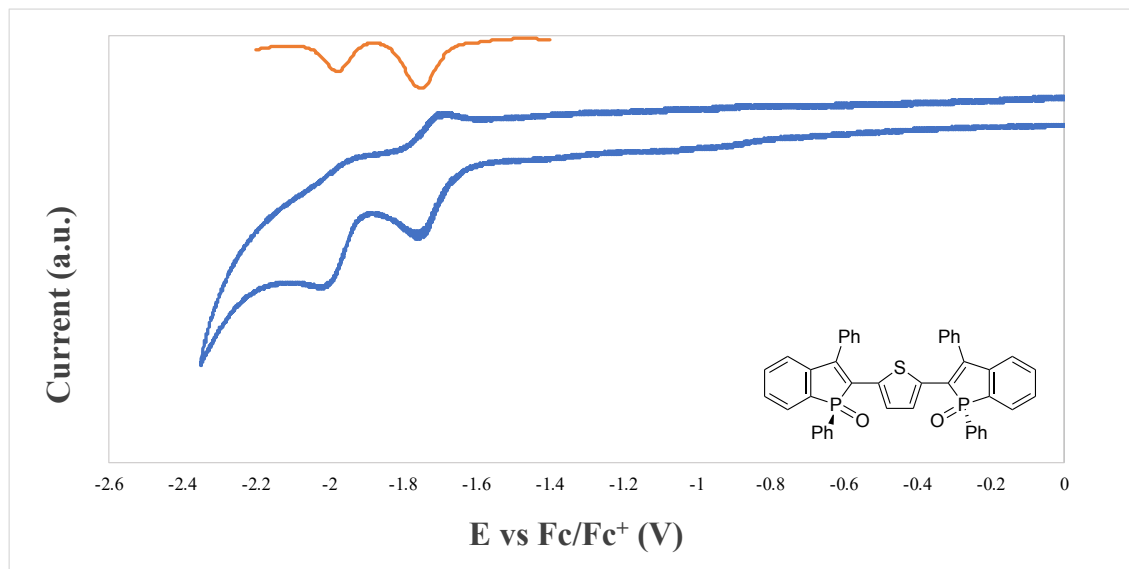

**Figure S12.** Cyclic voltammograms (blue line, from 0 V to -2.4 V then back to 0 V) and differential pulse voltammograms (orange line) of **anti-7** in MeCN containing 0.1 M  $n\text{-Bu}_4\text{NPF}_6$  at a scan rate of 0.10 V/s.

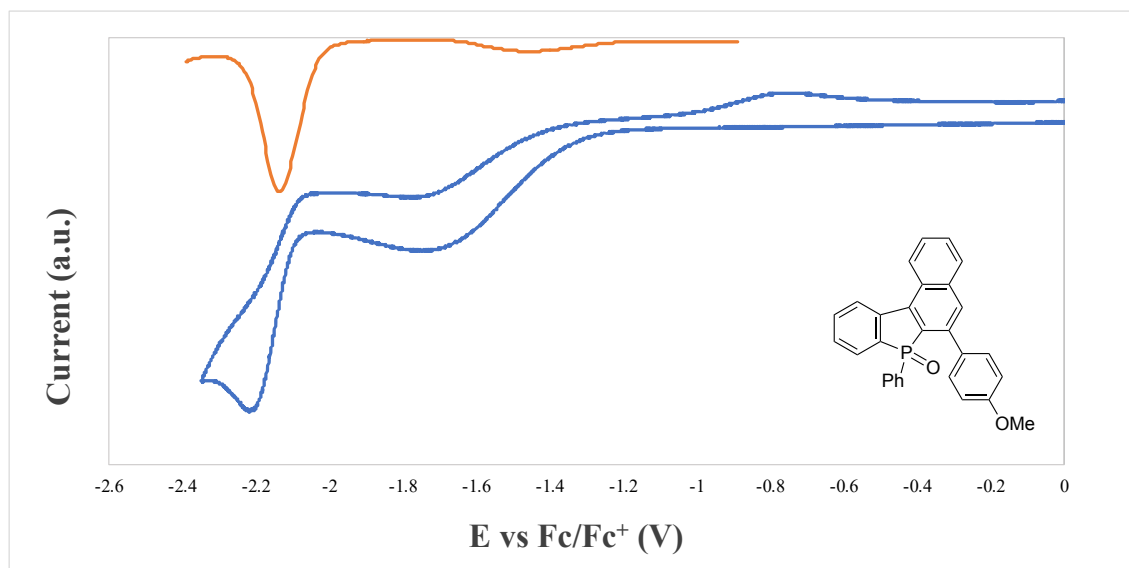

**Figure S13.** Cyclic voltammograms (blue line, from 0 V to -2.4 V then back to 0 V) and differential pulse voltammograms (orange line) of **8** in MeCN containing 0.1 M  $n\text{-Bu}_4\text{NPF}_6$  at a scan rate of 0.10 V/s.

**Table S11.** Absorption wavelengths, HOMO-LUMO energy gaps, and cyclic (differential pulse) voltammogram data of selected compounds.

| compd         | $\lambda_{\text{onset}}^{\text{abs}}$<br>(nm) <sup>a</sup> | $E_{\text{g}}^{\text{opt}}$<br>(eV) <sup>b</sup> | $E_{\text{ox}}$<br>(V) <sup>c</sup> | $E_{\text{HOMO}}$<br>(eV) <sup>d</sup> | $E_{\text{red}}$<br>(V) <sup>c</sup> | $E_{\text{LUMO}}$<br>(eV) <sup>d</sup> | $E_{\text{LUMO}}$<br>(eV) <sup>e</sup> |
|---------------|------------------------------------------------------------|--------------------------------------------------|-------------------------------------|----------------------------------------|--------------------------------------|----------------------------------------|----------------------------------------|
| <b>3ah</b>    | 448                                                        | 2.77                                             | 1.02                                | -5.82                                  | -1.86                                | -2.94                                  | -3.05                                  |
| <b>5</b>      | 400                                                        | 3.10                                             | 1.41                                | -6.21                                  | -1.60                                | -3.21                                  | -3.11                                  |
| <b>6</b>      | 524                                                        | 2.37                                             | 1.24                                | -6.04                                  | -1.39                                | -3.41                                  | -3.67                                  |
| <i>syn-7</i>  | 496                                                        | 2.50                                             | 0.84                                | -5.64                                  | -1.77                                | -3.03                                  | -3.14                                  |
| <i>anti-7</i> | 496                                                        | 2.50                                             | 0.88                                | -5.68                                  | -1.76                                | -3.04                                  | -3.18                                  |
| <b>8</b>      | 395                                                        | 3.14                                             | 1.10                                | -5.90                                  | -2.14                                | -2.66                                  | -2.76                                  |

<sup>a</sup> Measured in CH<sub>3</sub>Cl. <sup>b</sup> Determined from the onset of the absorption spectra. <sup>c</sup> Performed in MeCN in the presence of Bu<sub>4</sub>NPF<sub>6</sub>.  $\nu = 0.10$  V/s. Values determined by DPV, versus Fc/Fc<sup>+</sup>. <sup>d</sup> The approximation for Fc/Fc<sup>+</sup> level is -4.8 eV versus vacuum:  $E_{\text{HOMO}} = -4.8 - E_{\text{ox}}$ .  $E_{\text{LUMO}} = -4.8 - E_{\text{red}}$ . <sup>e</sup> Estimated from  $E_{\text{HOMO}}$  and  $E_{\text{g}}^{\text{opt}}$ .  $E_{\text{LUMO}} = E_{\text{HOMO}} + E_{\text{g}}^{\text{opt}}$ .

## Robustness Screen

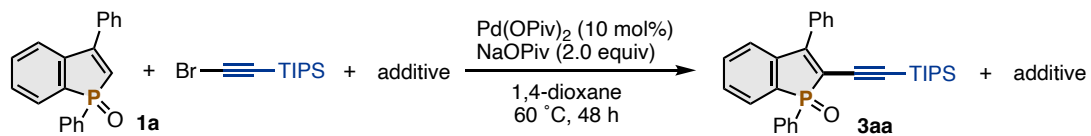

| entry | additive | yield of <b>3aa</b> (%) | yield of recovered <b>1a</b> (%) | yield of recovered additive (%) |
|-------|----------|-------------------------|----------------------------------|---------------------------------|
| 1     |          | 88 ✓                    | 12                               | 72 ✓                            |
| 2     |          | 86 ✓                    | 0                                | 74 ✓                            |
| 3     |          | 26 ✗                    | 31                               | 0 ✗                             |
| 4     |          | 0 ✗                     | quant.                           | quant. ✓                        |
| 5     |          | 46 -                    | 49                               | 32 ✗                            |
| 6     |          | 0 ✗                     | quant.                           | quant. ✓                        |

Reaction conditions:  $\text{Pd(OPiv)}_2$  (0.010 mmol),  $\text{NaOPiv}$  (0.20 mmol), **1a** (0.10 mmol), **2a** (0.20 mmol), additive (0.010 mmol), 1,4-dioxane (1.5 mL), 60 °C, 48 h,  $\text{N}_2$ . Yields were estimated by  $^{31}\text{P}\{^1\text{H}\}$  and/or  $^1\text{H}$  NMR with  $\text{P(O)(OEt)}_3$  as the internal standard.

# Copies of NMR Spectra

## [<sup>1</sup>H, <sup>13</sup>C{<sup>1</sup>H}, and <sup>31</sup>P{<sup>1</sup>H} NMR Spectra of **3aa**]

<sup>1</sup>H NMR  
(400 MHz, CDCl<sub>3</sub>)

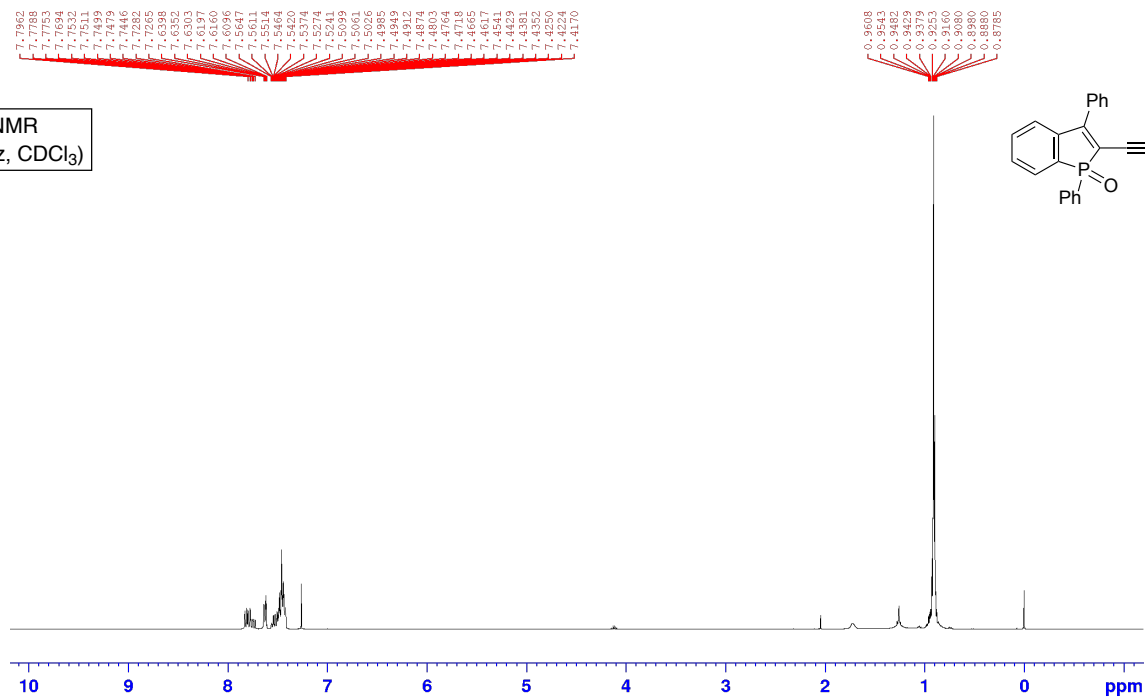

<sup>13</sup>C{<sup>1</sup>H} NMR  
(100 MHz, CDCl<sub>3</sub>)

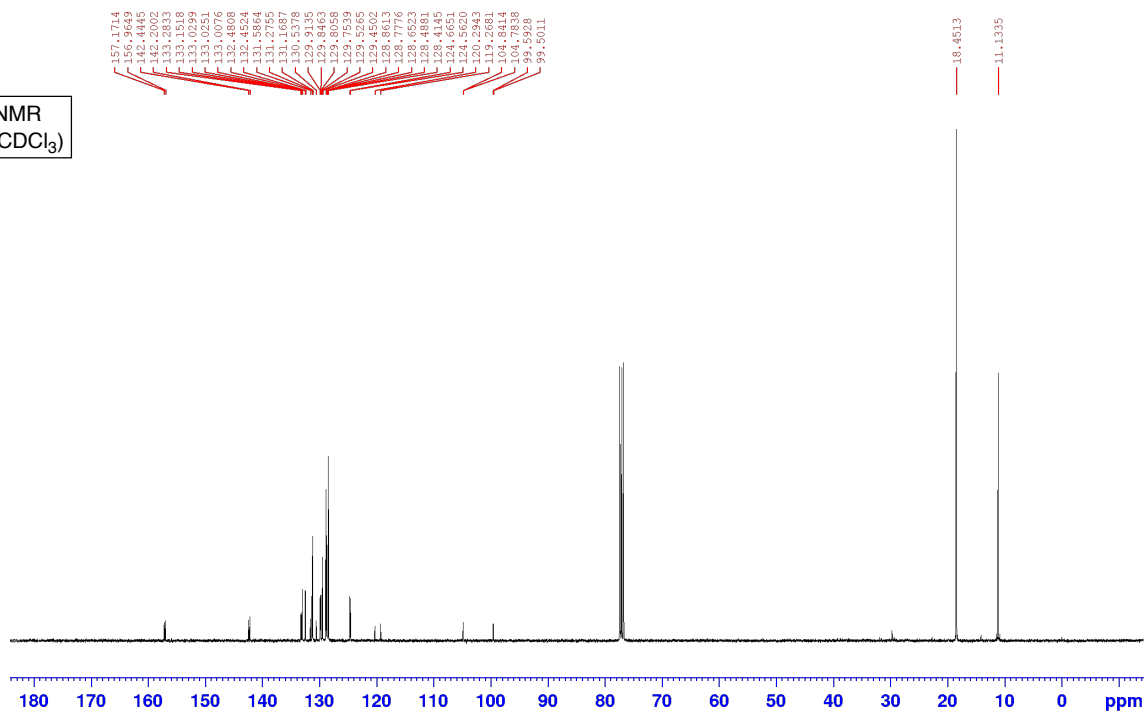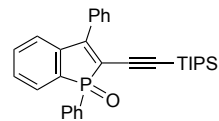

$^{31}\text{P}\{^1\text{H}\}$  NMR  
(162 MHz,  $\text{CDCl}_3$ )

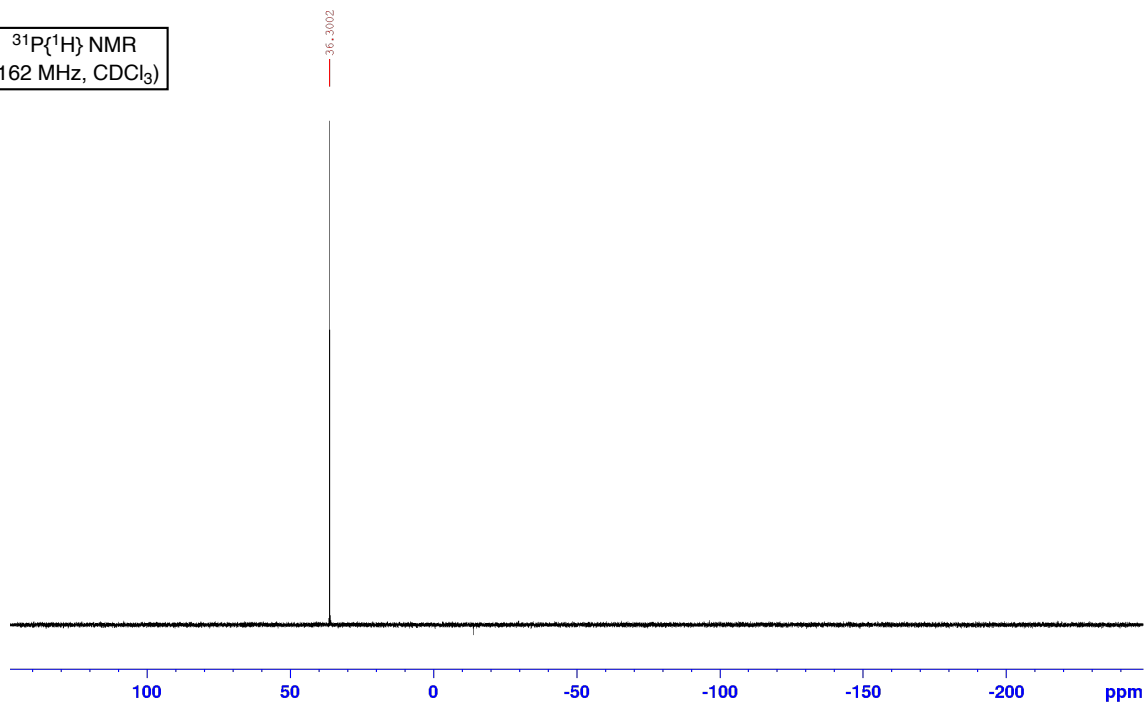



$^1\text{H}$ ,  $^{13}\text{C}\{^1\text{H}\}$ , and  $^{31}\text{P}\{^1\text{H}\}$  NMR Spectra of **3ba**

$^1\text{H}$  NMR  
(400 MHz,  $\text{CDCl}_3$ )

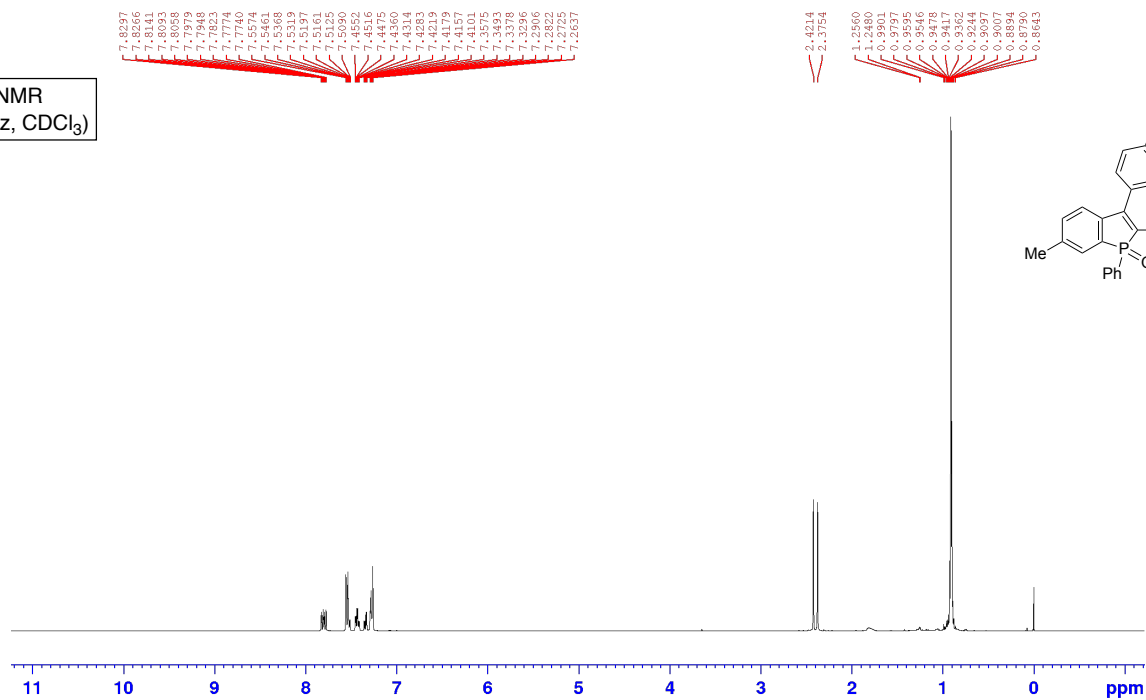

$^{13}\text{C}\{^1\text{H}\}$  NMR  
(100 MHz,  $\text{CDCl}_3$ )

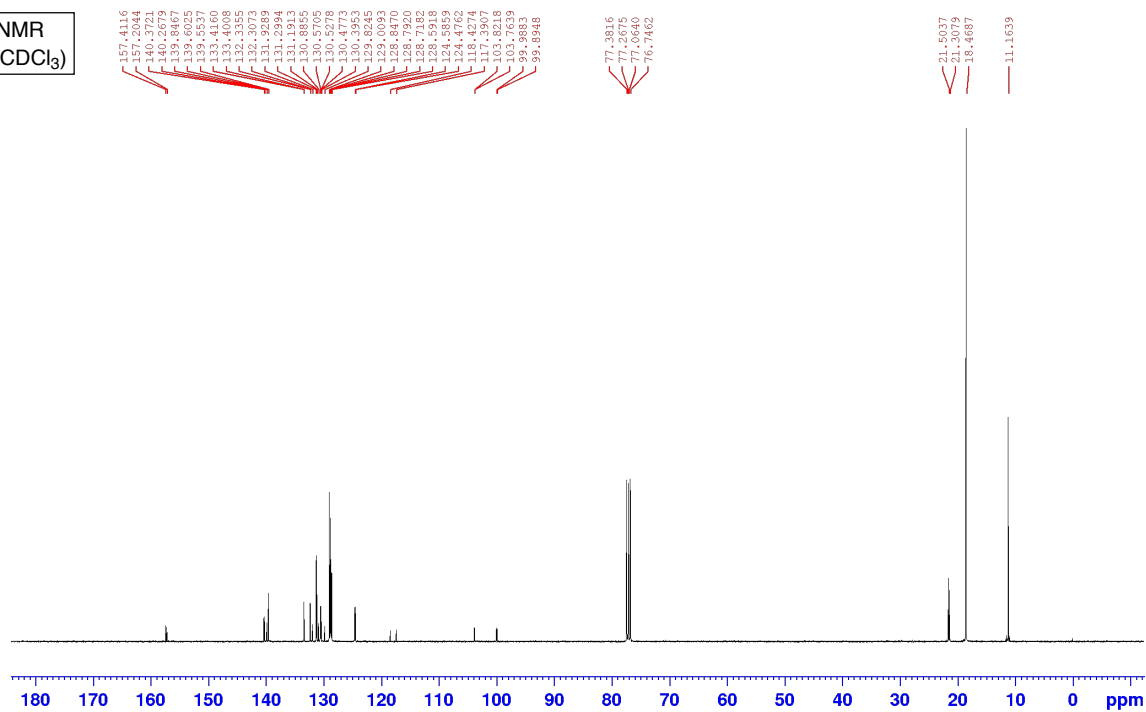

$^{31}\text{P}\{^1\text{H}\}$  NMR  
(162 MHz,  $\text{CDCl}_3$ )

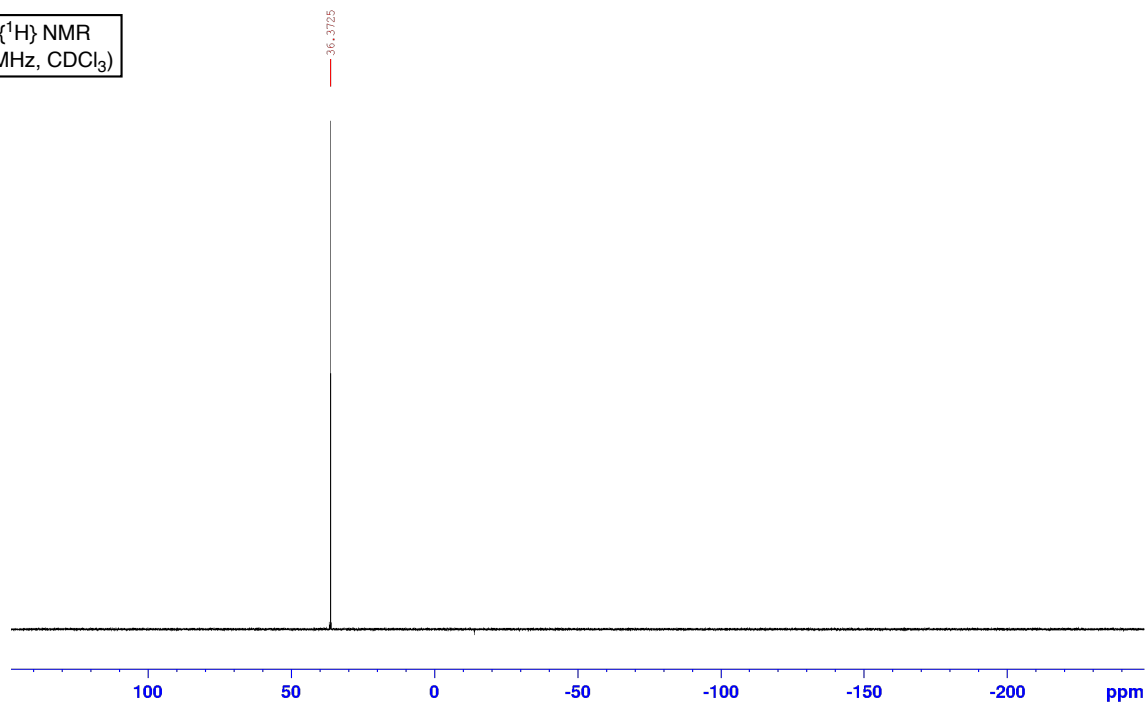

$[^1\text{H}, ^{13}\text{C}\{^1\text{H}\}, \text{ and } ^{31}\text{P}\{^1\text{H}\}] \text{ NMR Spectra of } \mathbf{3ca}$

$^1\text{H}$  NMR  
(400 MHz,  $\text{CDCl}_3$ )

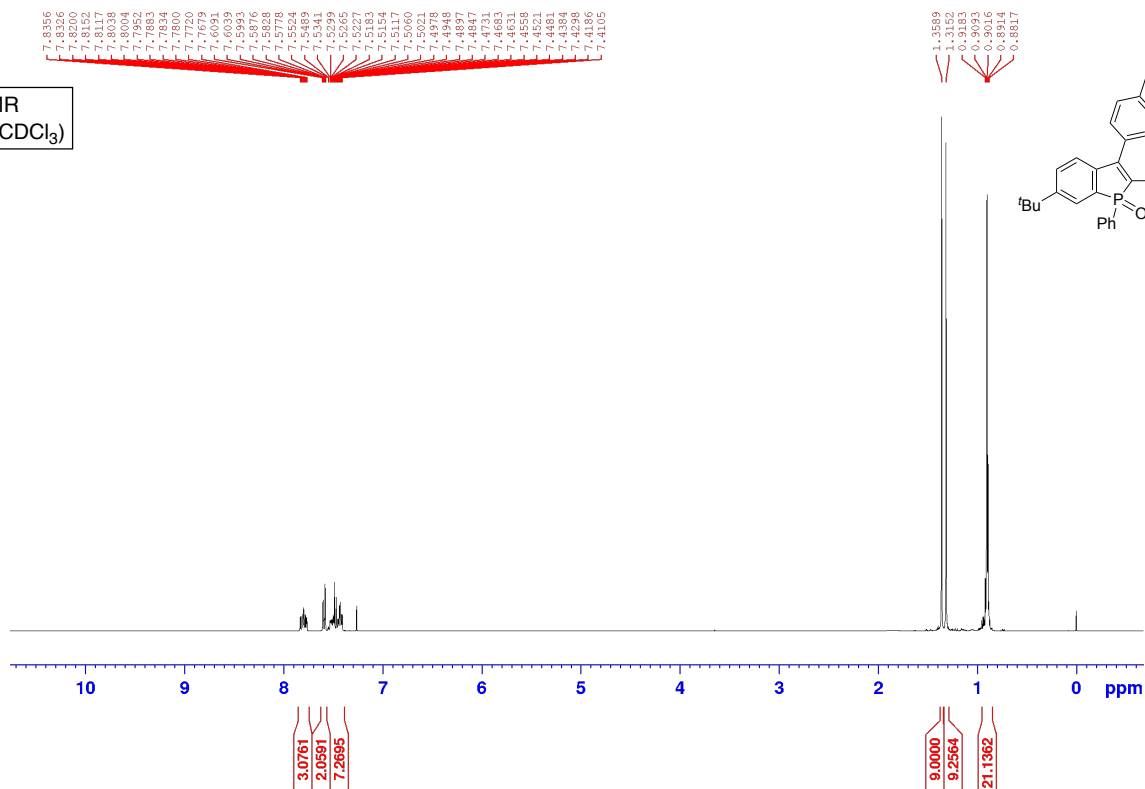

$^{13}\text{C}\{^1\text{H}\}$  NMR  
(100 MHz,  $\text{CDCl}_3$ )

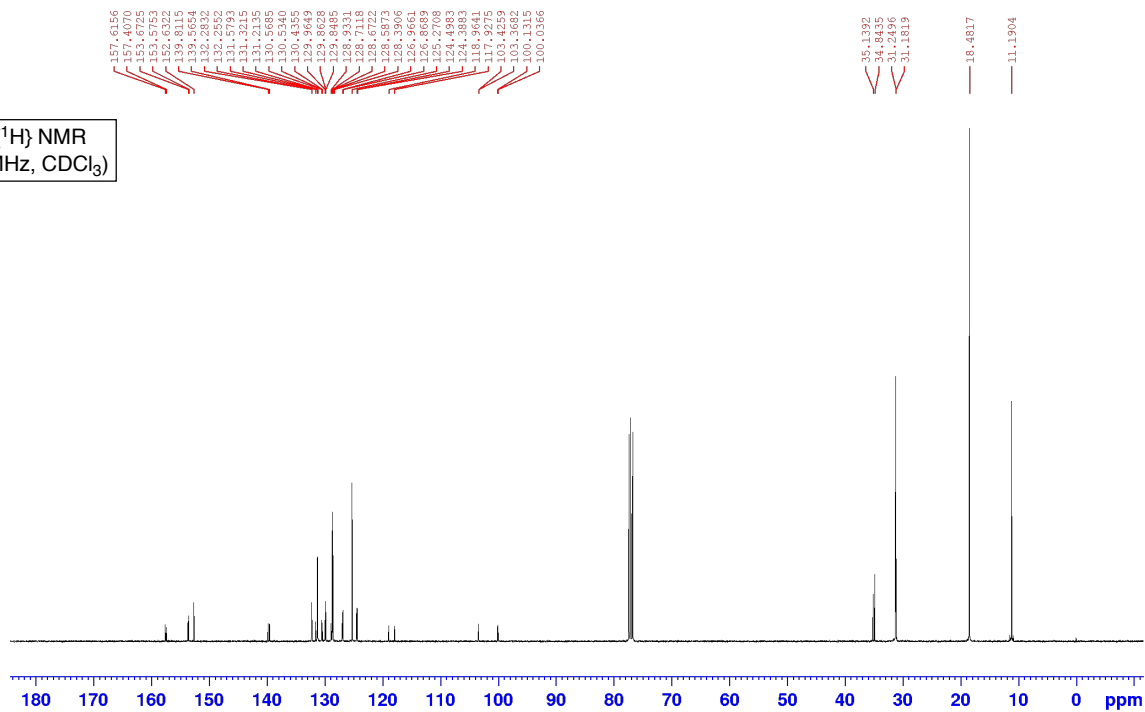

$^{31}\text{P}\{^1\text{H}\}$  NMR  
(162 MHz,  $\text{CDCl}_3$ )

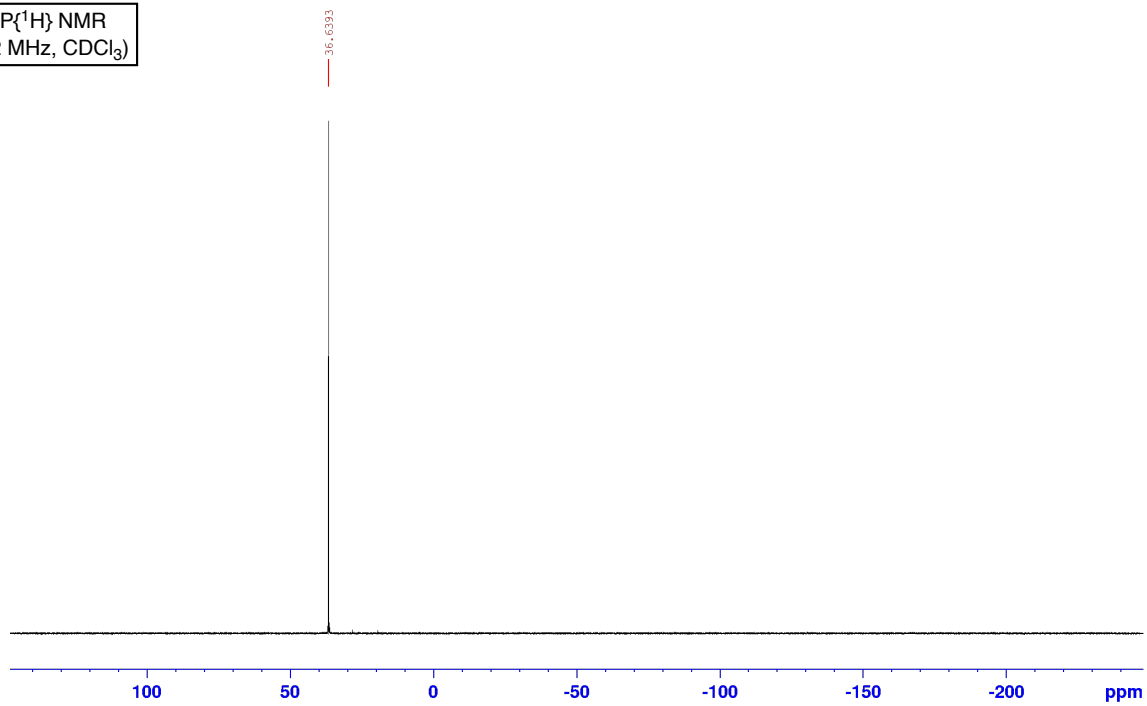

[ $^1\text{H}$ ,  $^{13}\text{C}\{^1\text{H}\}$ ,  $^{19}\text{F}\{^1\text{H}\}$ , and  $^{31}\text{P}\{^1\text{H}\}$ ] NMR Spectra of **3da**

$^1\text{H}$  NMR  
(400 MHz,  $\text{CDCl}_3$ )

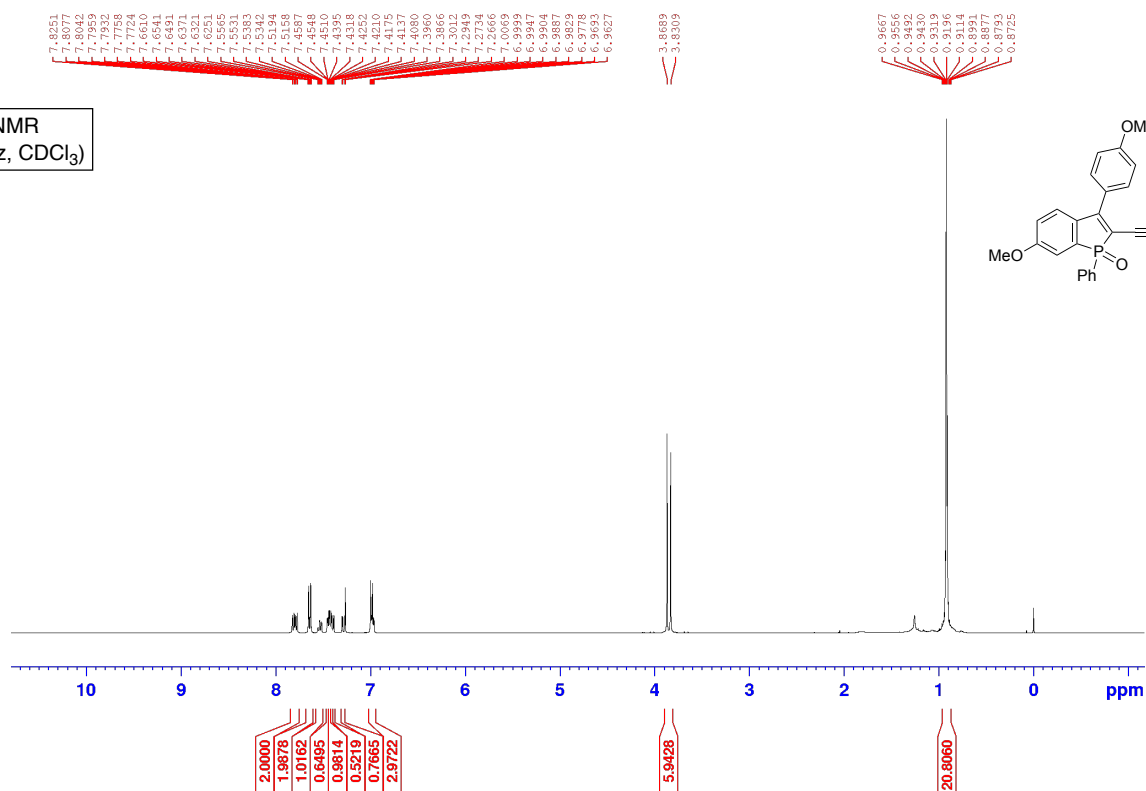

$^{13}\text{C}\{^1\text{H}\}$  NMR  
(100 MHz,  $\text{CDCl}_3$ )

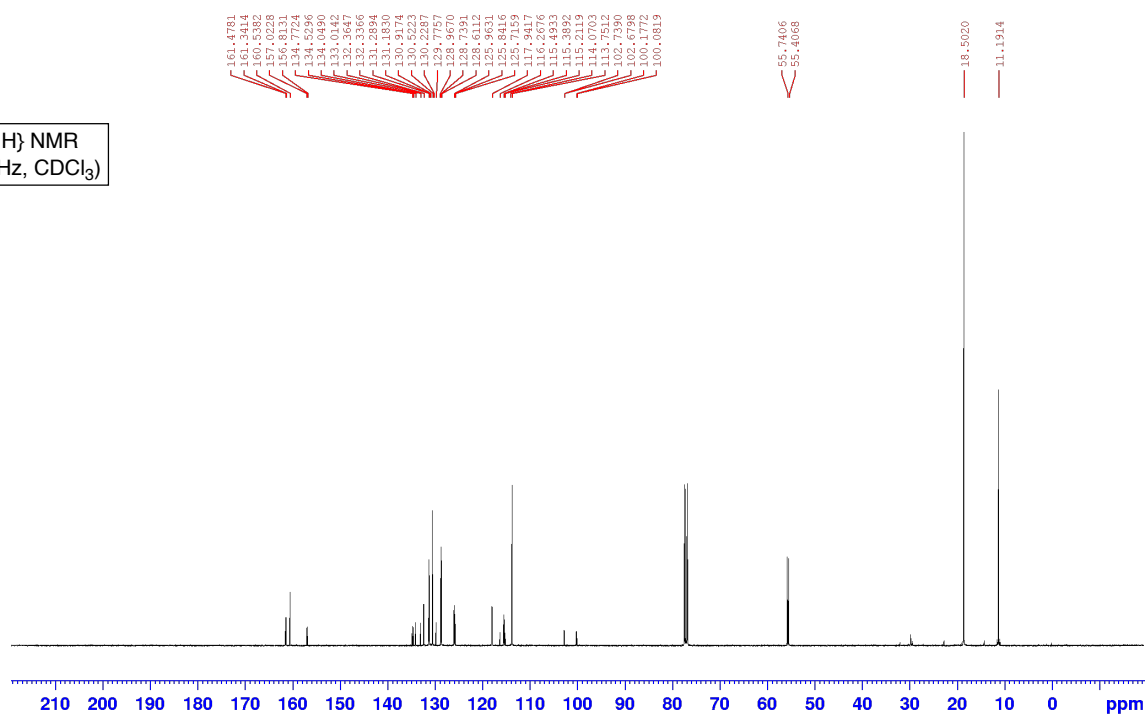

$^{31}\text{P}\{^1\text{H}\}$  NMR  
(162 MHz,  $\text{CDCl}_3$ )

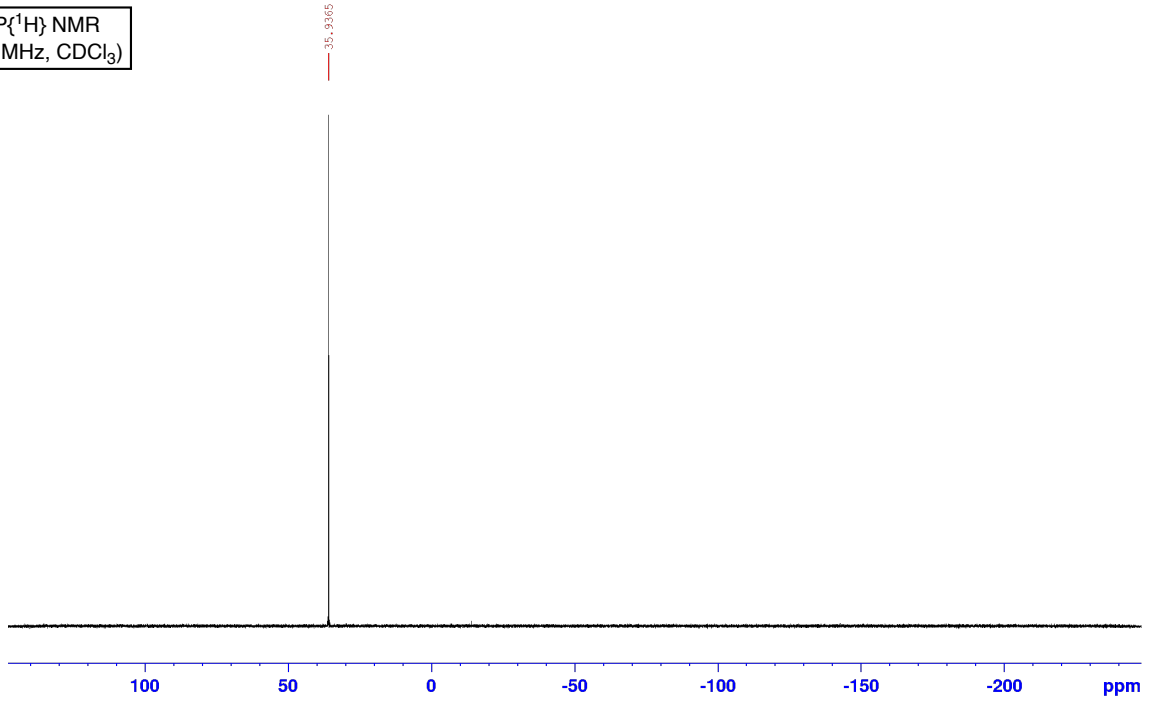

[<sup>1</sup>H, <sup>13</sup>C{<sup>1</sup>H}, and <sup>31</sup>P{<sup>1</sup>H} NMR Spectra of **3ea**]

<sup>1</sup>H NMR  
(400 MHz, CDCl<sub>3</sub>)

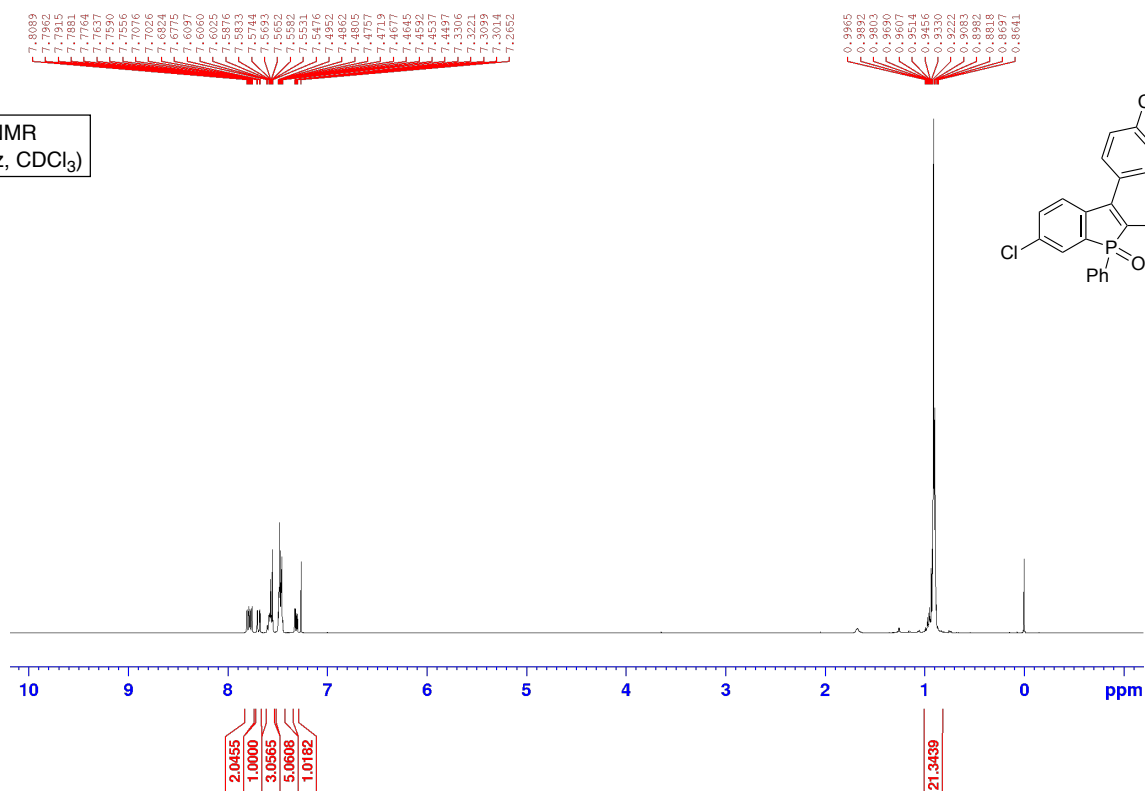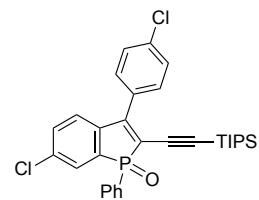

<sup>13</sup>C{<sup>1</sup>H} NMR  
(100 MHz, CDCl<sub>3</sub>)

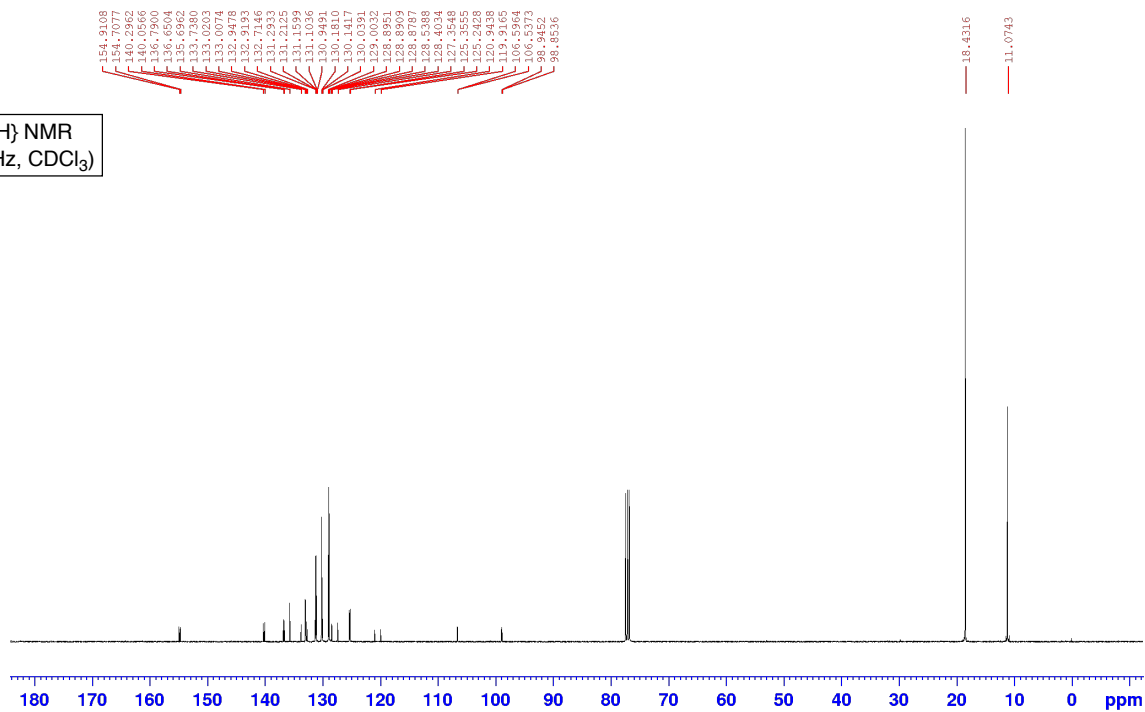

$^{31}\text{P}\{^1\text{H}\}$  NMR  
(162 MHz,  $\text{CDCl}_3$ )

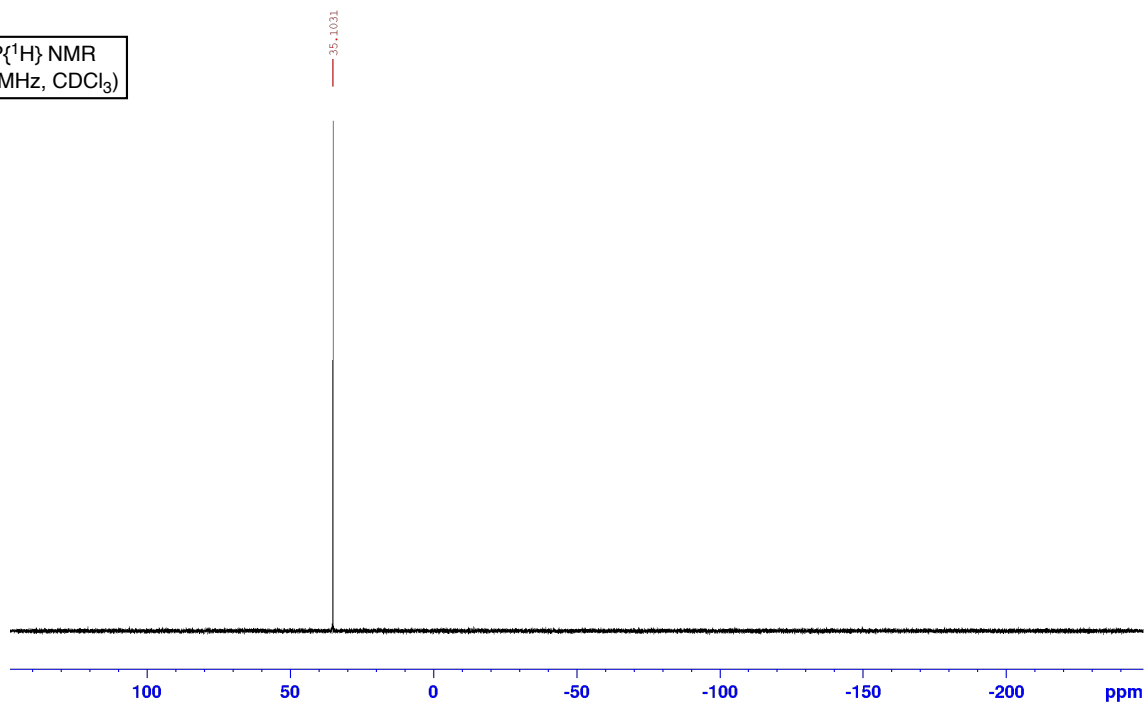



[<sup>1</sup>H, <sup>13</sup>C{<sup>1</sup>H}, <sup>19</sup>F{<sup>1</sup>H}, and <sup>31</sup>P{<sup>1</sup>H} NMR Spectra of **3fa**]

<sup>1</sup>H NMR  
(400 MHz, CDCl<sub>3</sub>)

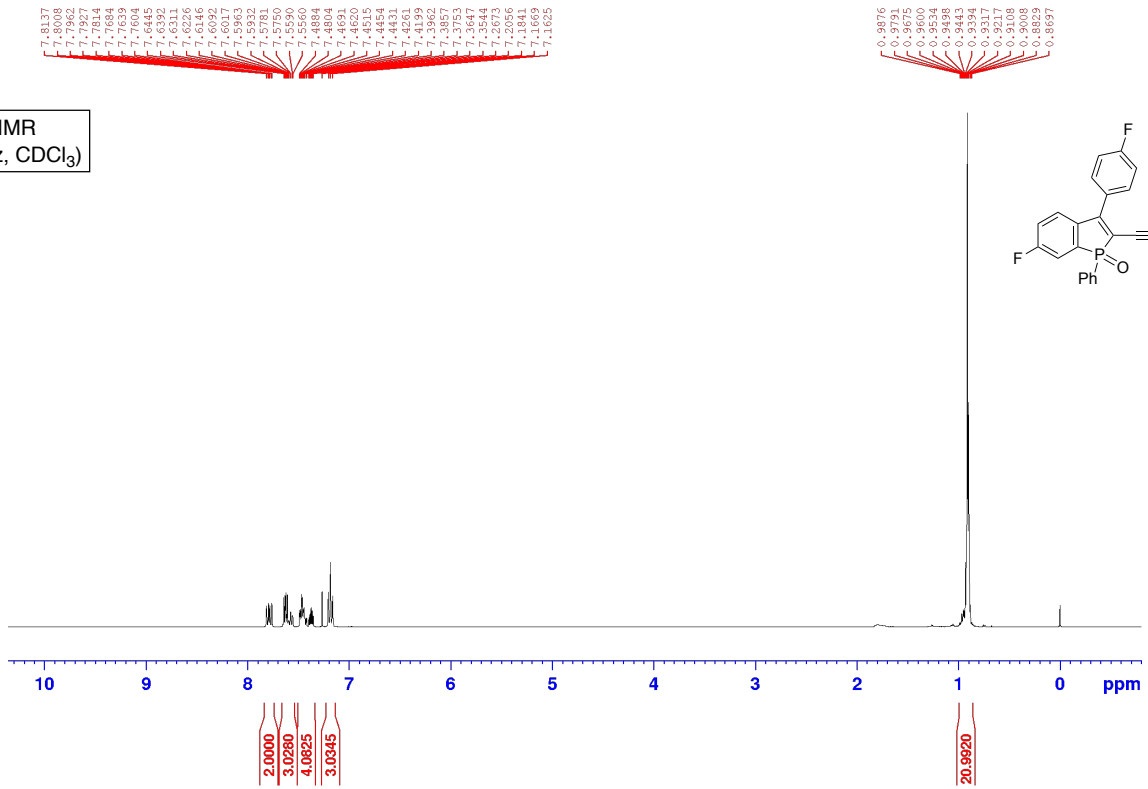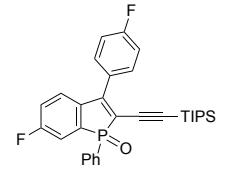

<sup>13</sup>C{<sup>1</sup>H} NMR  
(100 MHz, CDCl<sub>3</sub>)

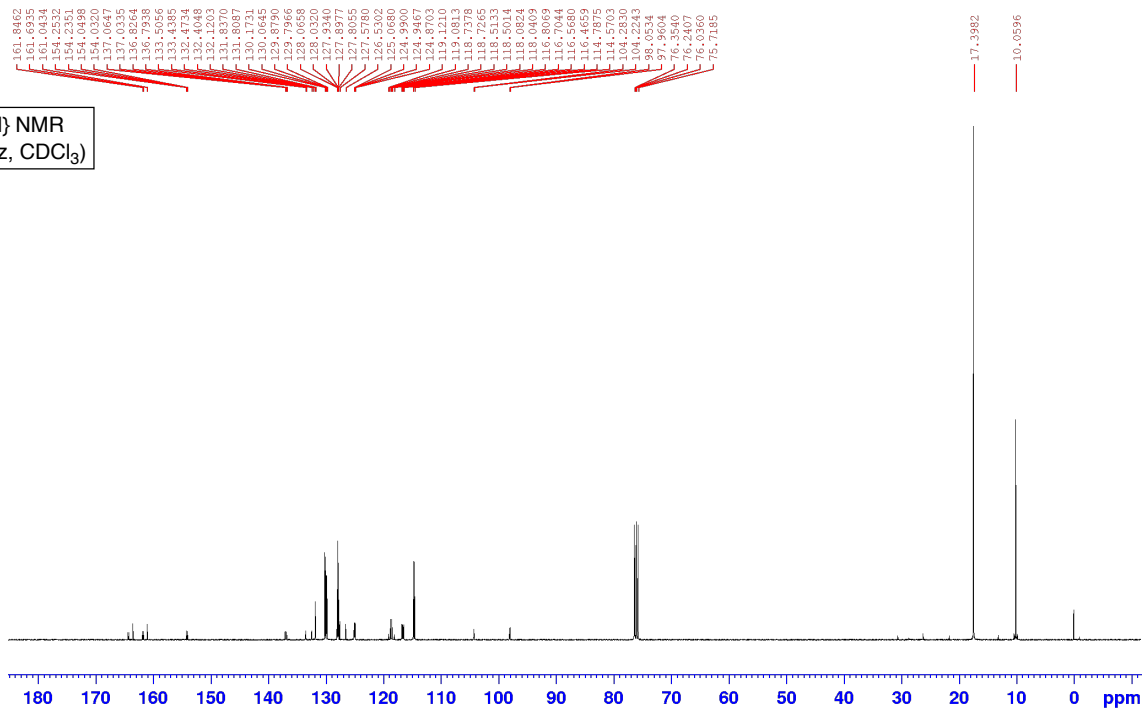

$^{19}\text{F}\{^1\text{H}\}$  NMR  
(376 MHz,  $\text{CDCl}_3$ )

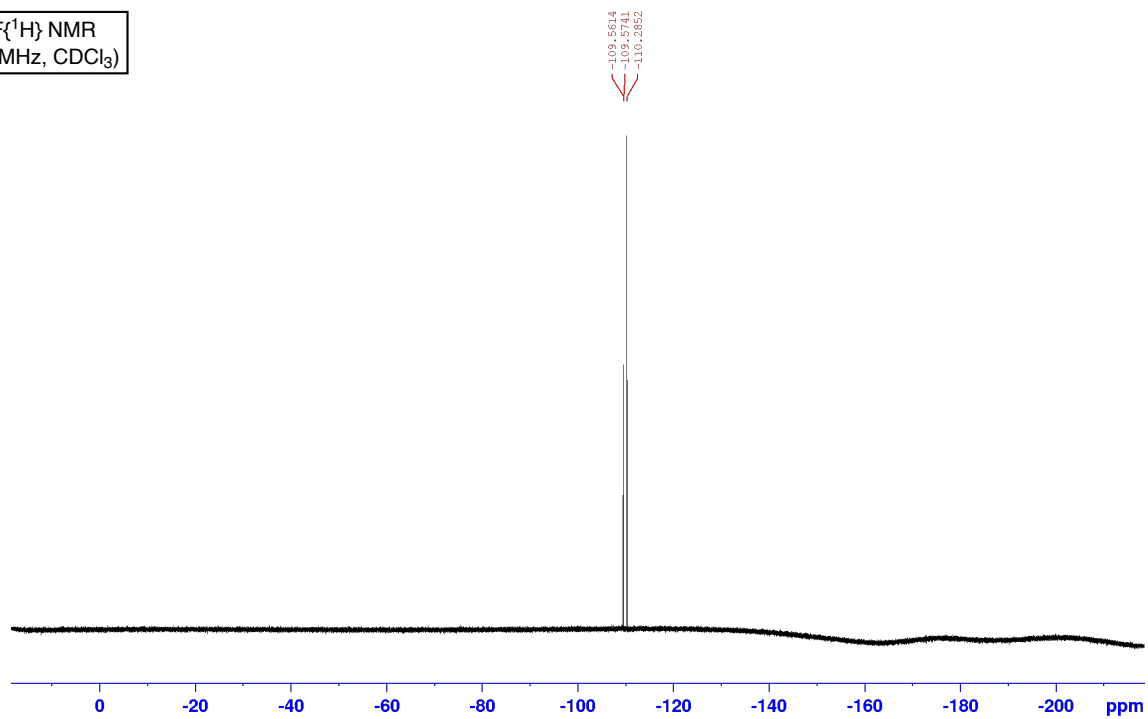

$^{31}\text{P}\{^1\text{H}\}$  NMR  
(162 MHz,  $\text{CDCl}_3$ )

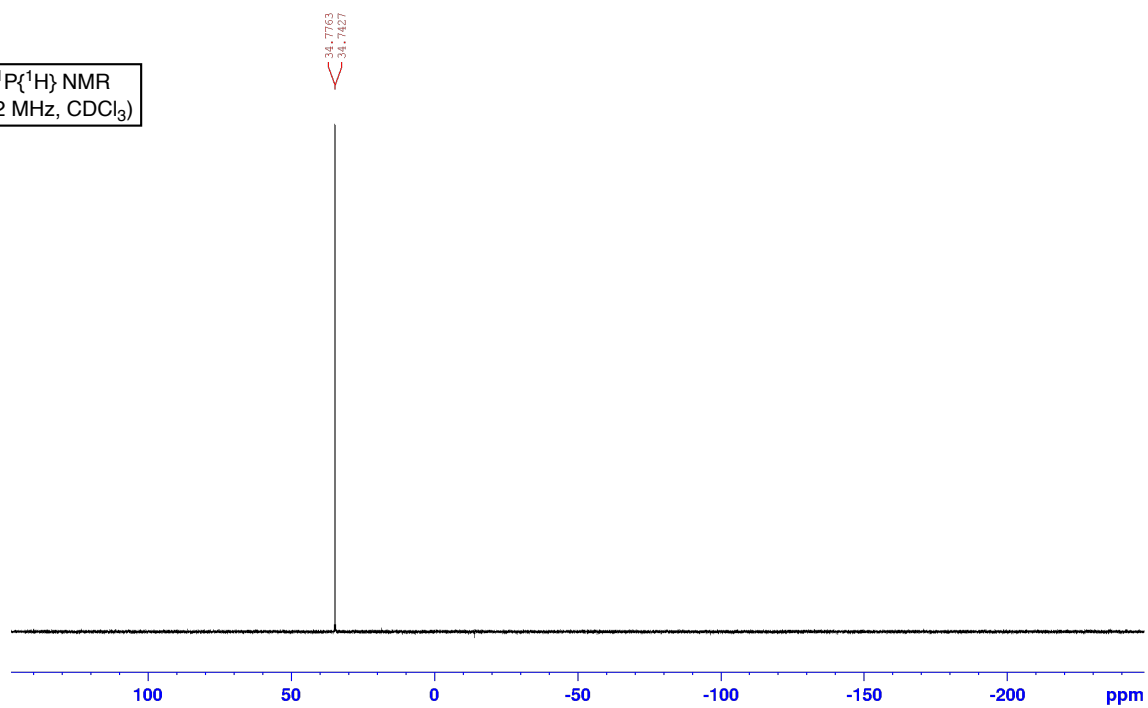

[ $^1\text{H}$ ,  $^{13}\text{C}\{^1\text{H}\}$ ,  $^{19}\text{F}\{^1\text{H}\}$ , and  $^{31}\text{P}\{^1\text{H}\}$ ] NMR Spectra of **3ga**

$^1\text{H}$  NMR  
(400 MHz,  $\text{CDCl}_3$ )

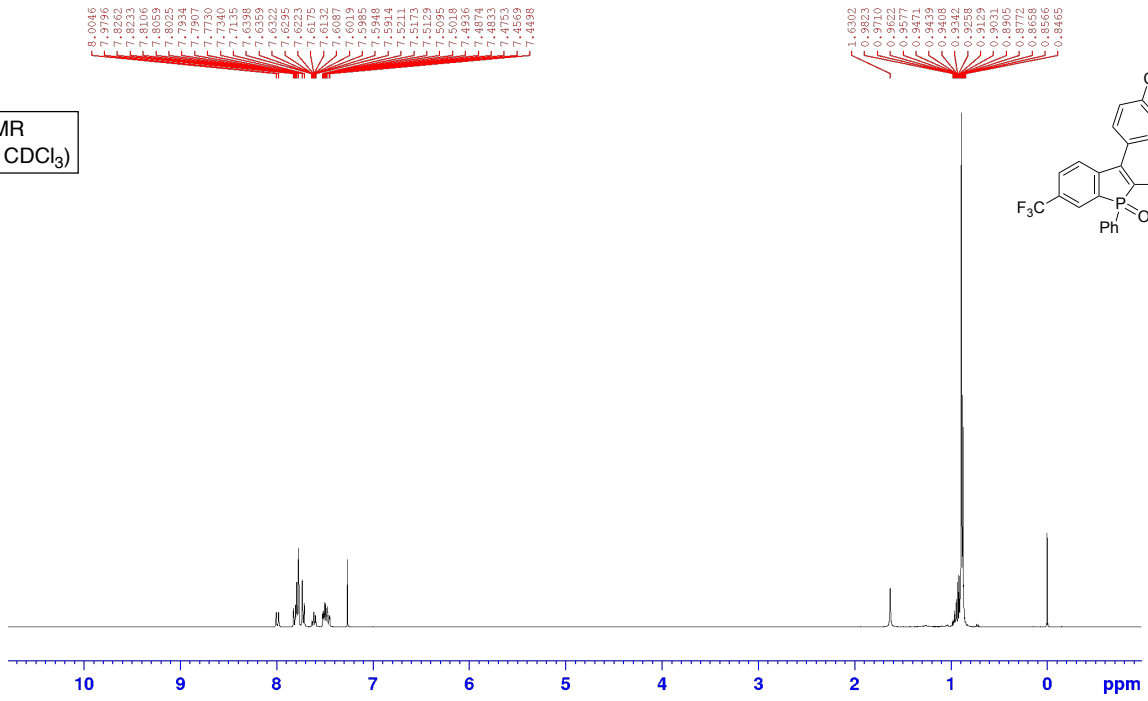

$^{13}\text{C}\{^1\text{H}\}$  NMR  
(100 MHz,  $\text{CDCl}_3$ )

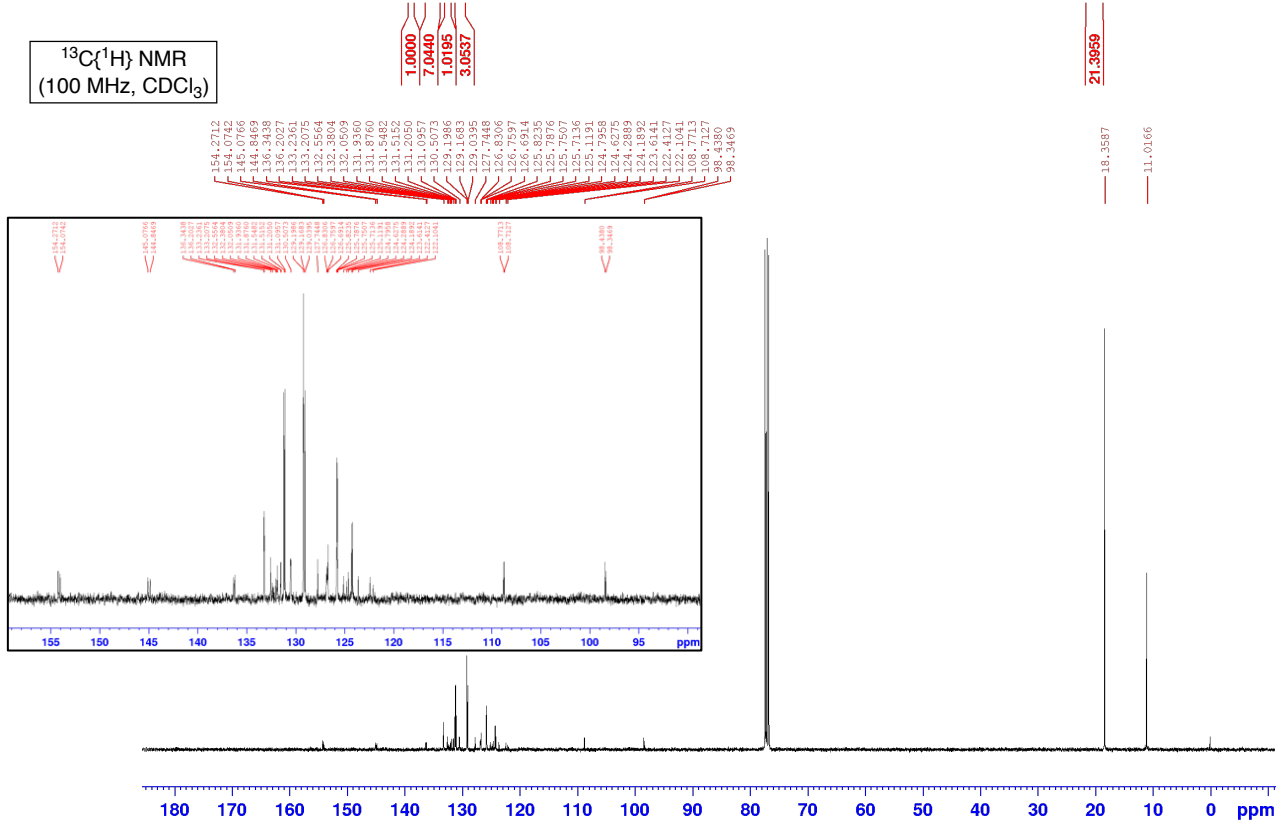

$^{19}\text{F}\{^1\text{H}\}$  NMR  
(376 MHz,  $\text{CDCl}_3$ )

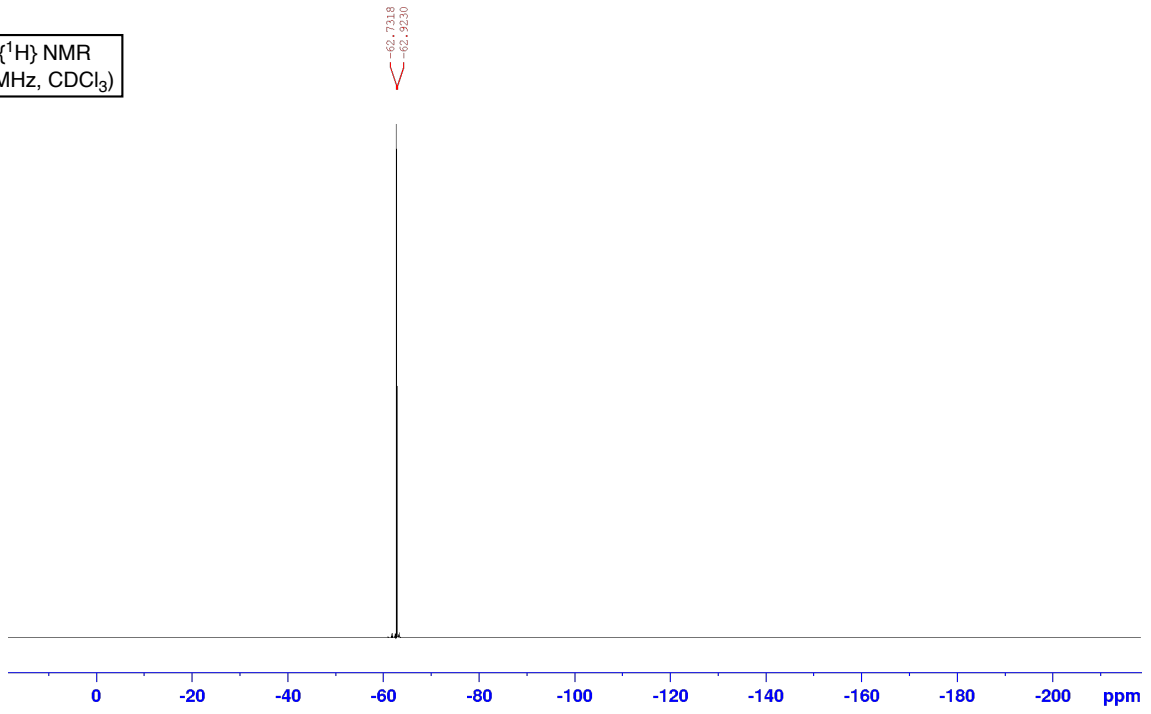

$^{31}\text{P}\{^1\text{H}\}$  NMR  
(162 MHz,  $\text{CDCl}_3$ )

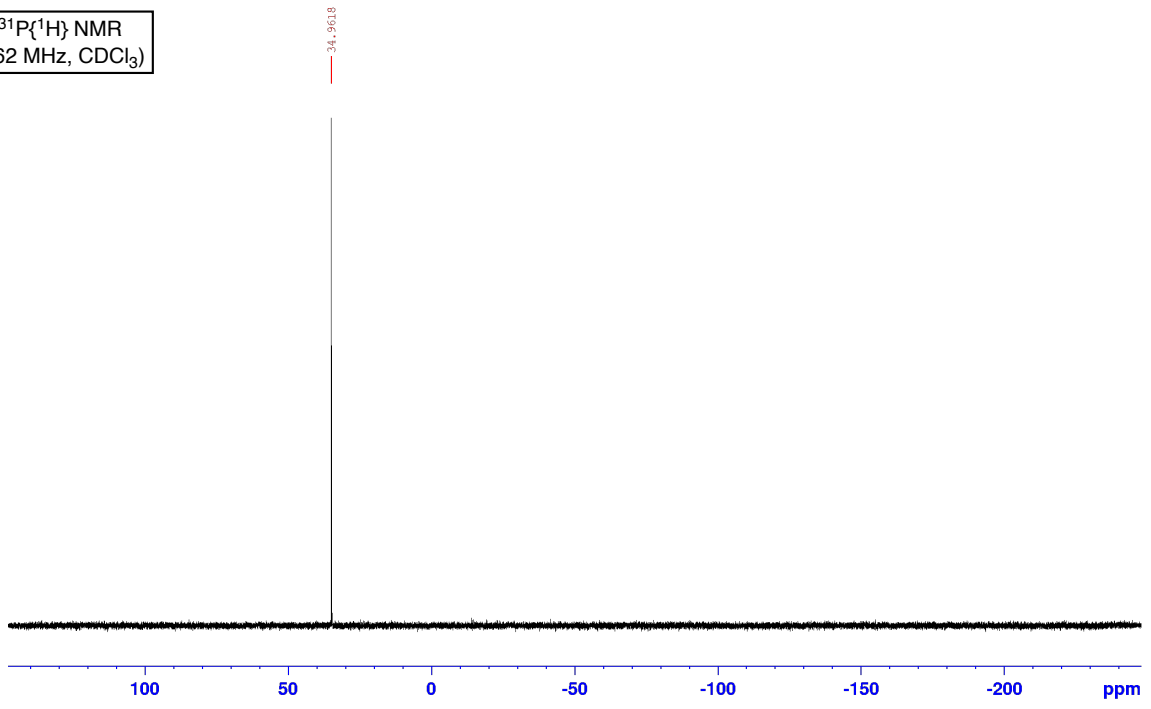

$^1\text{H}$ ,  $^{13}\text{C}\{^1\text{H}\}$ , and  $^{31}\text{P}\{^1\text{H}\}$  NMR Spectra of **3ha**

$^1\text{H}$  NMR  
(400 MHz,  $\text{CDCl}_3$ )

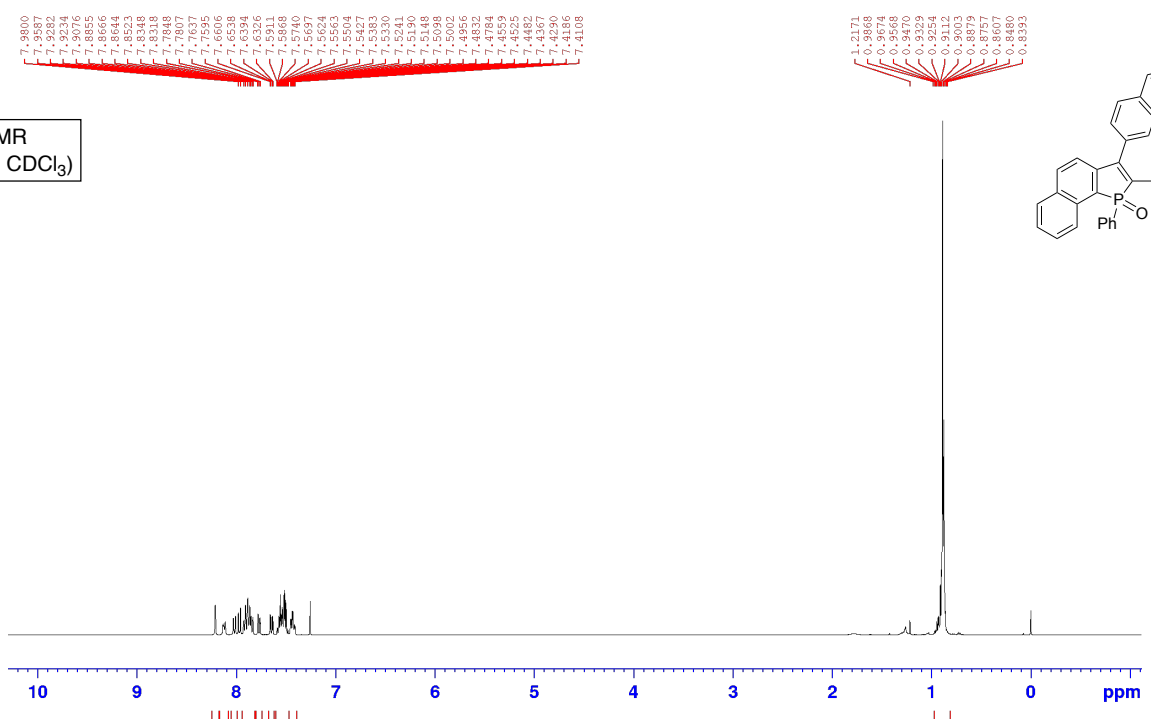

$^{13}\text{C}\{^1\text{H}\}$  NMR  
(100 MHz,  $\text{CDCl}_3$ )

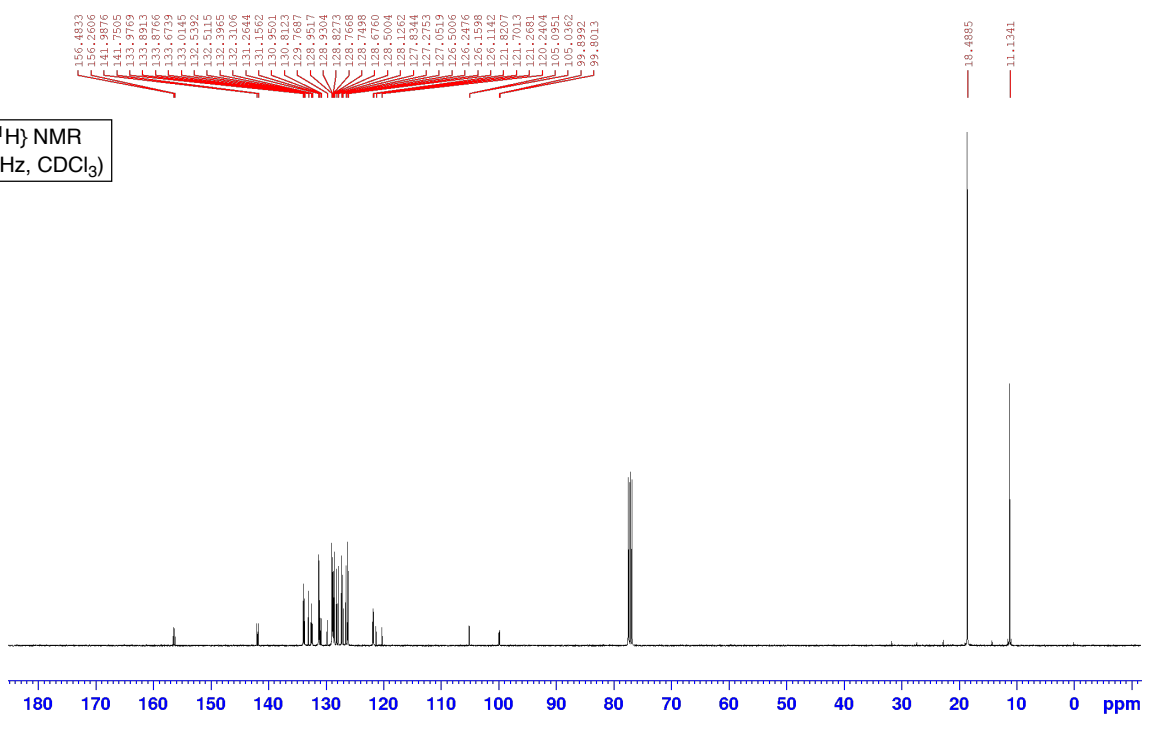

$^{31}\text{P}\{^1\text{H}\}$  NMR  
(162 MHz,  $\text{CDCl}_3$ )

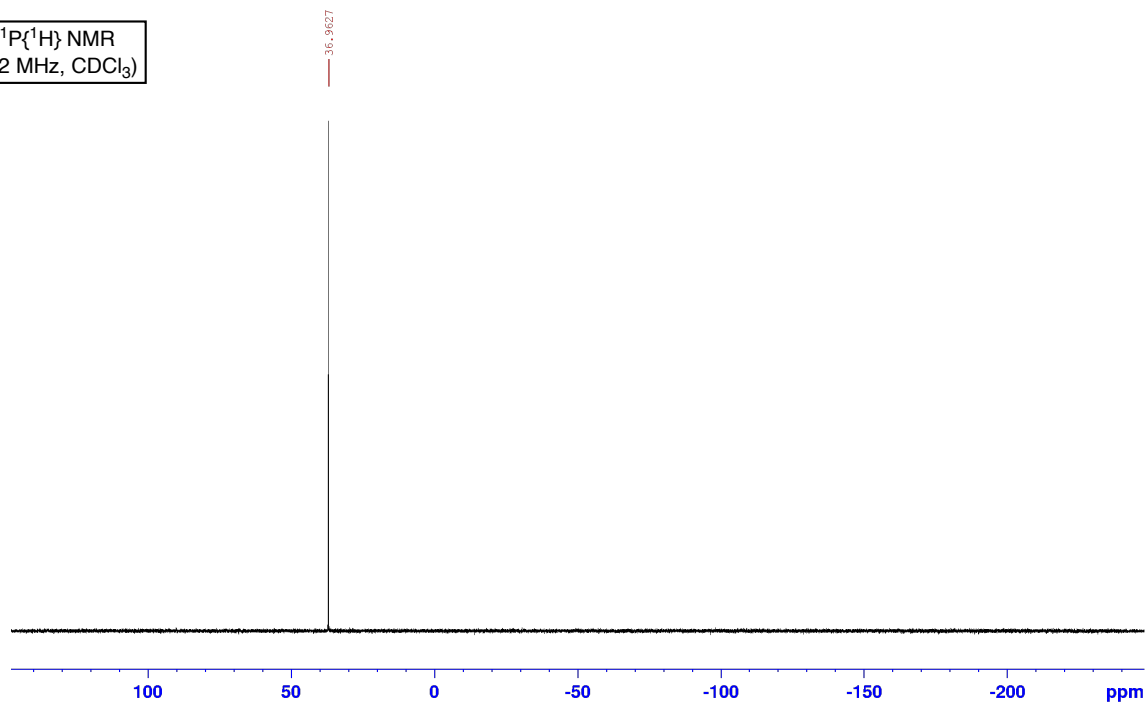

[<sup>1</sup>H, <sup>13</sup>C{<sup>1</sup>H}, and <sup>31</sup>P{<sup>1</sup>H} NMR Spectra of **3ia**]

<sup>1</sup>H NMR  
(400 MHz, CDCl<sub>3</sub>)

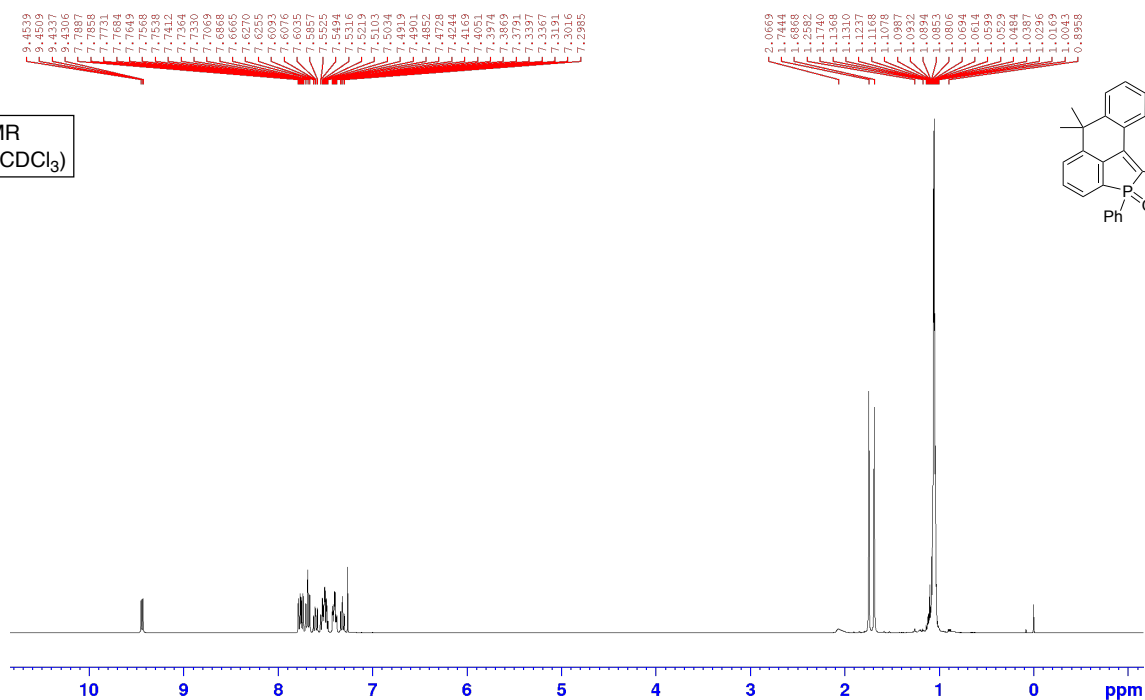

<sup>13</sup>C{<sup>1</sup>H} NMR  
(100 MHz, CDCl<sub>3</sub>)

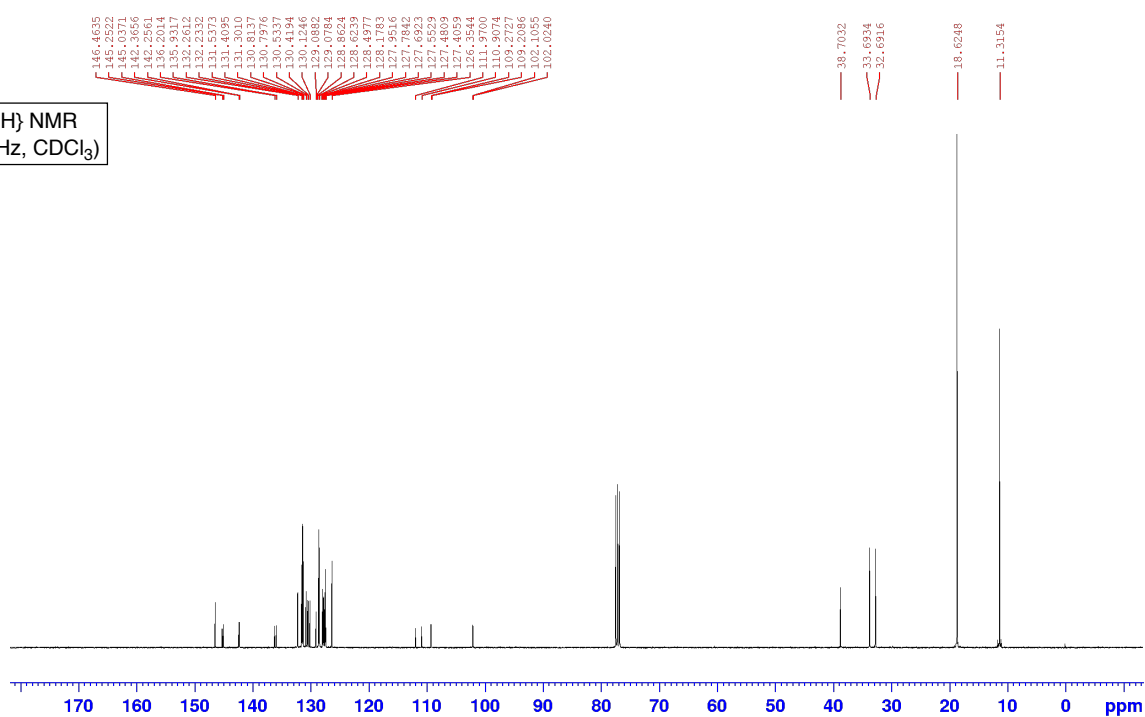

$^{31}\text{P}\{^1\text{H}\}$  NMR  
(162 MHz,  $\text{CDCl}_3$ )

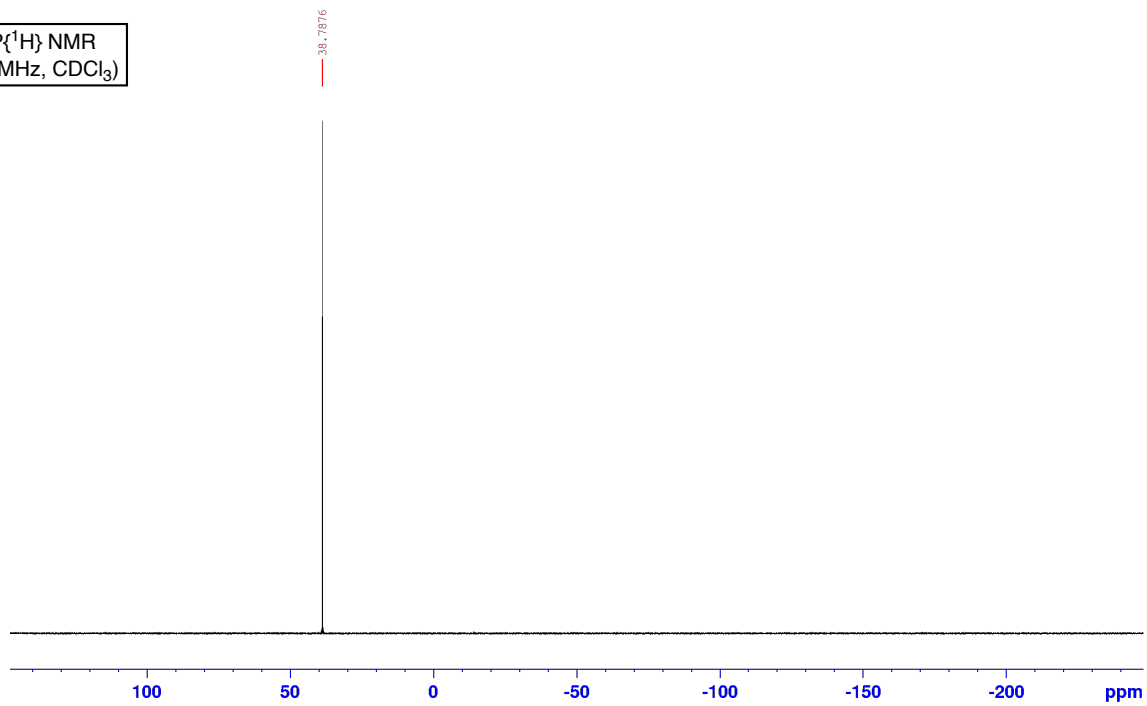



[<sup>1</sup>H, <sup>13</sup>C{<sup>1</sup>H}, and <sup>31</sup>P{<sup>1</sup>H} NMR Spectra of **3ab**]

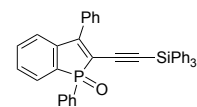

<sup>1</sup>H NMR  
(400 MHz, CDCl<sub>3</sub>)

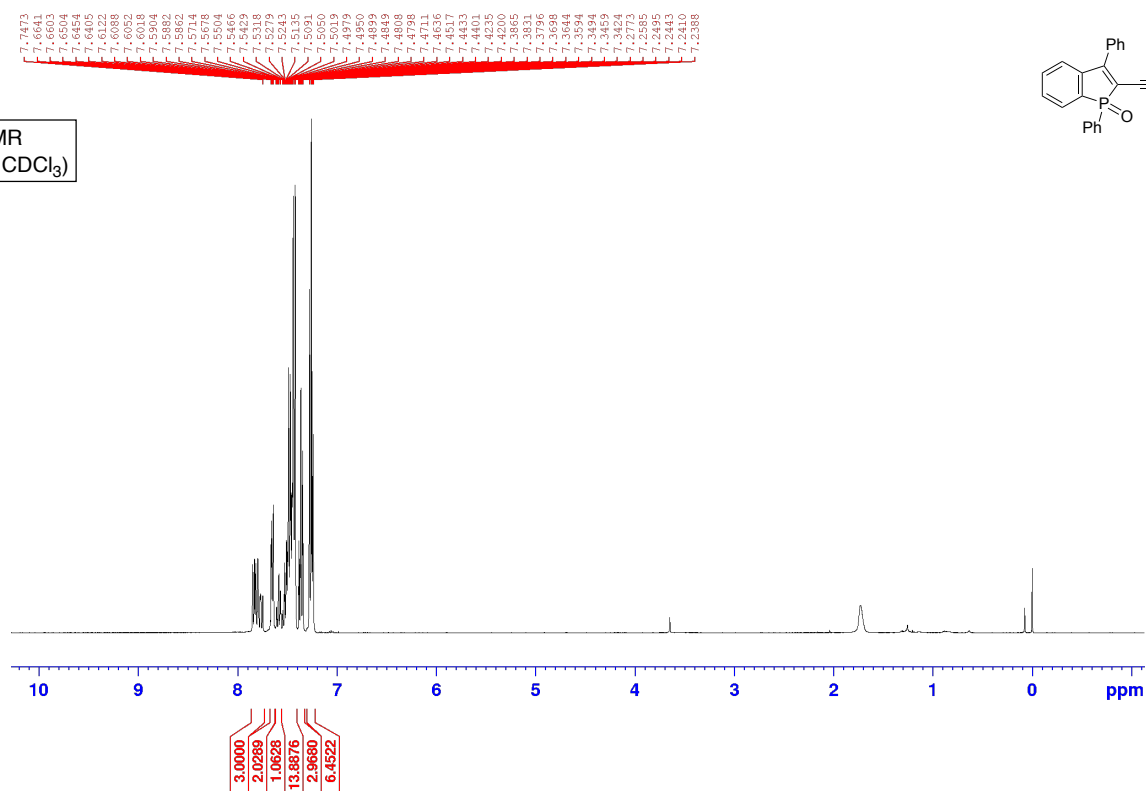

<sup>13</sup>C{<sup>1</sup>H} NMR  
(100 MHz, CDCl<sub>3</sub>)

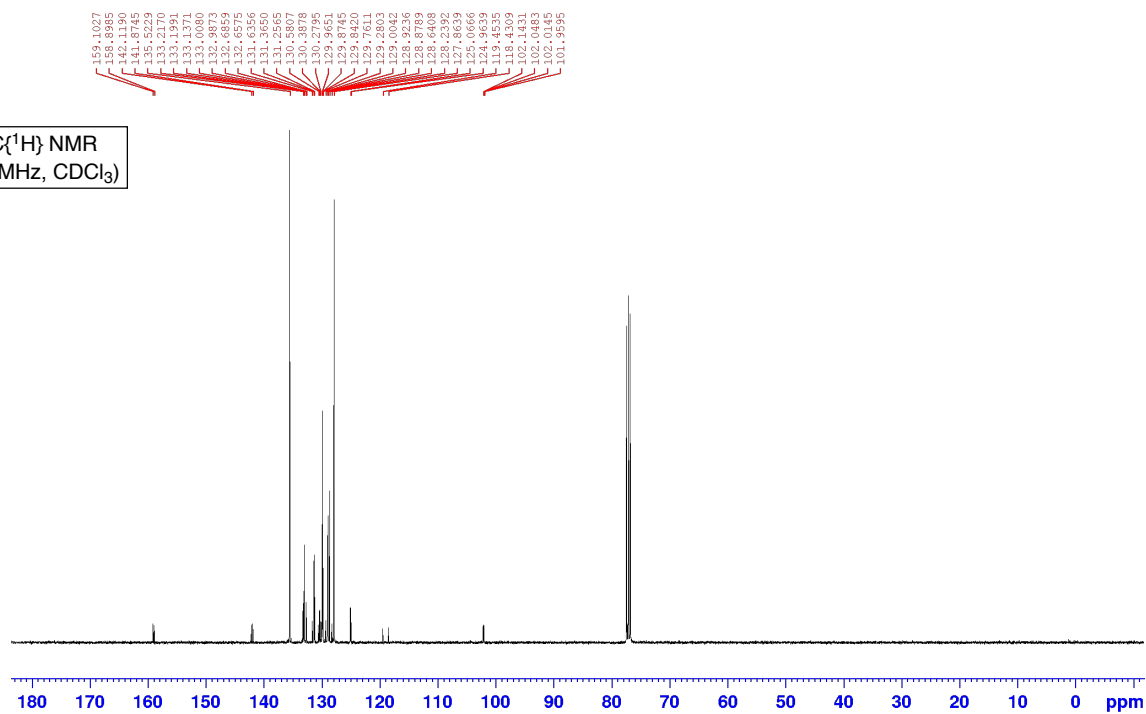

$^{31}\text{P}\{^1\text{H}\}$  NMR  
(162 MHz,  $\text{CDCl}_3$ )

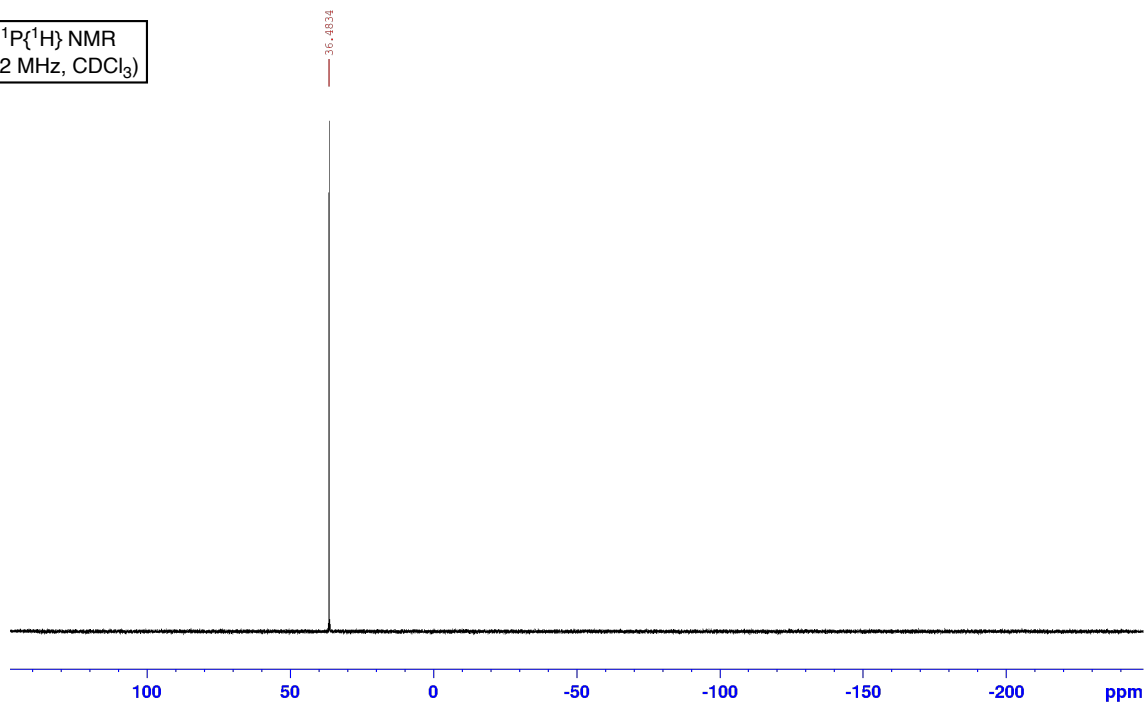

$^1\text{H}$ ,  $^{13}\text{C}\{^1\text{H}\}$ , and  $^{31}\text{P}\{^1\text{H}\}$  NMR Spectra of **3ac**

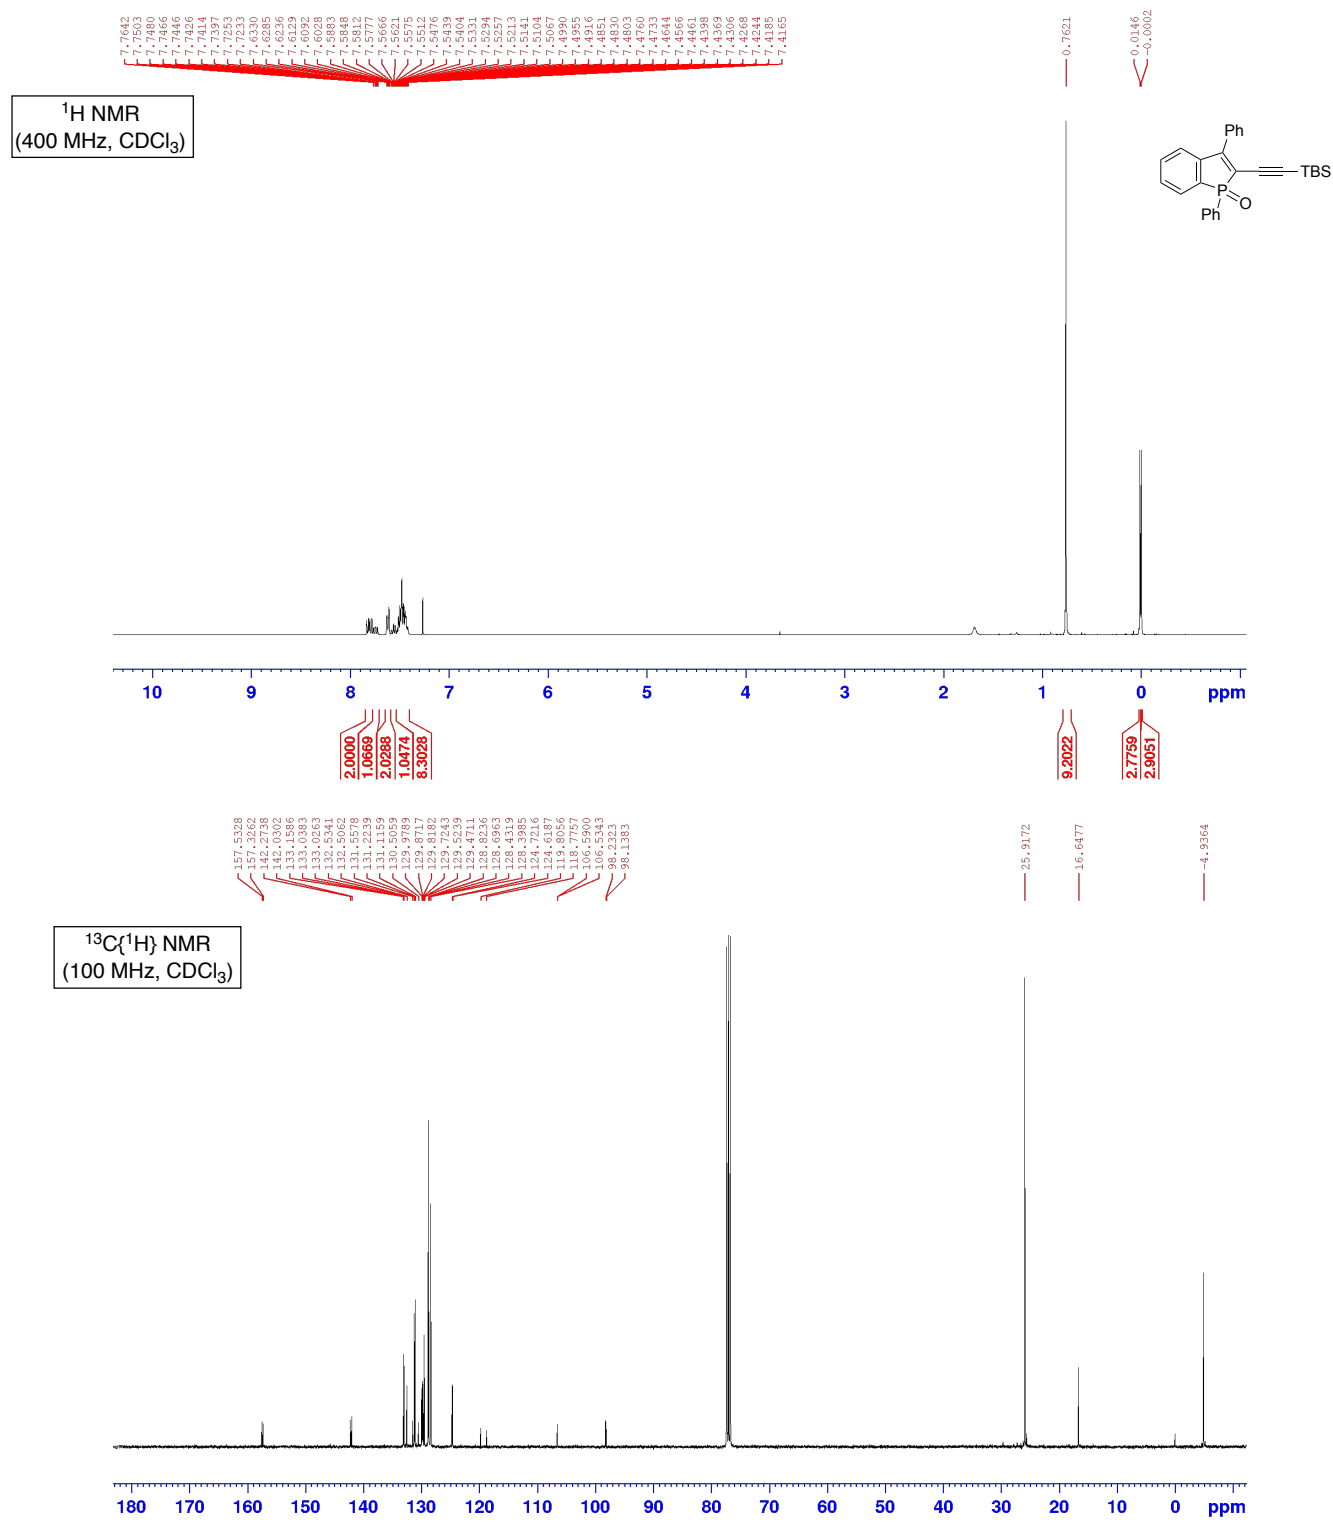

$^{31}\text{P}\{^1\text{H}\}$  NMR  
(162 MHz,  $\text{CDCl}_3$ )

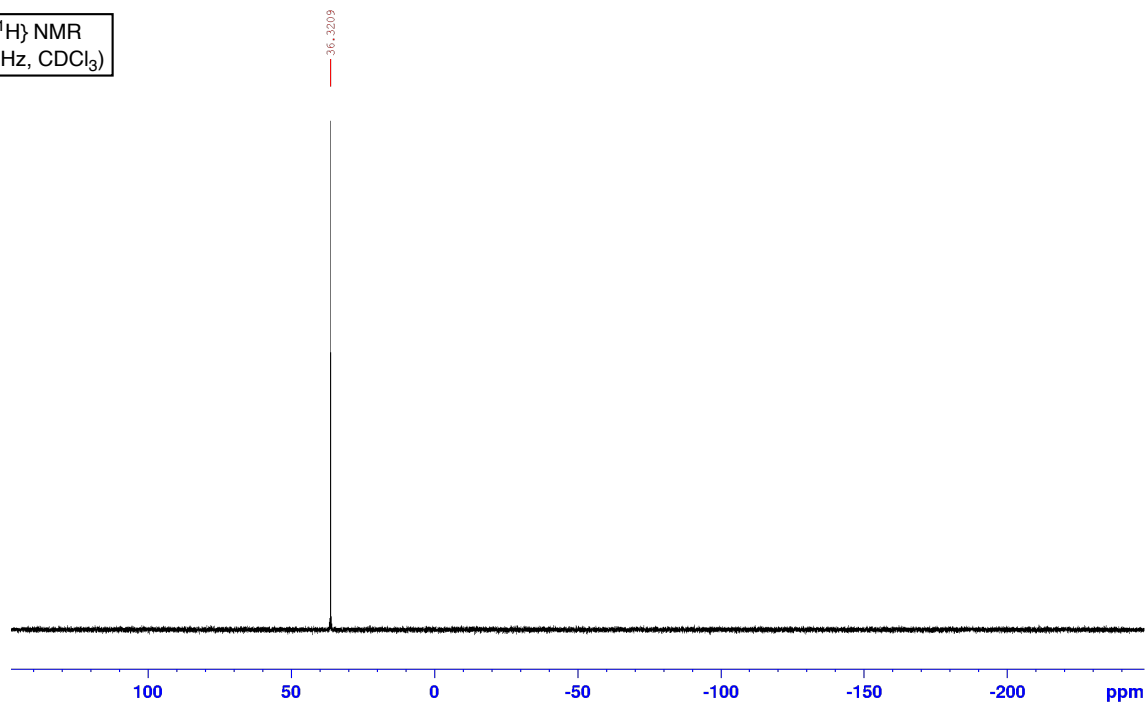

[ $^1\text{H}$ ,  $^{13}\text{C}\{^1\text{H}\}$ , and  $^{31}\text{P}\{^1\text{H}\}$  NMR Spectra of **3ad**]

$^1\text{H}$  NMR  
(400 MHz,  $\text{CDCl}_3$ )

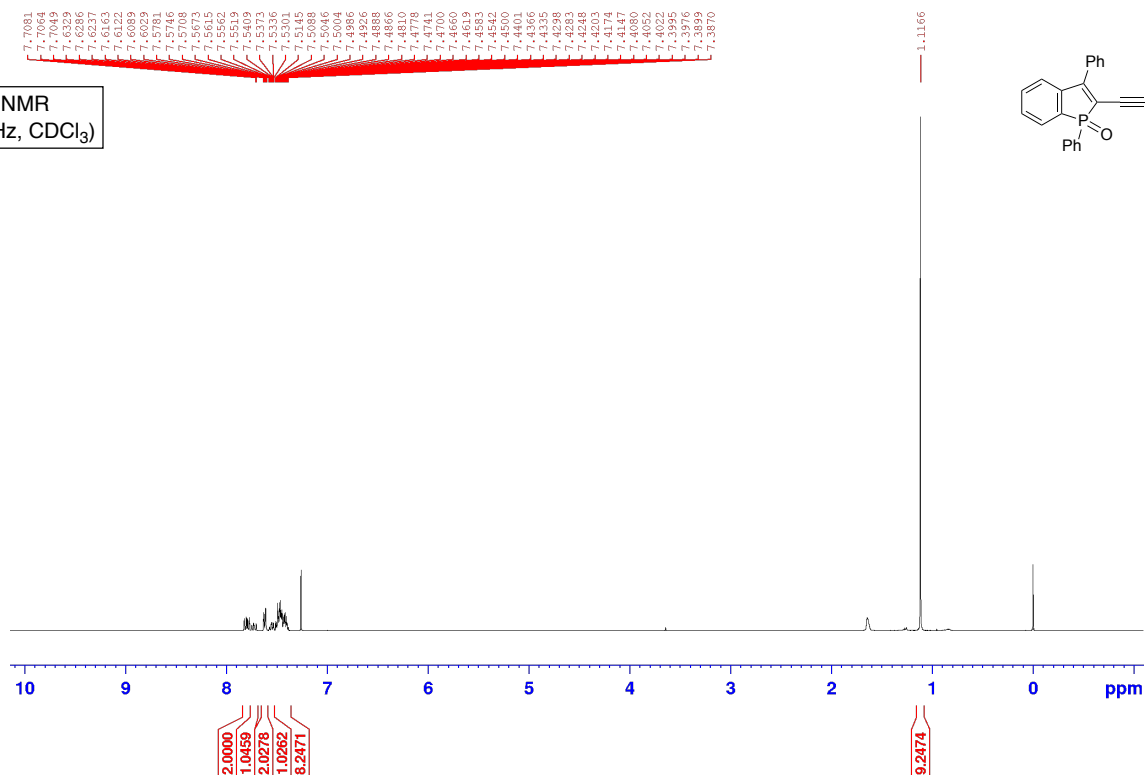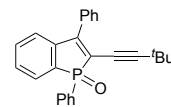

$^{13}\text{C}\{^1\text{H}\}$  NMR  
(100 MHz,  $\text{CDCl}_3$ )

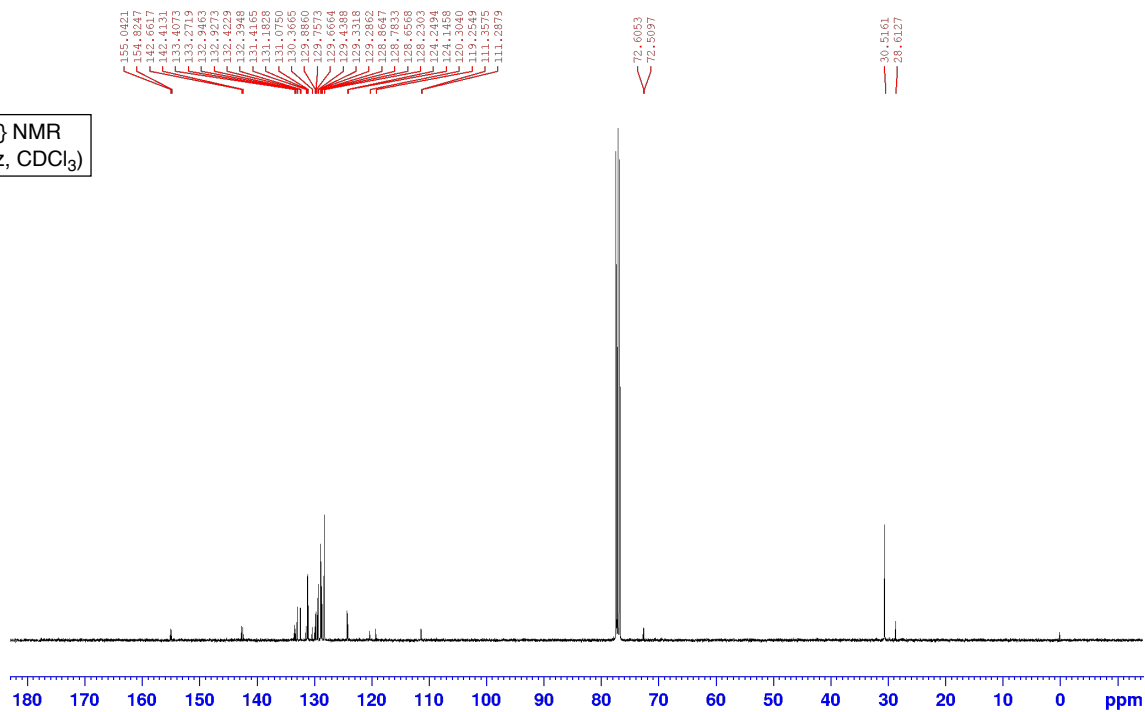

$^{31}\text{P}\{^1\text{H}\}$  NMR  
(162 MHz,  $\text{CDCl}_3$ )

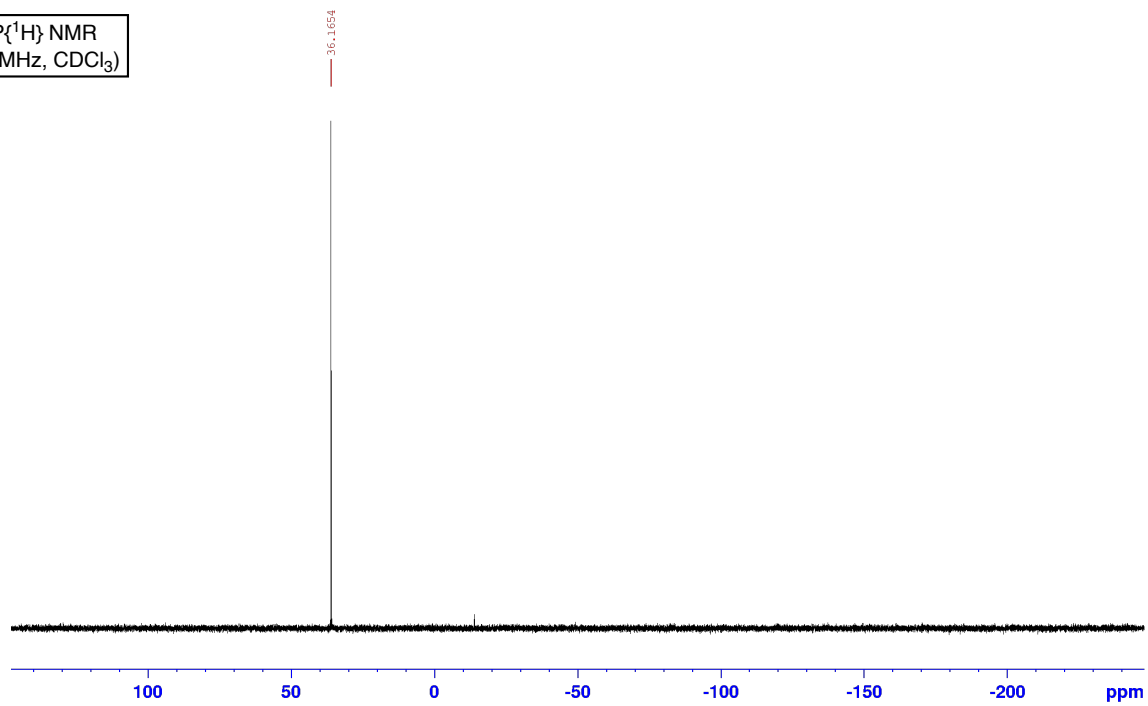

[<sup>1</sup>H, <sup>13</sup>C{<sup>1</sup>H}, and <sup>31</sup>P{<sup>1</sup>H} NMR Spectra of **3ae**]

<sup>1</sup>H NMR  
(400 MHz, CDCl<sub>3</sub>)

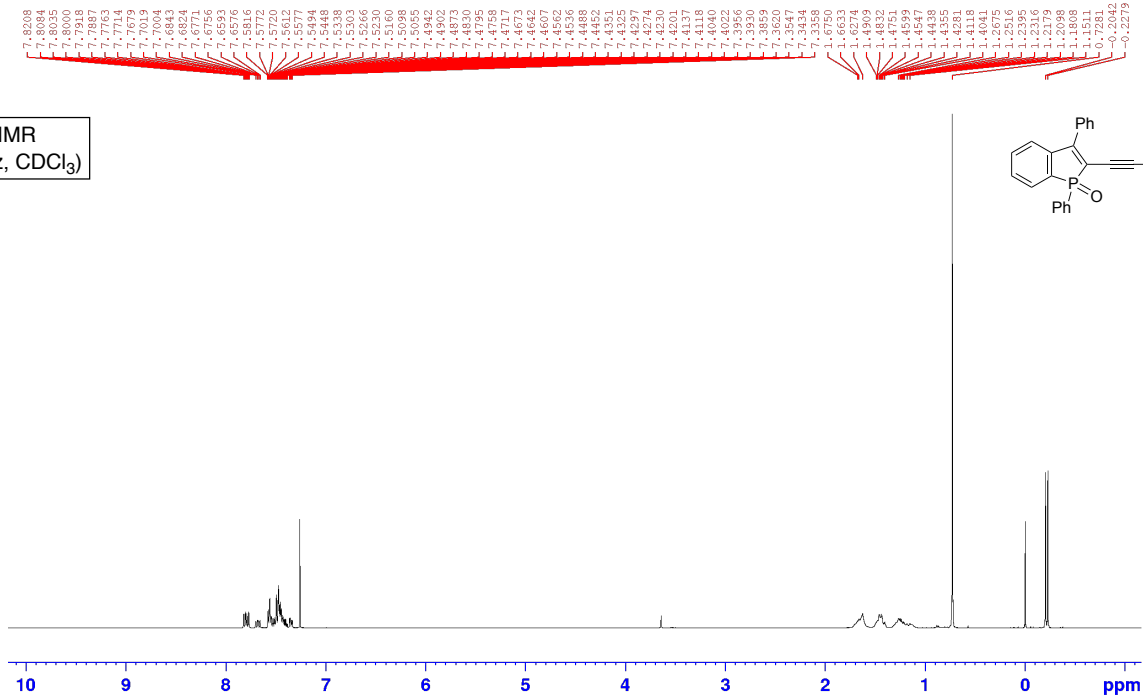

<sup>13</sup>C{<sup>1</sup>H} NMR  
(100 MHz, CDCl<sub>3</sub>)

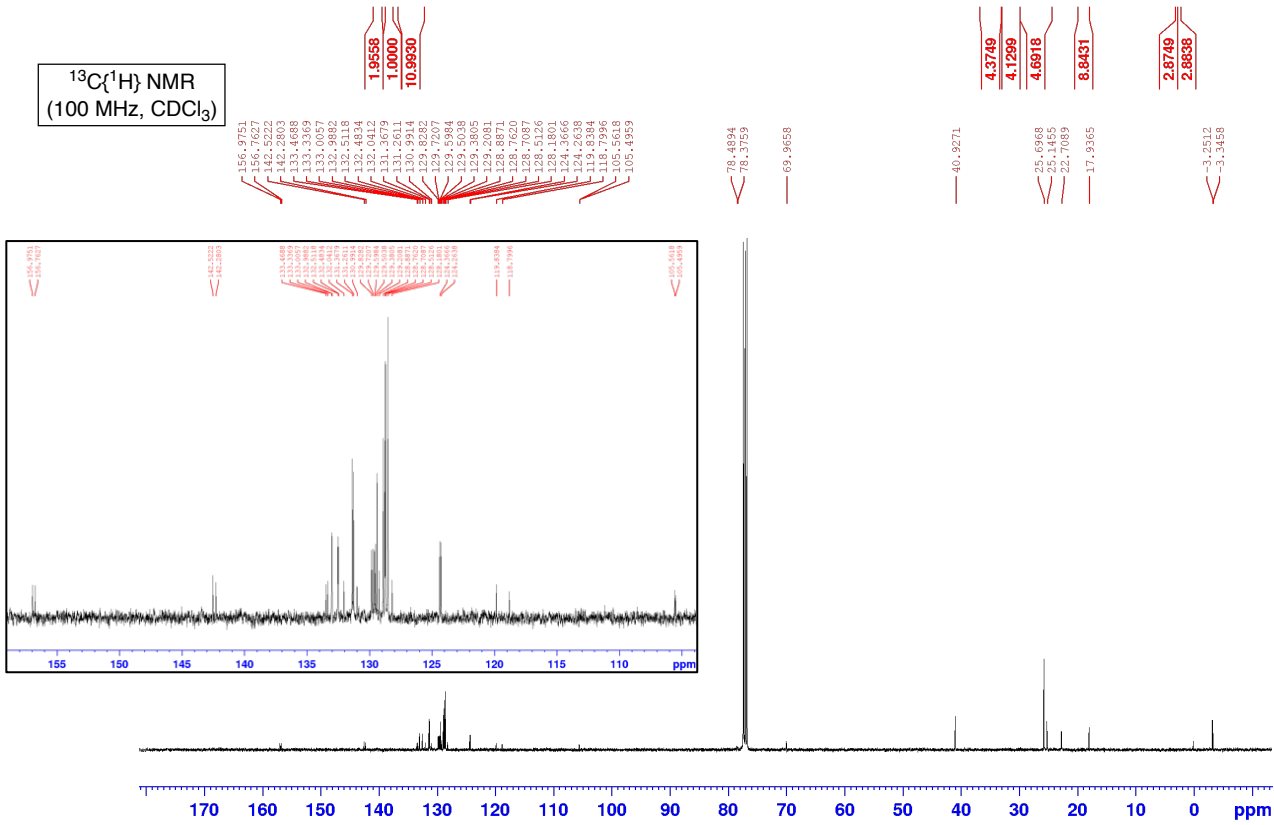

$^{31}\text{P}\{^1\text{H}\}$  NMR  
(162 MHz,  $\text{CDCl}_3$ )

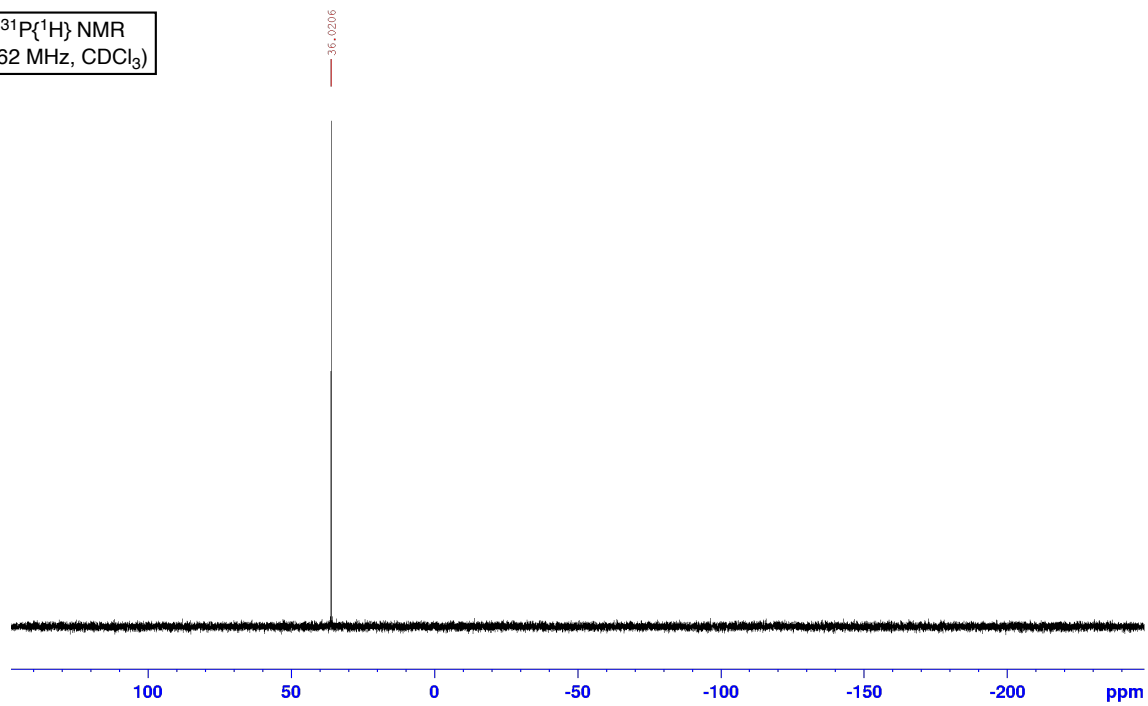



$^1\text{H}$ ,  $^{13}\text{C}\{^1\text{H}\}$ , and  $^{31}\text{P}\{^1\text{H}\}$  NMR Spectra of **3ag**

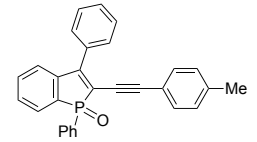

$^1\text{H}$  NMR  
(400 MHz,  $\text{CDCl}_3$ )

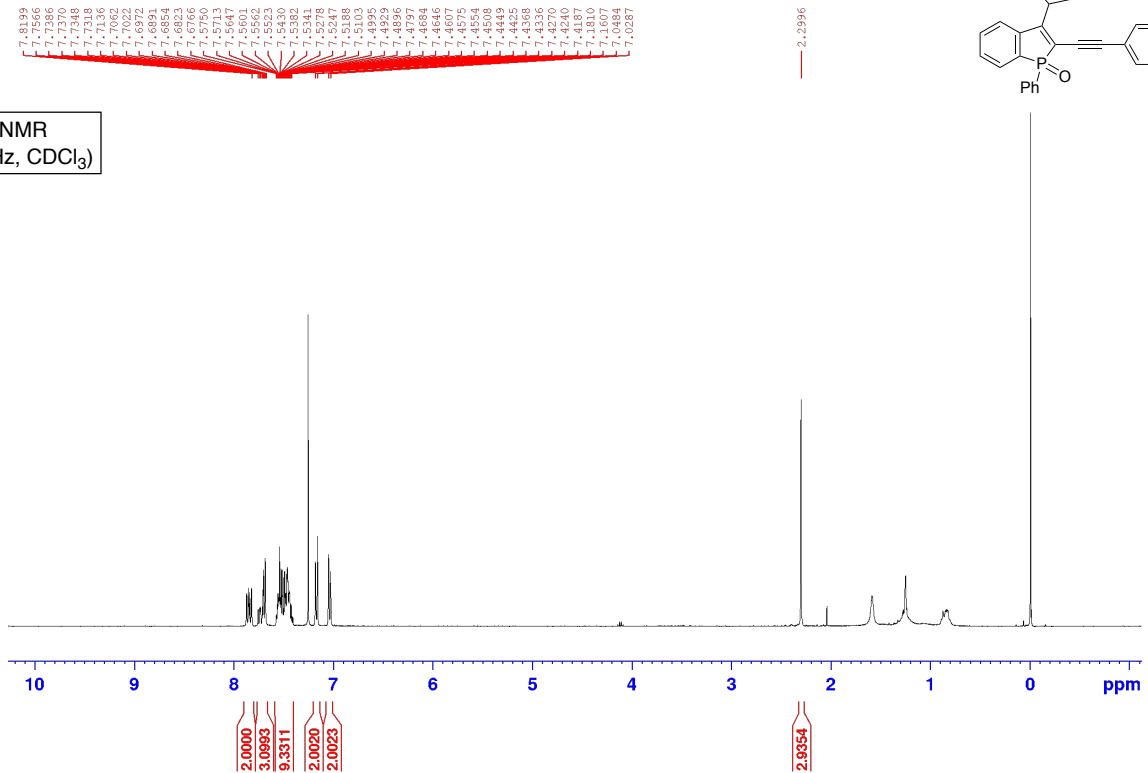

$^{13}\text{C}\{^1\text{H}\}$  NMR  
(100 MHz,  $\text{CDCl}_3$ )

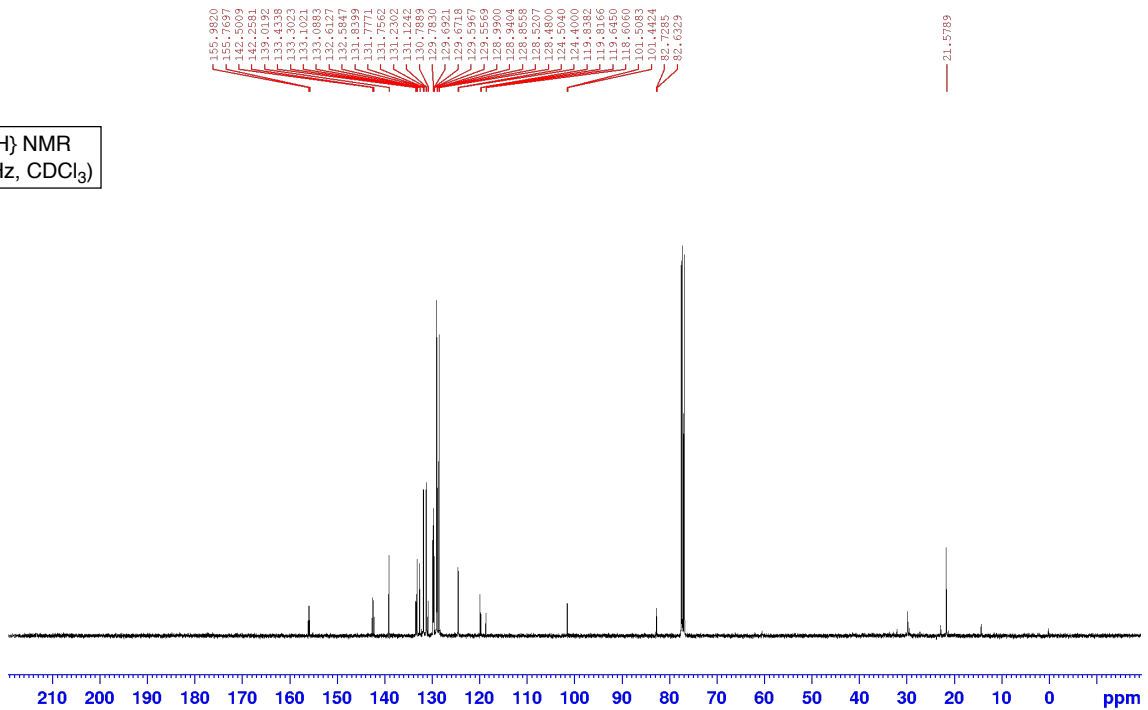

$^{31}\text{P}\{^1\text{H}\}$  NMR  
(162 MHz,  $\text{CDCl}_3$ )

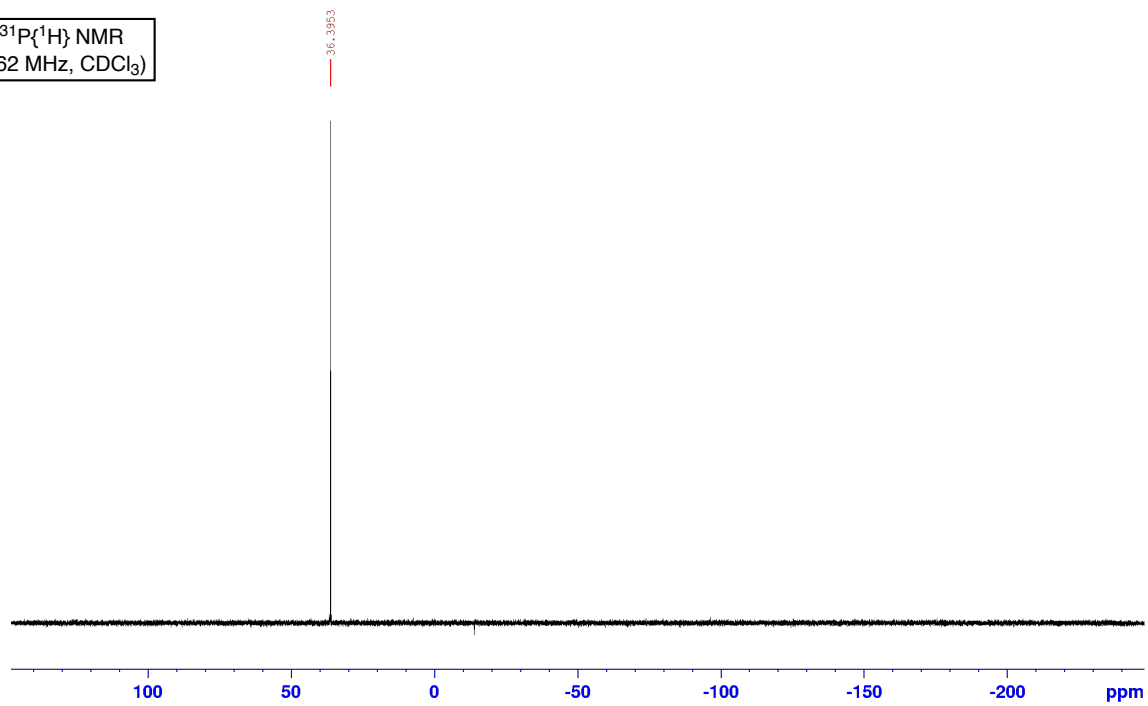

[<sup>1</sup>H, <sup>13</sup>C{<sup>1</sup>H}, and <sup>31</sup>P{<sup>1</sup>H} NMR Spectra of **3ah**]

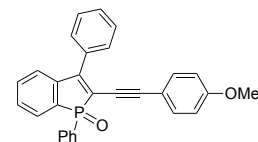

<sup>1</sup>H NMR  
(400 MHz, CDCl<sub>3</sub>)

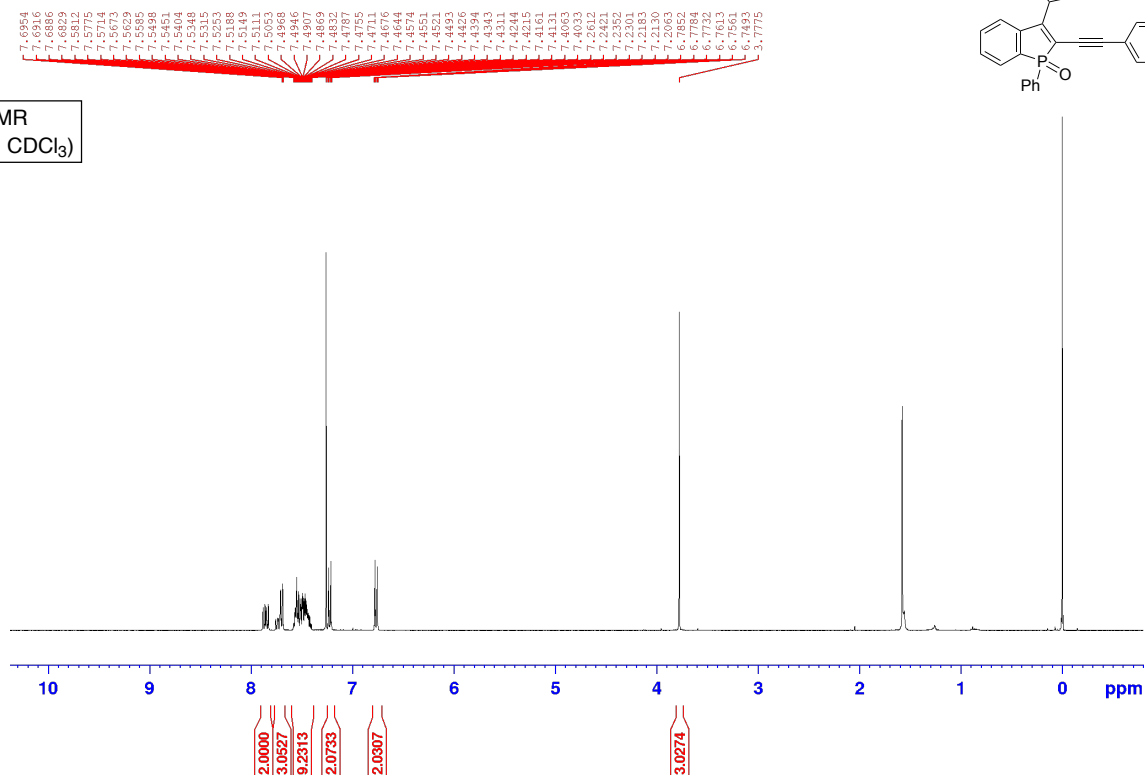

<sup>13</sup>C{<sup>1</sup>H} NMR  
(100 MHz, CDCl<sub>3</sub>)

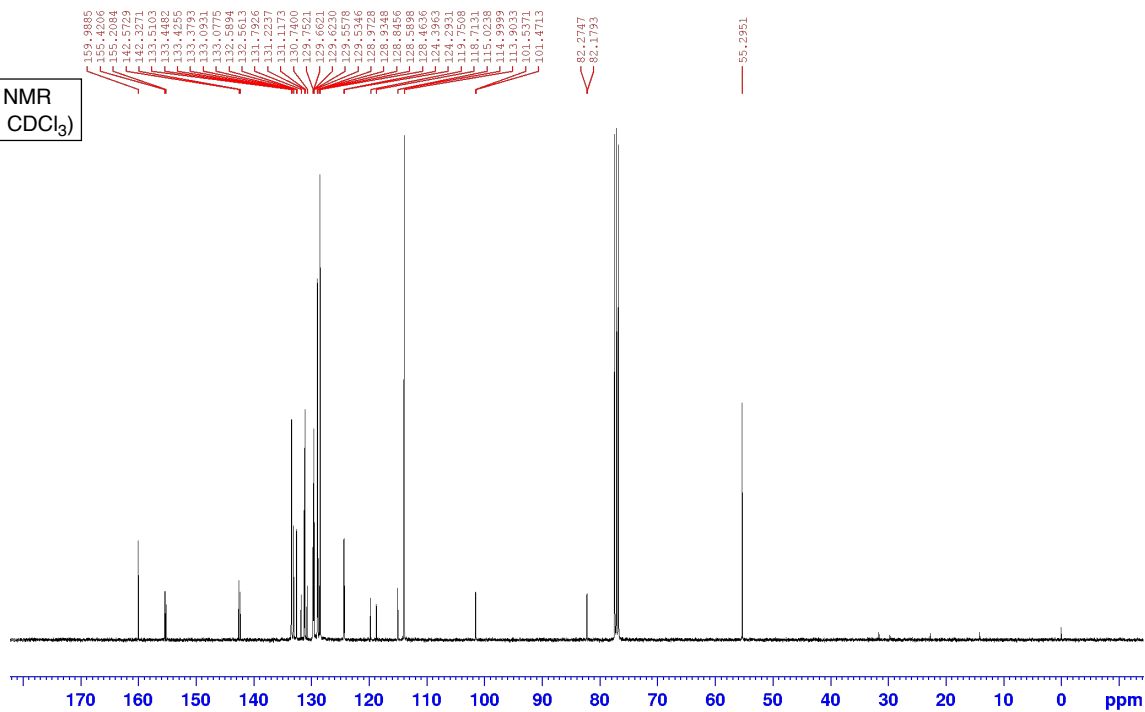

$^{31}\text{P}\{^1\text{H}\}$  NMR  
(162 MHz,  $\text{CDCl}_3$ )

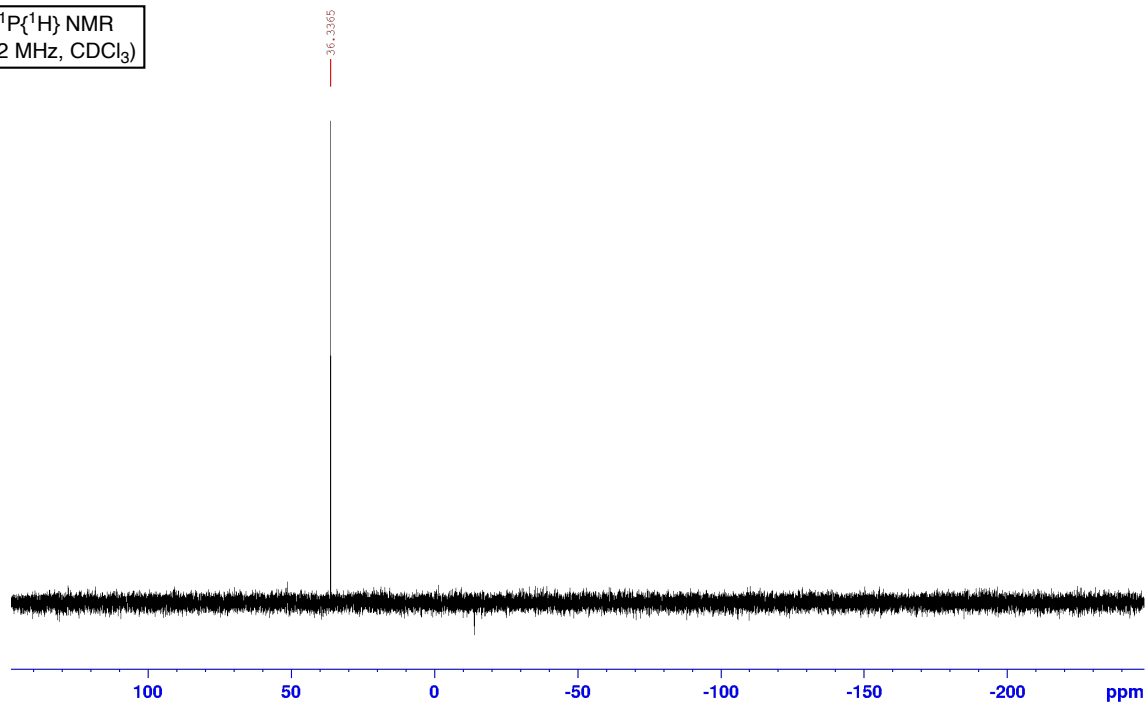

[<sup>1</sup>H, <sup>13</sup>C{<sup>1</sup>H}, and <sup>31</sup>P{<sup>1</sup>H} NMR Spectra of 4]

<sup>1</sup>H NMR  
(400 MHz, CDCl<sub>3</sub>)

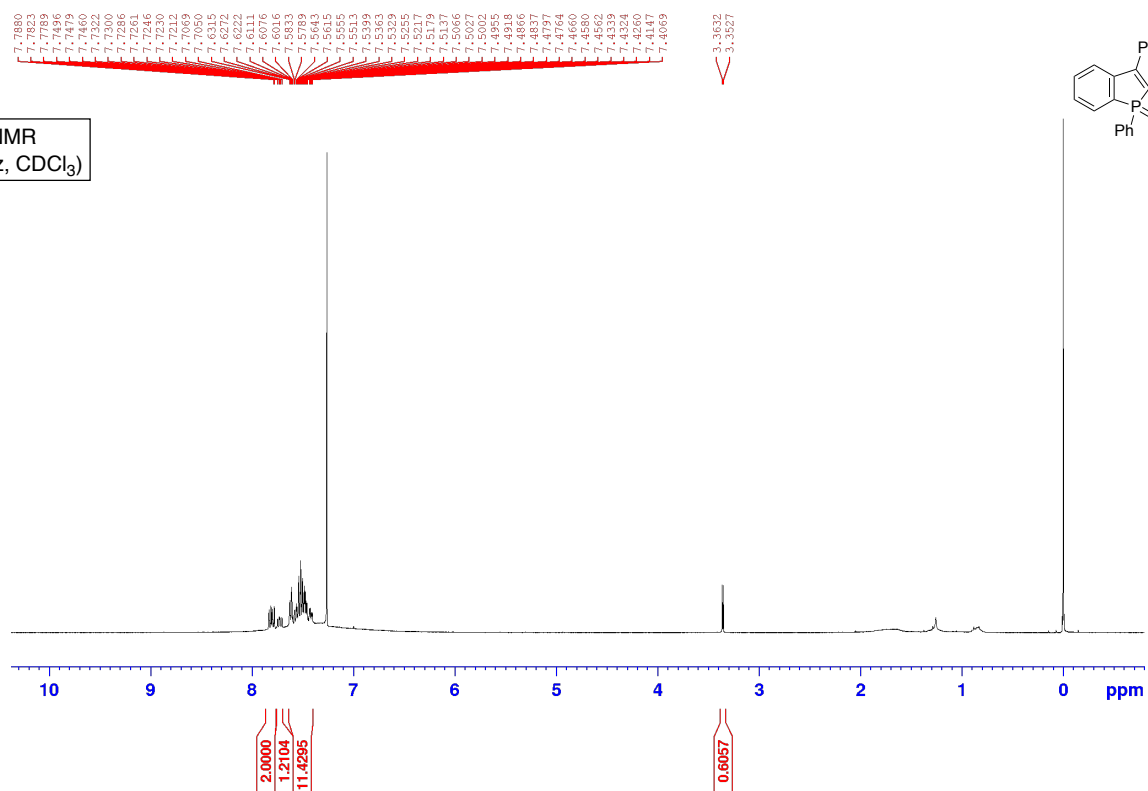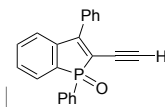

<sup>13</sup>C{<sup>1</sup>H} NMR  
(100 MHz, CDCl<sub>3</sub>)

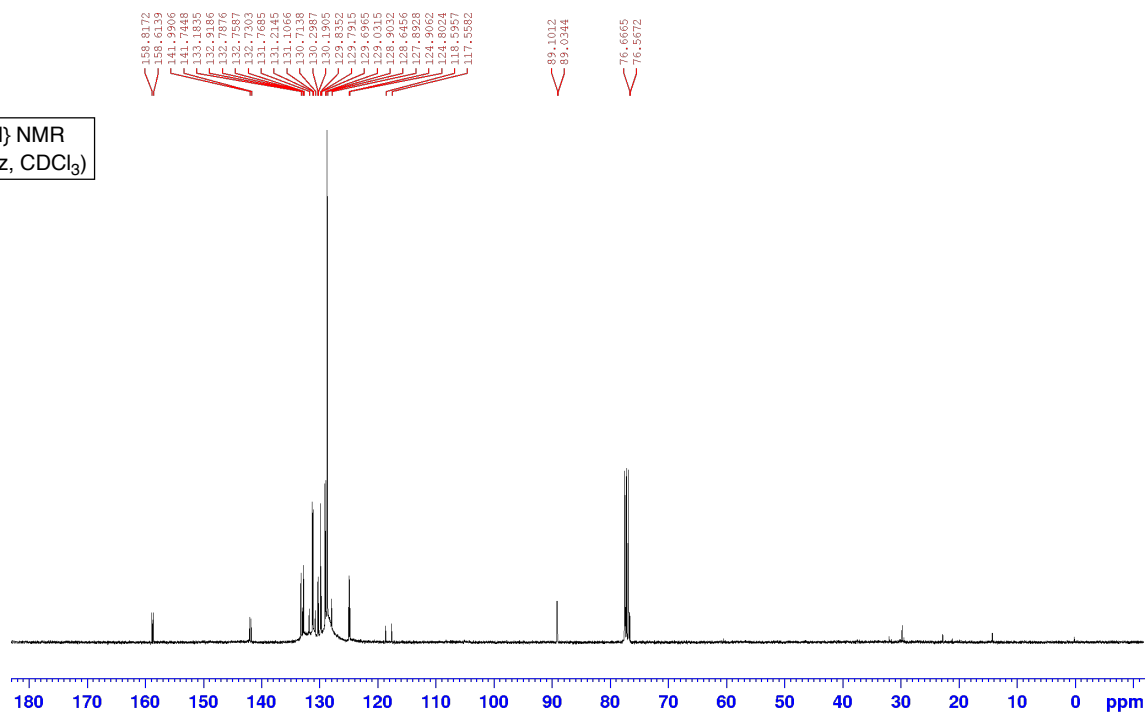

$^{31}\text{P}\{^1\text{H}\}$  NMR  
(162 MHz,  $\text{CDCl}_3$ )

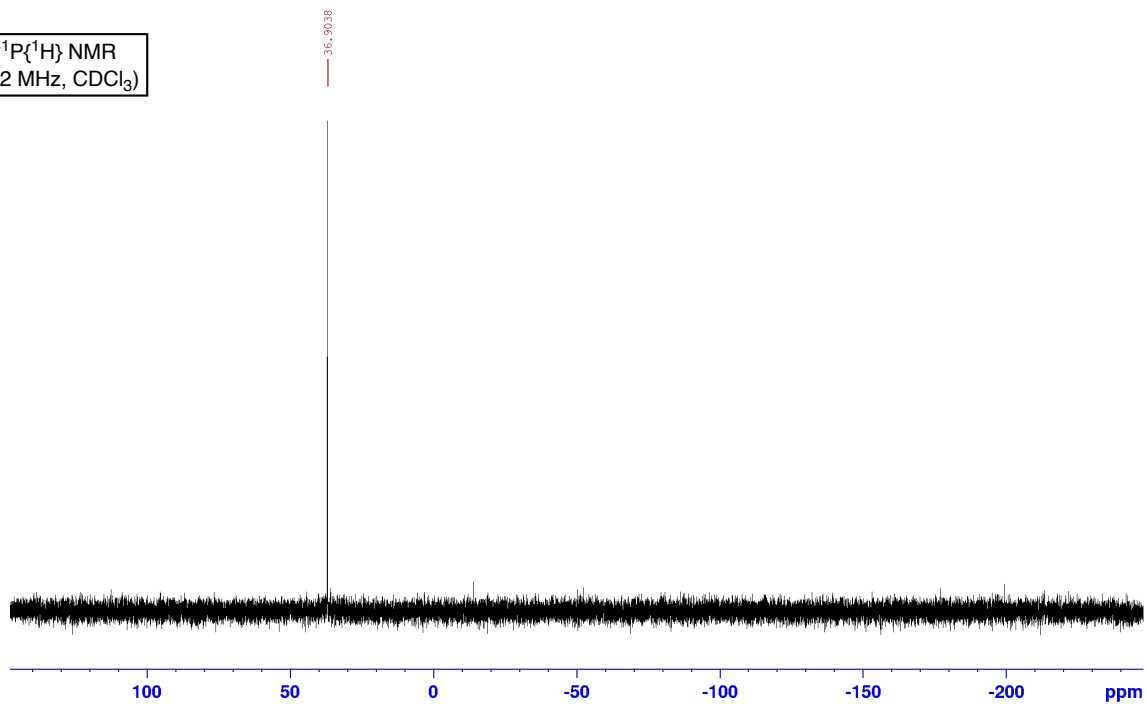

$[^1\text{H}, ^{13}\text{C}\{^1\text{H}\}, \text{ and } ^{31}\text{P}\{^1\text{H}\}] \text{ NMR Spectra of } \mathbf{5}$

7.7489  
7.7376  
7.7365  
7.7259  
7.7080  
7.65156  
7.5954  
7.5924  
7.4836  
7.4829  
7.4789  
7.4732  
7.4695  
7.4567  
7.4529  
7.4451  
7.4451  
7.4265  
7.4220  
7.4082  
7.4003  
7.3971  
7.3819  
7.3714  
7.3630  
7.3533  
7.3510  
7.3398  
7.3332  
7.3305  
7.3275  
7.3161  
7.3079  
7.3030  
7.2981  
7.2931  
7.2847  
7.2774  
7.2683  
7.2539  
7.2508  
7.2088  
7.0839  
7.0724  
7.0681  
7.0639  
7.0483  
7.0431  
6.7984  
5.3464  
5.2752  
5.2432

$^1\text{H NMR}$   
(400 MHz,  $\text{CDCl}_3$ )

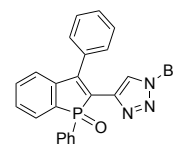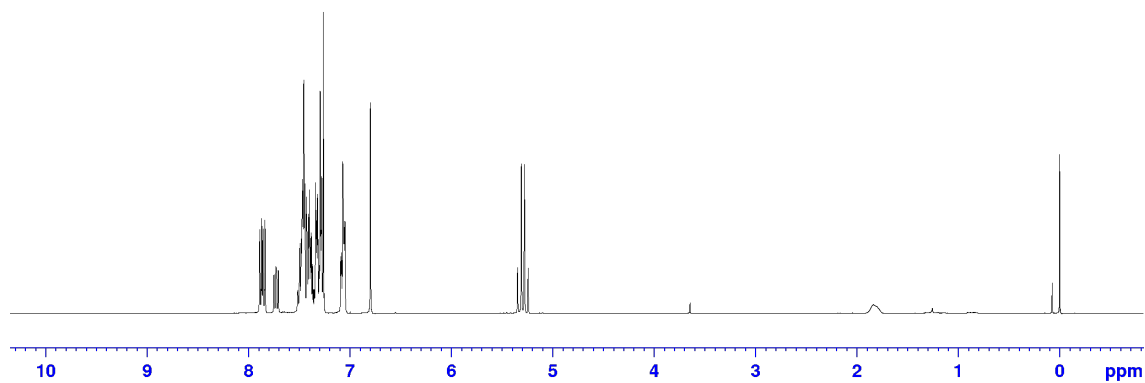

1.9587  
1.0000  
13.3184  
2.8923  
0.9502

149.5087  
149.3198  
144.027  
141.0209  
141.0209  
140.9102  
134.4720  
134.3289  
133.6666  
133.0183  
133.0004  
132.3400  
132.2229  
132.2229  
131.4247  
131.4247  
131.3152  
131.2761  
130.4338  
129.3157  
129.3157  
129.3078  
129.2428  
129.2011  
129.2011  
128.9379  
128.9379  
128.7536  
128.6384  
128.5961  
128.5961  
125.1778  
125.1778  
125.1244  
125.1244  
124.0188  
123.9131  
123.9131  
122.3225  
122.3225

77.4100  
77.2954  
76.7745  
53.8918

$^{13}\text{C}\{^1\text{H}\} \text{ NMR}$   
(100 MHz,  $\text{CDCl}_3$ )

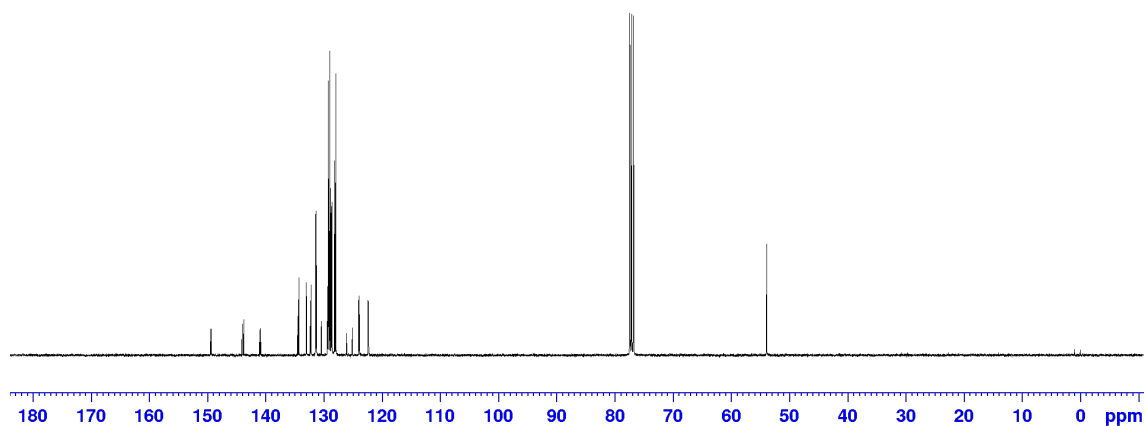

$^{31}\text{P}\{^1\text{H}\}$  NMR  
(162 MHz,  $\text{CDCl}_3$ )

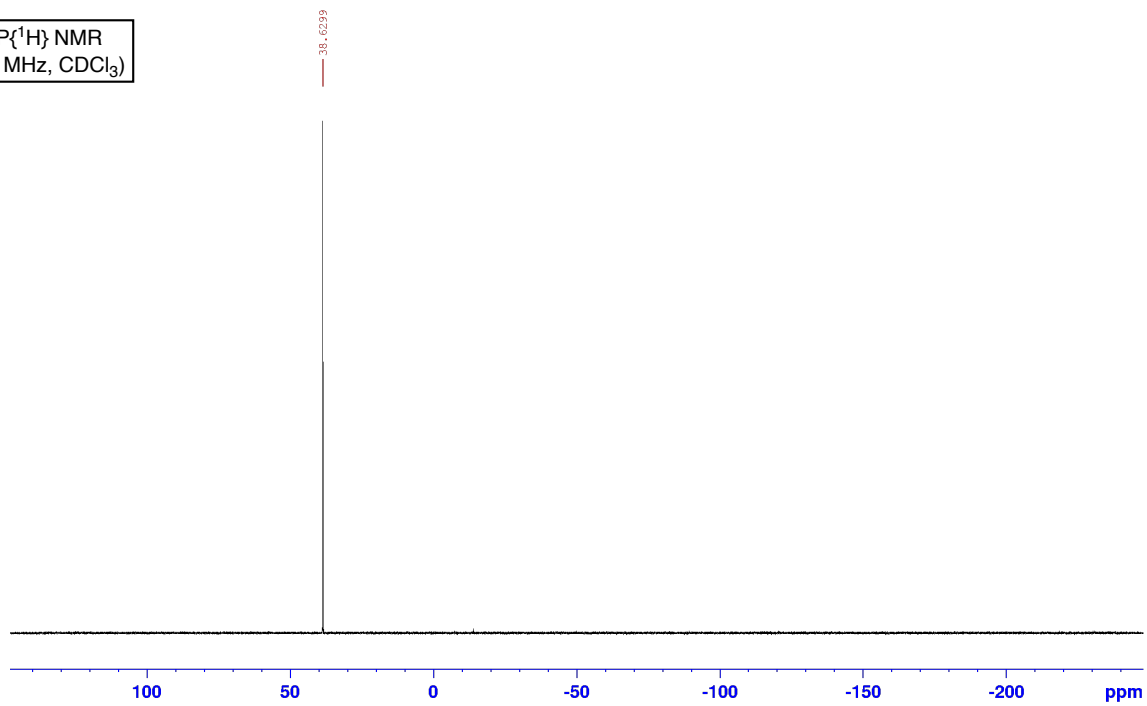



$^1\text{H}$ ,  $^{13}\text{C}\{^1\text{H}\}$ , and  $^3\text{P}\{^1\text{H}\}$  NMR Spectra of **6**

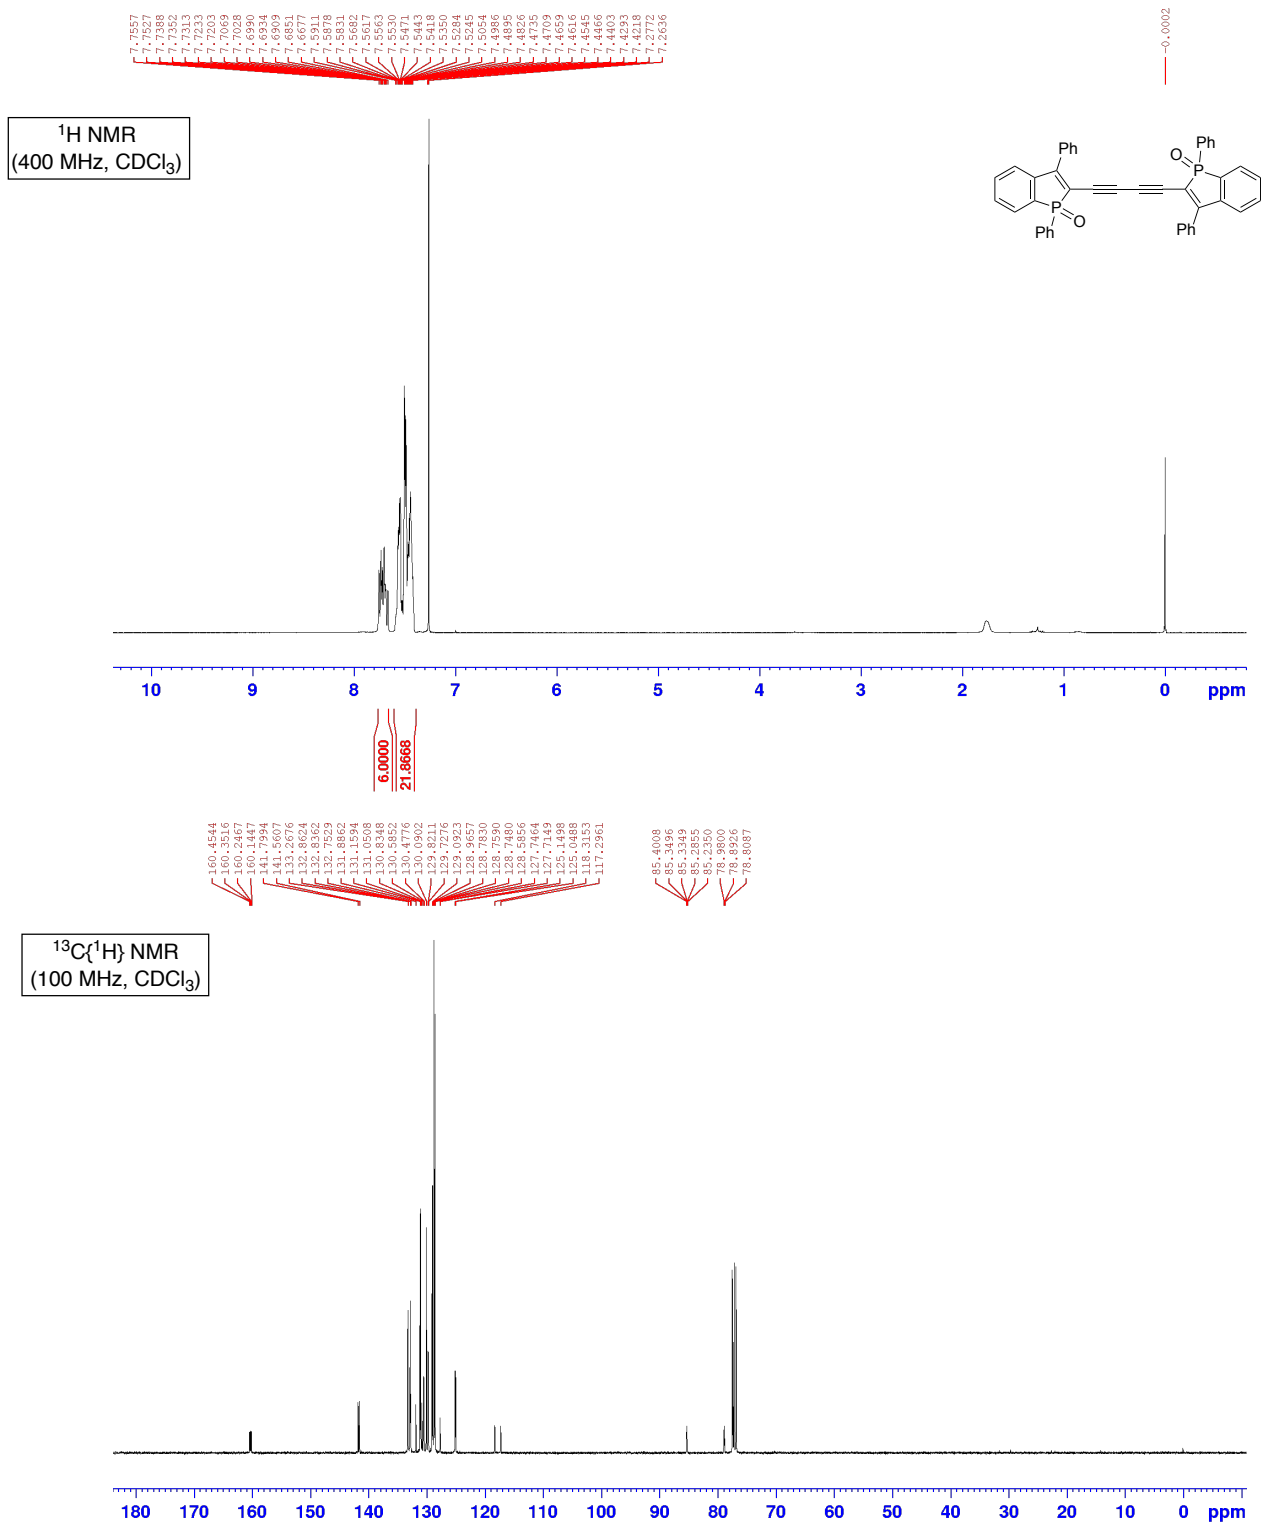

$^{31}\text{P}\{^1\text{H}\}$  NMR  
(162 MHz,  $\text{CDCl}_3$ )

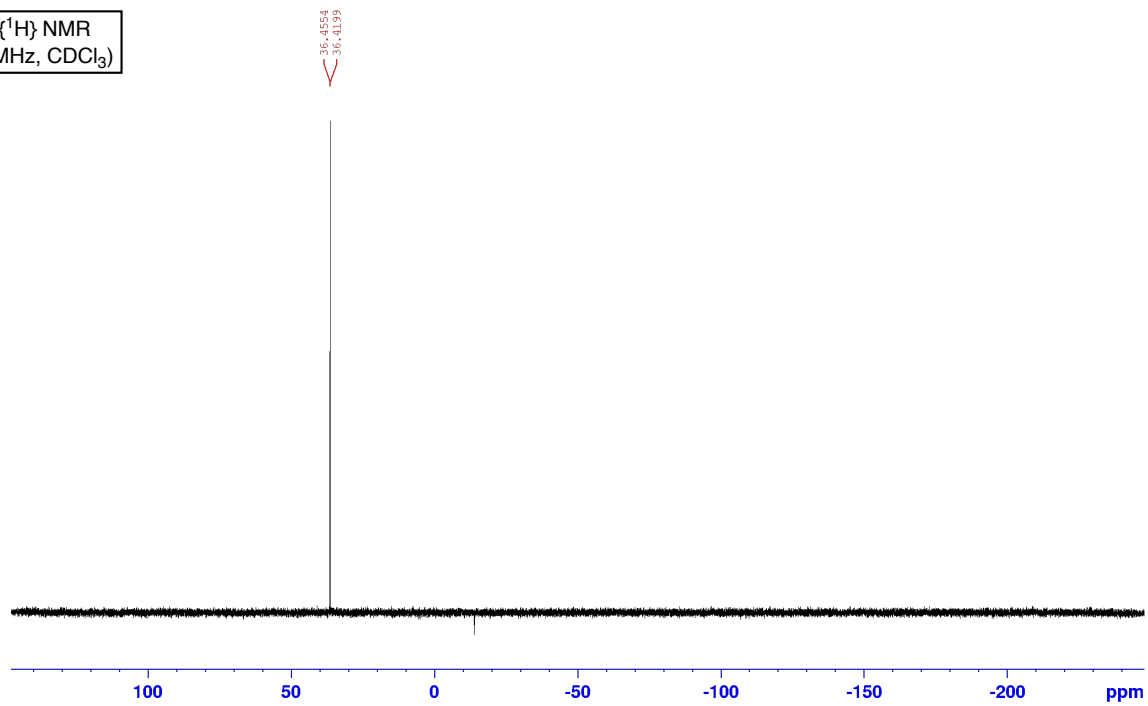

[<sup>1</sup>H, <sup>13</sup>C{<sup>1</sup>H}, and <sup>31</sup>P{<sup>1</sup>H} NMR Spectra of *syn-7*]

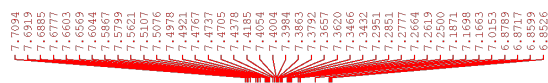

<sup>1</sup>H NMR  
(400 MHz, CDCl<sub>3</sub>)

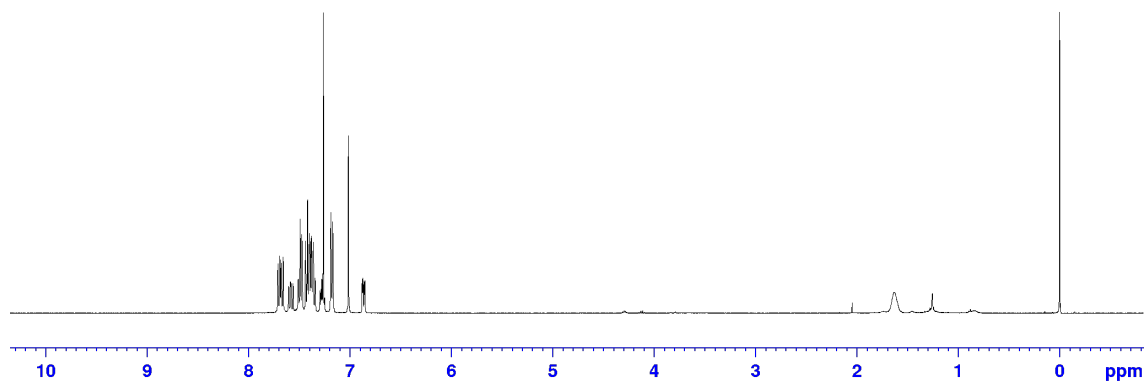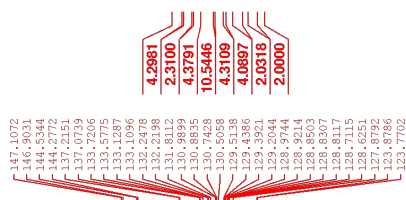

4.2961  
2.3100  
4.3791  
10.5446  
4.3109  
4.0897  
2.0318  
2.0000

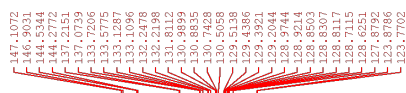

<sup>13</sup>C{<sup>1</sup>H} NMR  
(100 MHz, CDCl<sub>3</sub>)

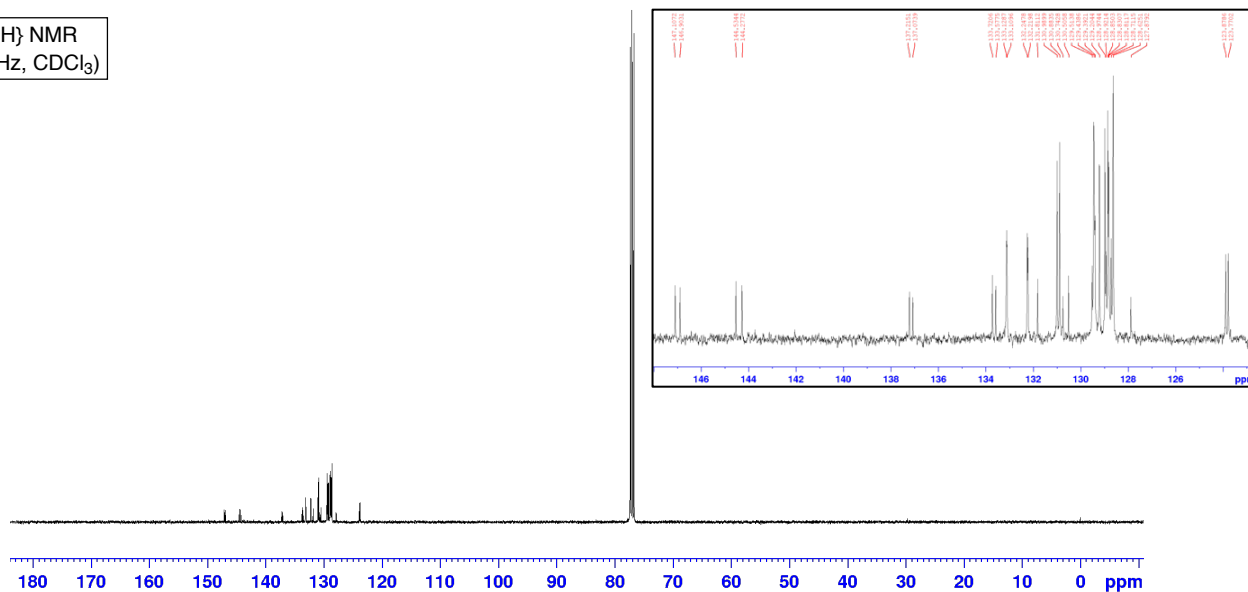

0.3901  
0.4877  
0.4663  
0.5079  
1.0734  
0.9864  
0.2597  
1.0280  
0.9746  
0.2466  
0.2402  
0.4143  
1.7590  
1.0245  
1.1554  
1.0098  
0.5278  
0.9615  
1.2736  
0.5664  
1.8763  
0.2138  
1.0000

$^{31}\text{P}\{^1\text{H}\}$  NMR  
(162 MHz,  $\text{CDCl}_3$ )

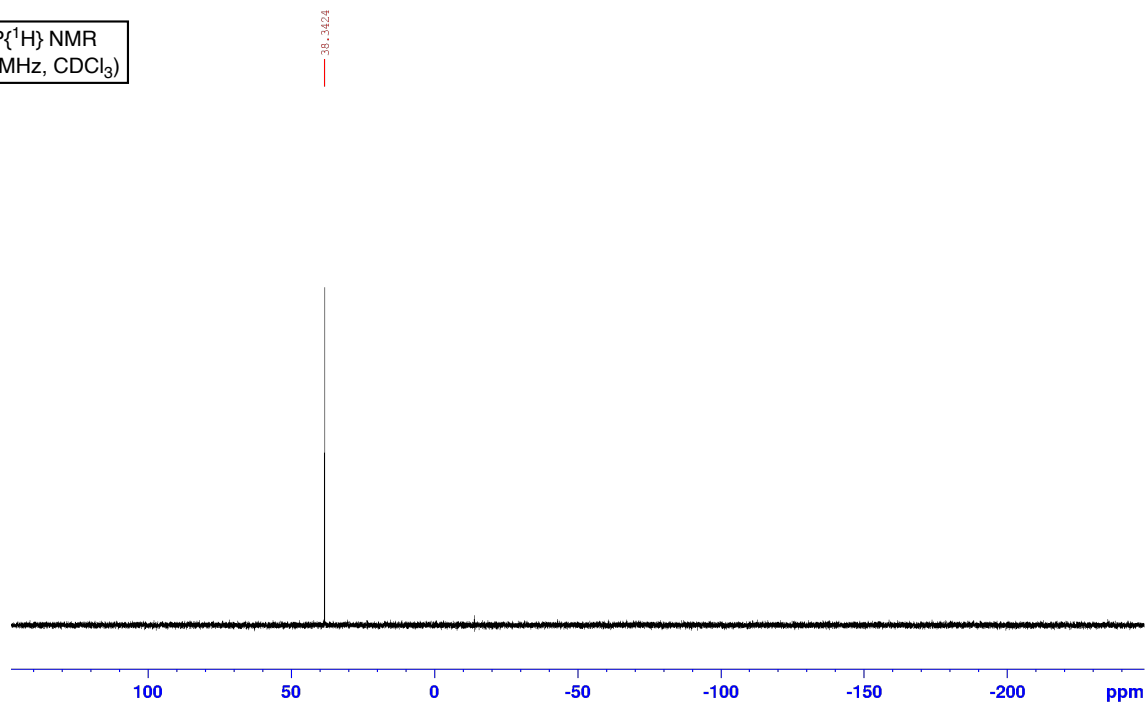

[<sup>1</sup>H, <sup>13</sup>C{<sup>1</sup>H}, and <sup>31</sup>P{<sup>1</sup>H} NMR Spectra of *anti*-7]

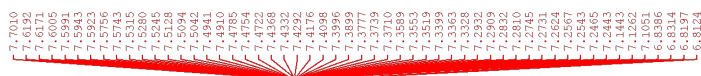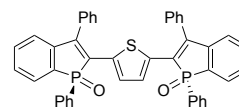

<sup>1</sup>H NMR  
(400 MHz, CDCl<sub>3</sub>)

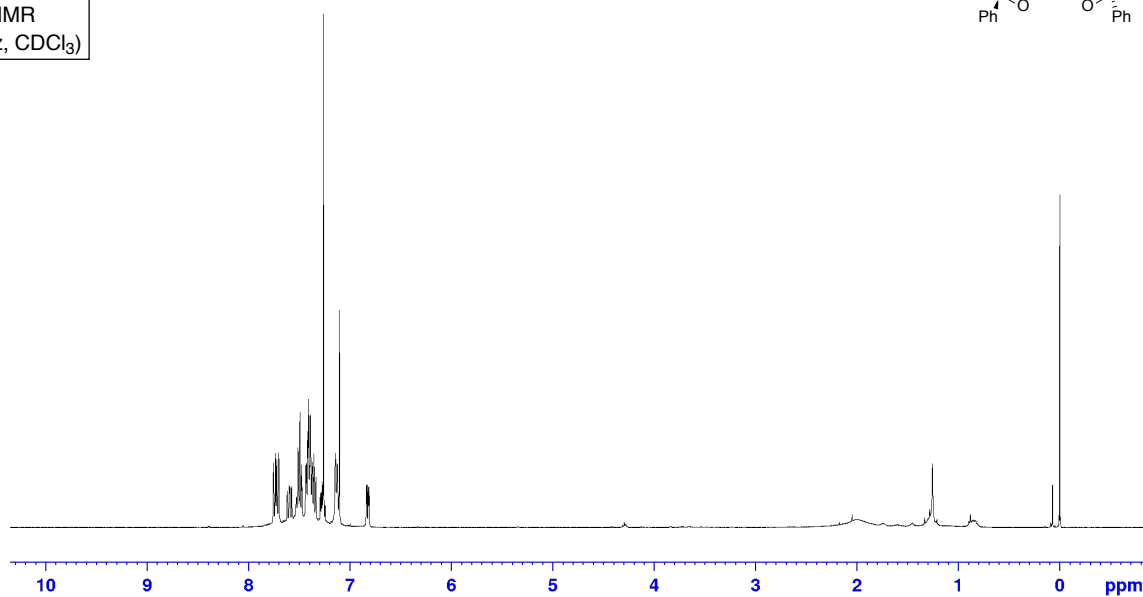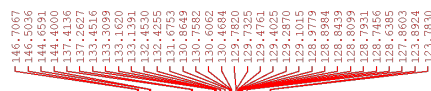

<sup>13</sup>C{<sup>1</sup>H} NMR  
(100 MHz, CDCl<sub>3</sub>)

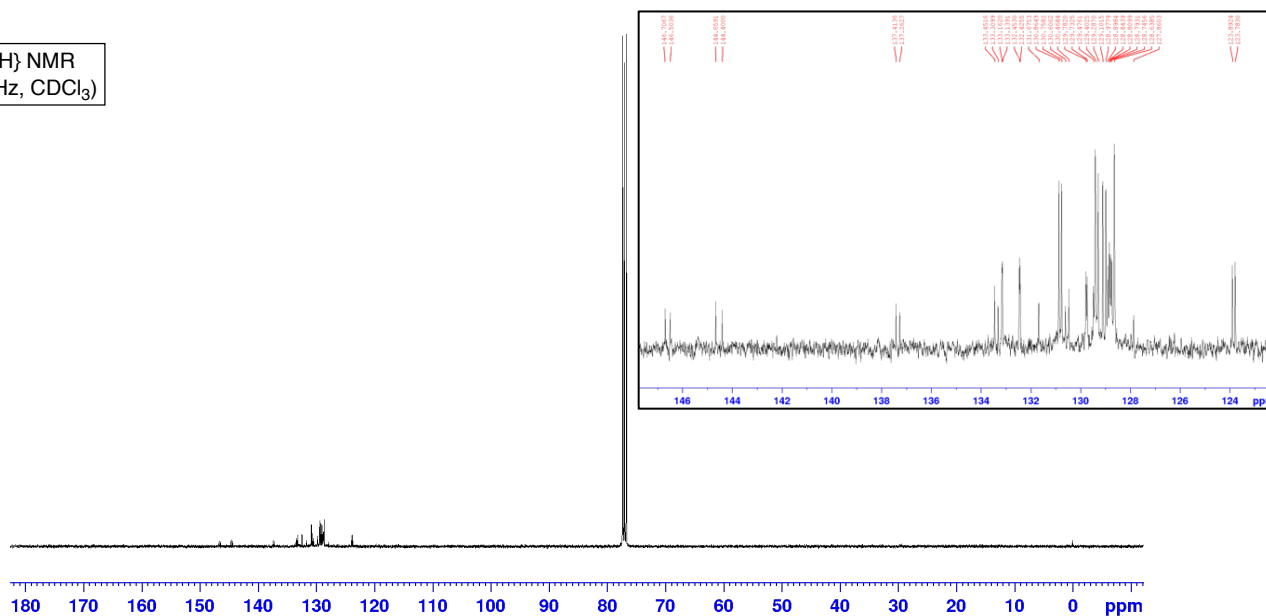

$^{31}\text{P}\{^1\text{H}\}$  NMR  
(162 MHz,  $\text{CDCl}_3$ )

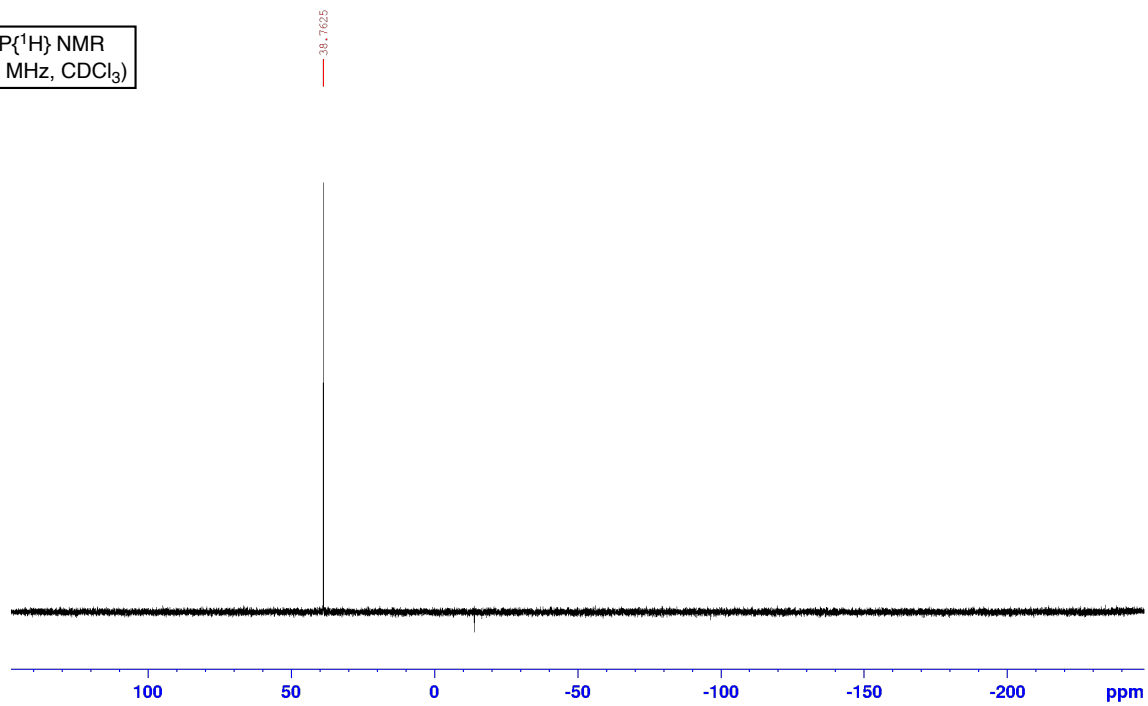

$^1\text{H}$ ,  $^{13}\text{C}\{^1\text{H}\}$ , and  $^{31}\text{P}\{^1\text{H}\}$  NMR Spectra of **8**

$^1\text{H}$  NMR  
(400 MHz,  $\text{CDCl}_3$ )

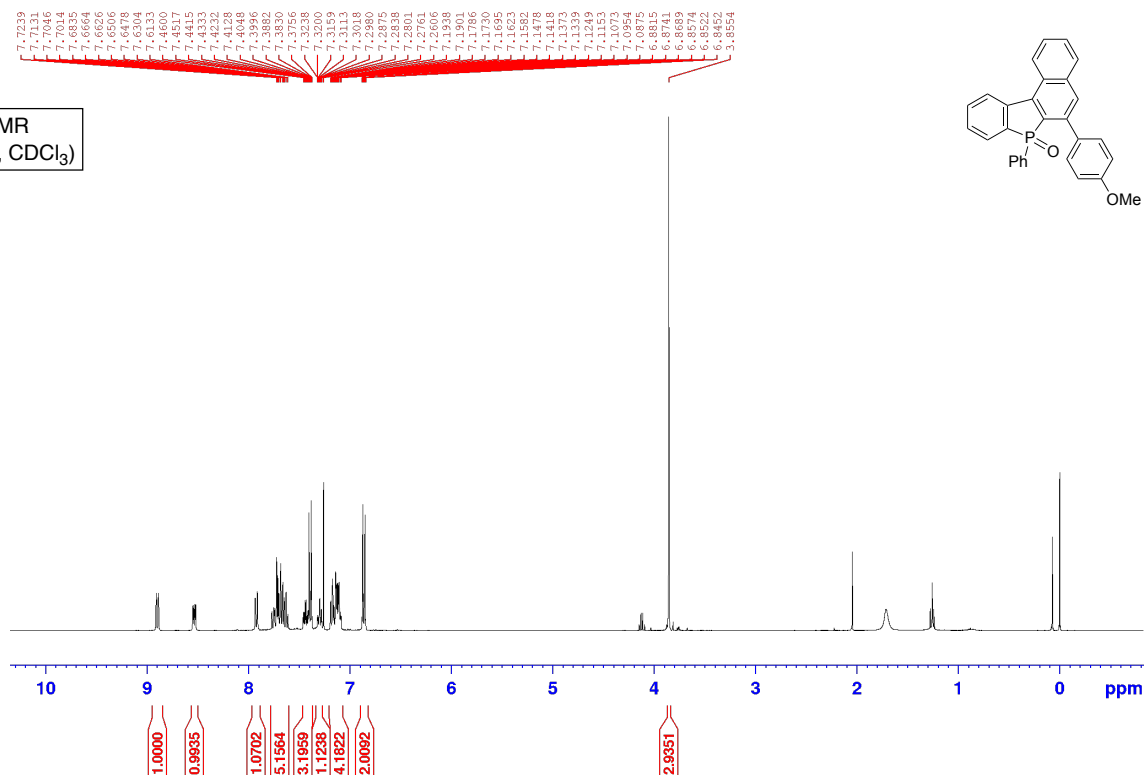

$^{13}\text{C}\{^1\text{H}\}$  NMR  
(100 MHz,  $\text{CDCl}_3$ )

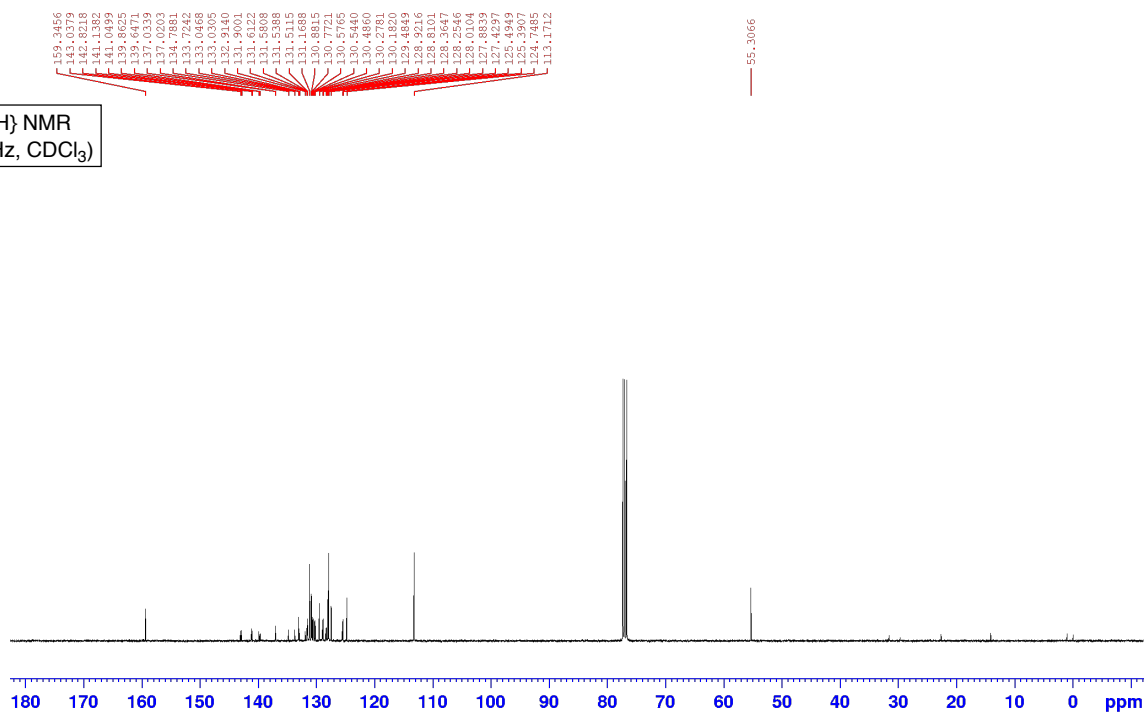

$^{31}\text{P}\{^1\text{H}\}$  NMR  
(162 MHz,  $\text{CDCl}_3$ )

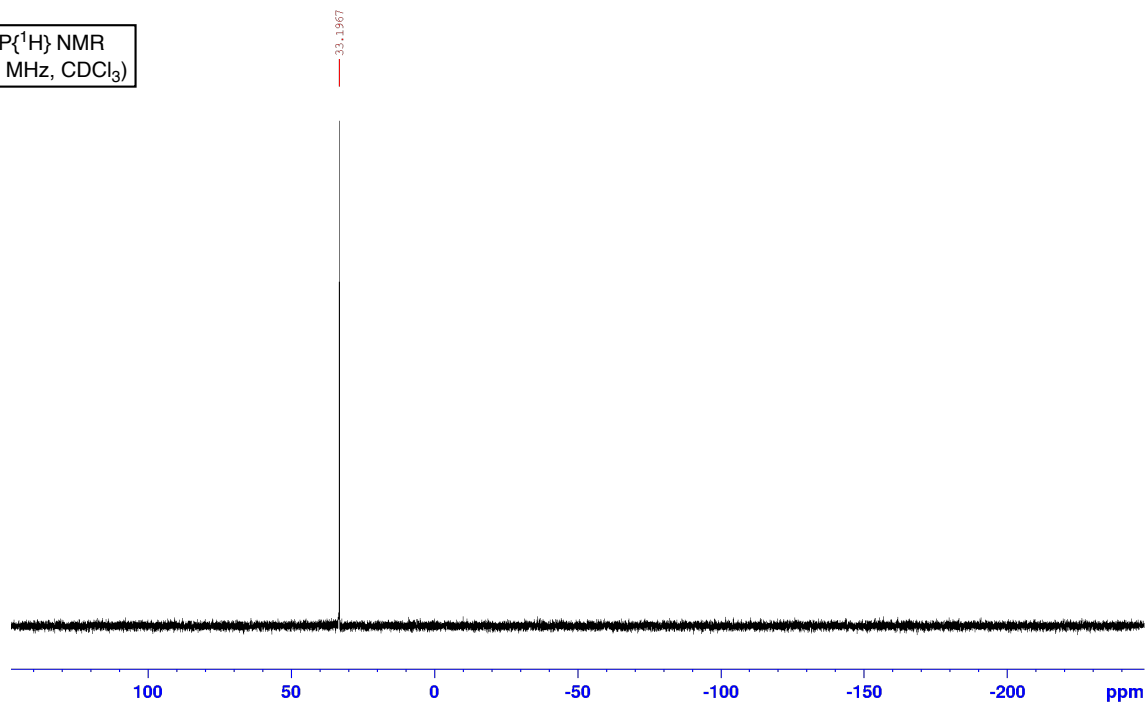



## References

- (S1) (a) K. Nishimura, K. Hirano and M. Miura, *Org. Lett.*, 2020, **22**, 3185; (b) S. Xu, K. Nishimura, K. Saito, K. Hirano and M. Miura, *Chem. Sci.*, 2022, **13**, 10950.
- (S2) (a) S. Ninolai, C. Piemontesi and J. Waser, *Angew. Chem., Int. Ed.*, 2011, **50**, 4680; (b) R. Plamont, L. V. Graux and H. Clavier, *Eur. J. Org. Chem.*, 2018, **2018**, 1372; (c) T. Liu, J. X. Qiao, M. A. Poss and J.-Q. Yu, *Angew. Chem., Int. Ed.*, 2017, **56**, 10924; (d) X. Xiao, T. Wang, F. Xu and T. R. Hoye, *Angew. Chem., Int. Ed.*, 2018, **57**, 16564.
- (S3) H. K. Klein, B. Zettel, U. Flöcker and H.-J. Haupt, *Chem. Ber.*, 1992, **125**, 9.
- (S4) U. Dutta, G. Prakash, K. Devi, K. Borah, X. Zhang and D. Maiti, *Chem. Sci.*, 2023, **14**, 11381.
